# Supplementary material for: Assessing the implications of a ‘Net Zero’ strategy for biodiversity
Source: Research Square preprint supplement (doi:10.21203/rs.3.rs-5393552/v1), 2025-01-30
Supplement: Supplementary file 1 [file ce2adbc9f4a87b2be362d199.xlsx]

## Sheet: 1. Net Zero Strategy
	Table 1: The college's Net Zero strategy
	Phase of strategy	Timeline	Activities
	Phase 1: Energy Monitoring	2022-2023	- Installing meters to measure Heat and Electric at point of use
			- Occupancy sensors and automatic controls for electricity and heating
	Phase 2: Surveying	2023-2025	- Electric metering survey
			- Loft survey
			- Window survey
			- Building fabric survey
			- Pipes and pumps survey
	Phase 3: Upgrading building fabric	2025-2027	- Double or triple glazing of windows
			- Fitting heritage shutters
			- Loft insulation
			- Sealing air gaps
			- Insulating cold bridges
			- Adding internal insulation to cold external walls
			- Cavity wall insulation
			- Installing External doors
	Phase 4: Energy reduction	2027-2030	- Lagging of hot water pipes
			- Lagging of heating pipes
			- Replacing circulation pumps
			- Installing electric boilers
			- Upgrading white goods to be more energy efficient: fridges, ovens, hobs, washer-dryers
			- Upgrading HVAC units
			- LED bulb and fitting replacement
			- Lighting Bluetooth sensors
			- TREND BMS upgrade
			- All day storage heaters
			- Preparations for Phase 5: underfloor heating, replacement of larger radiators, replacement of carpets and tiles.
	Phase 5: Sustainable energy generation solutions	2030-2032 (with extension until 2035 if necessary)	- Thermal energy storage batteries
			- Ground source heat pumps and associated landscaping
			- Solar panel arrays
			- Air source heat pumps
			- Upgrading transformer
			- Upgrading of services pipework

## Sheet: 2. Baseline 
Table 1a): ReCiPe baseline impacts [1]
Acivity details				RECIPE MID POINT IMPACT								END POINT IMPACT (BIODIVERSITY)		END POINT IMPACT (CLIMATE CHANGE)
Activity name	Activity Value 2022-2023	Activity Unit	Impact driver	RECIPE mid-to-end-point pathway (environmental pressure)	mid point characterisation source	mid point characterisation factor	mid point characterisation unit	mid point impact value	mid point impact unit	RECIPE end point characterisation factor	Units	End point impact value	End point characterisation unit	End point impact value	End point characterisation unit
Direct land use	32474.5	m^2 annual crop eq	Land use	Land use- occupation	NA	1	/	32474.5	m^2 annual crop eq	8.88e-09	species.yr/m^2 annual crop eq	0.000288373	species.yr		kg CO2e
Direct water footprint	17674	m^3	GHG	Global Warming-Freshwater ecosystems	[41]	0.149	kg CO2e/m3	2633.43	kg CO2e	7.65e-14	species.yr/kg CO2e	2.01457e-10	species.yr	2633.43	kg CO2e
Direct water footprint	7334.71	m^3	Water use	Water consumption- aquatic ecosystems	NA	1	/	7334.71	m^3	0	species.year/m^3	0	species.yr		kg CO2e
Direct water footprint	17674	m^3	GHG	Global Warming-Terrestrial ecosystems	[41]	0.149	kg CO2e/m3	2633.43	kg CO2e	2.8e-09	species.yr/kg CO2e	7.37359e-06	species.yr	/	kg CO2e
Direct water footprint	7334.71	m^3	Water use	water consumption- terrestrial ecosystems	NA	1	/	7334.71	m^3	1.74e-09	species.year/m^3	1.27624e-05	species.yr		kg CO2e
Grid electricity	1845897	KwH	Water use	Water consumption- aquatic ecosystems	[4]	0.00892083	m3/kWh	16466.9	m^3	6.04e-13	species.year/m^3	9.94603e-09	species.yr		kg CO2e
Grid electricity	1845897	KwH	GHG	Global Warming-Freshwater ecosystems	[41]	0.24386	CO2e/kwh	450140	kg CO2e	7.65e-14	species.yr/kg CO2e	3.44357e-08	species.yr	450140	kg CO2e
Grid electricity	1845897	KwH	Water pollution	Toxicity- Freshwater ecosystems	[4]	9.27406e-05	CTU/kWh	171.19	kg 1,4-DCB eq	6.95e-10	species.yr/kg 1,4-DCBeq	1.18977e-07	species.yr		kg CO2e
Grid electricity	1845897	KwH	Water use	water consumption- terrestrial ecosystems	[5]	0.00892083	m3/kWh	16466.9	m^3	1.35e-08	species.year/m^3	0.000222304	species.yr		kg CO2e
Grid electricity	1845897	KwH	Water pollution	Eutrophication-Freshwater Ecosytems	[4]	2.05173e-05	kg P eq/kWh	37.8729	kg P to fresh water	6.71073e-07	species.yr/kg P eq	2.54155e-05	species.yr		kg CO2e
Grid electricity	1845897	KwH	Land use	Land use- occupation	[5]	0.0288746	m^2/kWh	38908.7	m^2 annual crop eq	8.88e-09	species.yr/m^2 annual crop eq	0.000345509	species.yr		kg CO2e
Grid electricity	1845897	KwH	Air pollution	Acidification- terrestrial ecosystems	[4]	0.000311639	kg SO2/kWh	575.254	kg SO2 to air	2.12e-07	species.yr/kg SO2 eq	0.000121954	species.yr		kg CO2e
Grid electricity	1845897	KwH	Air pollution	Photochemical ozone formation- terrestrial ecosystems	[4]	0.000149822	kg NMVOC/kWh	276.556	kg NOx to air	3.741e-08	species.yr/kg NOx eq	1.0346e-05	species.yr		kg CO2e
Grid electricity	1845897	KwH	GHG	Global Warming-Terrestrial ecosystems	[41]	0.24386	kg CO2e/kWh	450140	kg CO2e	2.8e-09	species.yr/kg CO2e	0.00126039	species.yr	/	kg CO2e
Renewable electricity	1845897	KwH	Water use	Water consumption- aquatic ecosystems	[5]	0.0139482	m3/kWh	25746.9	m^3	6.04e-13	species.year/m^3	1.55511e-08	species.yr		kg CO2e
Renewable electricity	1845897	KwH	GHG	Global Warming-Freshwater ecosystems	[4]	0.0362123	kg CO2e/kWh	66844.2	kg CO2e	7.65e-14	species.yr/kg CO2e	5.11358e-09	species.yr	66844.2	kg CO2e
Renewable electricity	1845897	KwH	Water pollution	Toxicity- Freshwater ecosystems	[4]	6.38331e-05	CTU/kWh	117.829	kg 1,4-DCB eq	6.95e-10	species.yr/kg 1,4-DCBeq	8.18914e-08	species.yr		kg CO2e
Renewable electricity	1845897	KwH	Water use	water consumption- terrestrial ecosystems	[5]	0.0139482	m3/kWh	25746.9	m^3	1.35e-08	species.year/m^3	0.000347583	species.yr		kg CO2e
Renewable electricity	1845897	KwH	Water pollution	Eutrophication-Freshwater Ecosytems	[4]	8.90562e-05	kg P eq/kWh	164.389	kg P to fresh water	6.71073e-07	species.yr/kg P eq	0.000110317	species.yr		kg CO2e
Renewable electricity	1845897	KwH	Air pollution	Photochemical ozone formation- terrestrial ecosystems	[4]	6.51924e-05	kg NMVOC/kWh	120.338	kg NOx to air	3.741e-08	species.yr/kg NOx eq	4.50186e-06	species.yr		kg CO2e
Renewable electricity	1845897	KwH	Air pollution	Acidification- terrestrial ecosystems	[4]	0.000122007	kg SO2/kWh	225.212	kg SO2 to air	2.12e-07	species.yr/kg SO2 eq	4.7745e-05	species.yr		kg CO2e
Renewable electricity	1845897	KwH	GHG	Global Warming-Terrestrial ecosystems	[5]	0.0362123	kg CO2e/kWh	66844.2	kg CO2e	2.8e-09	species.yr/kg CO2e	0.000187164	species.yr	/	kg CO2e
Renewable electricity	1845897	KwH	Land use	Land use- occupation	[5]	0.0139482	m^2/kWh	67509.5	m^2 annual crop eq	8.88e-09	species.yr/m^2 annual crop eq	0.000599484	species.yr		kg CO2e
Fuel from sites	3.96441e+06	KwH	GHG	Global Warming-Freshwater ecosystems	[41]	0.21364	kg CO2e/kWh	846957	kg CO2e	7.65e-14	species.yr/kg CO2e	6.47922e-08	species.yr	846957	kg CO2e
Fuel from sites	3.96441e+06	KwH	Water pollution	Toxicity- Freshwater ecosystems	[4]	3.68154e-07	kg 1,4-DCB-eq/kWh	1.45951	kg 1,4-DCB eq	6.95e-10	species.yr/kg 1,4-DCBeq	1.01436e-09	species.yr		kg CO2e
Fuel from sites	3.96441e+06	KwH	Land use	Land use- occupation	[5]	0.0020952	m^2/kWh	578.804	m^2 annual crop eq	8.88e-09	species.yr/m^2 annual crop eq	5.13978e-06	species.yr		kg CO2e
Fuel from sites	3.96441e+06	KwH	Water pollution	Eutrophication-Freshwater Ecosytems	[4]	0.0002	kg P eq/kWh	792.882	kg P to fresh water	6.71073e-07	species.yr/kg P eq	0.000532082	species.yr		kg CO2e
Fuel from sites	3.96441e+06	KwH	Air pollution	Acidification- terrestrial ecosystems	[5]	0.00049594	kg SO2/kWh	1966.11	kg SO2 to air	2.12e-07	species.yr/kg SO2 eq	0.000416815	species.yr		kg CO2e
Fuel from sites	3.96441e+06	KwH	Air pollution	Photochemical ozone formation- terrestrial ecosystems	[4]	0.000225	kg NMVOC/kWh	891.992	kg NOx to air	3.741e-08	species.yr/kg NOx eq	3.33694e-05	species.yr		kg CO2e
Fuel from sites	3.96441e+06	KwH	Water use	Water consumption- aquatic ecosystems	[5]	0.0020952	m3/kWh	8306.23	m^3	6.04e-13	species.year/m^3	5.01696e-09	species.yr		kg CO2e
Fuel from sites	3.96441e+06	KwH	GHG	Global Warming-Terrestrial ecosystems	[41]	0.21364	kg CO2e/kWh	846957	kg CO2e	2.8e-09	species.yr/kg CO2e	0.00237148	species.yr	/	kg CO2e
Fuel from sites	3.96441e+06	KwH	Water use	water consumption- terrestrial ecosystems	[5]	0.0020952	m3/kWh	8306.23	m^3	1.35e-08	species.year/m^3	0.000112134	species.yr		kg CO2e
Land holdings	7.81186e+06	m^2 annual crop eq	Land use	Land use- occupation	NA	1	/	7.81186e+06	m^2 annual crop eq	8.88e-09	species.yr/m^2 annual crop eq	0.0693693	species.yr		kg CO2e
Water waste	16874.4	m^3	GHG	Global Warming-Freshwater ecosystems	[41]	0.272	kg CO2e/m3	4589.82	kg CO2e	7.65e-14	species.yr/kg CO2e	3.51122e-10	species.yr	4589.82	kg CO2e
Water waste	16874.4	m^3	GHG	Global Warming-Terrestrial ecosystems	[41]	0.272	kg CO2e/m3	4589.82	kg CO2e	2.8e-09	species.yr/kg CO2e	1.28515e-05	species.yr	/	kg CO2e
General waste	64.548	tonnes	GHG	Global Warming-Freshwater ecosystems	[41]	446.204	kg CO2e/tonne	28801.6	kg CO2e	7.65e-14	pdf*yr/kg CO2e	2.20332e-09	species.yr	28801.6	kg CO2e
General waste	64.548	tonnes	GHG	Global Warming-Terrestrial ecosystems	[41]	446.204	kg CO2e/tonne	28801.6	kg CO2e	2.8e-09	pdf*yr/kg CO2e	8.06444e-05	species.yr	/	kg CO2e
Within-scope footprint (grid electricity, onsite land use)												0.00585918	species.yr	1.33312e+06	kg CO2e
Within-scope footprint (renewable electricity, onsite land use)												0.00517	species.yr	949826	kg CO2e
Grid Electricity impacts												0.00198608	species.yr	450140	kg CO2e
Renewable electricity impacts												0.0012969	species.yr	66844.2	kg CO2e
Fuel impacts												0.00347109	species.yr	846957	kg CO2e
Table 2: LC-IMPACT baseline impacts [2]
Acivity details				LC-IMPACT MID POINT IMPACT								END POINT IMPACT (BIODIVERSITY)
Activity name	Activity Value 2022-2023	Activity Unit	Impact driver	LCIMPACT mid-to-end-point pathway (environmental pressure)	mid point characterisation source	mid point characterisation factor	mid point characterisation factor unit	mid point impact value	LC IMPACT mid point impact unit	LCIMPACT end point characterisation factor	LCIMPACT end point characterisation factor unit	minimum end point impact value	End point unit
Direct land use	46153	m^2 annual crop equivalent	Land use	Land use- occupation	NA	1	/	1	m^2 annual crop eq	2.88908e-16	pdf-eq/m^2	2.88908e-16	pdf-eq
Direct water footprint	17674	m^3	GHG	Global Warming-Aquatic ecosystems	[41]	0.149	kg CO2e/m^3	2633.43	kg CO2	0	pdf*yr/kg CO2e	0	PDF*y
Direct water footprint	7334.71	m^3	Water use	Water consumption	NA	1	/	7334.71	m^3	6.31516e-16	pdf*yr/m^3	4.63199e-12	PDF*y
Direct water footprint	17674	m^3	GHG	Global Warming-Terrestrial ecosystems	[41]	0.149	kg CO2e/m^3	2633.43	kg CO2	1.75983e-15	pdf*yr/kg CO2e	4.63438e-12	PDF*y
Grid electricity	1845897	KwH	Water use	Water consumption	[5]	0.00892083	m3/kWh	16466.9	m^3	6.31516e-16	pdf*yr/m^3	1.03991e-11	PDF*y
Grid electricity	1845897	KwH	GHG	Global Warming-Aquatic ecosystems	[41]	0.24386	kgCO2e/kWh	450140	kg CO2	0	pdf*yr/kg CO2e	0	PDF*y
Grid electricity	1845897	KwH	Land use	Land use- occupation	[5]	98400	m2/kWh	56700	m^2 annual crop eq	2.88908e-16	pdf-eq/m^2	1.63811e-11	pdf-eq
Grid electricity	1845897	KwH	Air pollution	Acidification- terrestrial ecosystems	[4]	0.000311639	kg SO2 eq/kWh	575.254		7.53526e-18	PDF*yr/kg SO2	4.33469e-15	PDF*y
Grid electricity	1845897	KwH	GHG	Global Warming-Terrestrial ecosystems	[41]	0.24386	kgCO2e/kWh	450140	kg CO2	1.75983e-15	pdf*yr/kg CO2e	7.92171e-10	PDF*y
Renewable electricity	1845897	KwH	Water use	Water consumption	[5]	0.0139482	m3/kWh	25746.9	m^3	6.31516e-16	pdf*yr/m^3	1.62596e-11	PDF*y
Renewable electricity	1845897	KwH	GHG	Global Warming-Aquatic ecosystems	[5]	0.0362123	kgCO2e/kWh	66844.2	kg CO2	0	pdf*yr/kg CO2e	0	PDF*y
Renewable electricity	1845897	KwH	Air pollution	Acidification- terrestrial ecosystems	[4]	0.000122007	kg SO2 eq/kWh	225.212		7.53526e-18	PDF*yr/kg SO2	1.69703e-15	PDF*y
Renewable electricity	1845897	KwH	GHG	Global Warming-Terrestrial ecosystems	[5]	0.0362123	kgCO2e/kWh	66844.2	kg CO2	1.75983e-15	pdf*yr/kg CO2e	1.17634e-10	PDF*y
Renewable electricity	1845897	KwH	Land use	Land use- occupation	[5]	0.0500996	m2/kWh	98400	m^2 annual crop eq	2.88908e-16	pdf-eq/m^2	2.84286e-11	pdf-eq
Fuel from sites	3.96441e+06	KwH	GHG	Global Warming-Aquatic ecosystems	[41]	0.21364	kgCO2e/kWh	846957	kg CO2	0	pdf*yr/kg CO2e	0	PDF*y
Fuel from sites	3.96441e+06	KwH	Land use	Land use- occupation	[5]	0.0002	m2/kWh	844	m^2 annual crop eq	2.88908e-16	pdf-eq/m^2	2.43839e-13	pdf-eq
Fuel from sites	3.96441e+06	KwH	Air pollution	Acidification- terrestrial ecosystems	[4]	0.00049594	kg SO2 eq/kWh	1966.11		7.53526e-18	PDF*yr/kg SO2	1.48152e-14	PDF*y
Fuel from sites	3.96441e+06	KwH	Water use	Water consumption	[5]	0.0020952	m3/kWh	8306.23	m^3	6.31516e-16	pdf*yr/m^3	5.24551e-12	PDF*y
Fuel from sites	3.96441e+06	KwH	GHG	Global Warming-Terrestrial ecosystems	[41]	0.21364	kgCO2e/kWh	846957	kg CO2	1.75983e-15	pdf*yr/kg CO2e	1.4905e-09	PDF*y
Land holdings	7.57169e+06	m^2 annual crop equivalent	Land use	Land use- occupation	NA	1	/	1	m^2 annual crop eq	2.88908e-16	pdf-eq/m^2	2.88908e-16	pdf-eq
Water waste	16874.4	m^3	GHG	Global Warming-Aquatic ecosystems	[41]	0.272	kgCO2e/m3	4589.82	kg CO2	0	pdf*yr/kg CO2e	0	PDF*y
Water waste	16874.4	m^3	GHG	Global Warming-Terrestrial ecosystems	[41]	0.272	kg CO2e/m^3	4589.82	kg CO2	1.75983e-15	pdf*yr/kg CO2e	8.07731e-12	PDF*y
Renewable electricity	1845897	KwH	Air pollution	Photochemical ozone formation- terrestrial ecosystems	[4]	0.000149822	kg NMVOC/kWh	276.556	kg NMVOC to air	6e-16	PDF*yr/kg NMVOC	1.65934e-13	PDF*y
Grid electricity	1845897	KwH	Air pollution	Photochemical ozone formation- terrestrial ecosystems	[4]	6.51924e-05	kg NMVOC/kWh	120.338	kg NMVOC to air	6e-16	PDF*yr/kg NMVOC	7.2203e-14	PDF*y
Fuel from sites	3.96441e+06	KwH	Air pollution	Photochemical ozone formation- terrestrial ecosystems	[4]	0.000225	kg NMVOC/kWh	891.992	kg NMVOC to air	6e-16	PDF*yr/kg NMVOC	5.35195e-13	PDF*y
General waste	64.548	tonnes	GHG	Global Warming-Terrestrial ecosystems	[5]	446.204	kg CO2e/tonne	28801.6	kg CO2	1.75983e-15	pdf*yr/kg CO2e	5.06859e-11	PDF*y
General waste	64.548	tonnes	GHG	Global Warming-Aquatic ecosystems	[5]	446.204	kg CO2e/tonne	28801.6	kg CO2	0	pdf*yr/kg CO2e	0	PDF*y
Renewable electricity	1845897	KwH	Water pollution	Eutrophication-Freshwater Ecosytems	[4]	2.05173e-05	kg P eq/kWh	37.8729	kg P to water	8.73658e-14	pdf*yr/kg P to water	3.3088e-12	PDF*yr
Grid electricity	1845897	KwH	Water pollution	Eutrophication-Freshwater Ecosytems	[4]	8.90562e-05	kg P eq/kWh	164.389	kg P to water	8.73658e-14	pdf*yr/kg P to water	1.43619e-11	PDF*yr
Fuel from sites	3.96441e+06	KwH	Water pollution	Eutrophication-Freshwater Ecosytems	[4]	0.0002	kg P eq/kWh	792.882	kg P to water	8.73658e-14	pdf*yr/kg P to water	6.92708e-11	PDF*yr
Within-scope footprint (grid electricity, onsite land use)												2.46723e-09	PDF*yr
Within-scope footprint (renewable electricity, onsite land use)												1.79964e-09	PDF*yr
Grid Electricity impacts												8.3339e-10	PDF*yr
Renewable electricity impacts												1.65799e-10	PDF*yr
Fuel impacts												1.56581e-09	PDF*yr
Table 3: Mid point impacts per electricity source
Source	Percentage of UK energy mix, scaled to 100%	Percentage of renewable energy mix, scaled to 100%	Carbon footprint	Water footprint	Land footprint	Freshwater and terrestrial acidification	Freshwater ecotoxicity CTU/kWh	freshwater eutrophication	Marine eutrophication	Photochemical ozone formation
Unit	%	%	Kg of CO2eq/kWh	M^3/kWH	m^2/kWh	mol H+ Eq/kWh	CTU/kWh	kgP-Eq/kWh	kg N-eq/kWh	(kg NMVOC-)/kWh
Source	[3]	[3]	[5]	[5]	[5]	[4]	[4]	[4]	[4]	[4]
Coal	0.0160085	0	0.82	0.00413301	0.005	0.00173	0.472	0.000489	0.000514	0.00125
Natural Gas	0.410886	0	0.49	0.0020952	0.0002	0.000362	0.116	1.97e-05	4.96e-05	0.000225
Nuclear	0.165422	0.288641	0.012	0.000892122	0.0001	4.28e-05	0.027	6.45e-06	8.2e-05	2.65e-05
Hydro	0.0192102	0.0335196	0.024	0.0334989	0.01	0.000415	0.397	1.26e-05	1.26e-05	0.000385
Bioenergy	0.0554963	0.0968343	0.23	0.127045	0.5	NA	NA	NA	NA	NA
Wind: Onshore	0.14301	0.249534	0.011	0.000425813	0.001	5.28e-05	0.0748	6.67e-06	1.39e-05	4.63e-05
Wind: Offshore	0.14301	0.249534	0.012	0.000426053	0.001	0.0001	0.0662	6.98e-06	2.84e-05	8.99e-05
Solar PV	0.0469584	0.0819367	0.048	0.000645573	0.01	0.000301	0.0791	2.84e-05	4.62e-05	0.00013
Total impact (normal grid)	1	/	0.235215	0.00892083	0.0288746	0.000227474	0.0911904	2.05173e-05	5.06337e-05	0.000149822
Total impact (renewable)	/	1	0.0362123	0.0139482	0.0500996	8.90562e-05	0.0627661	8.01723e-06	3.84317e-05	6.51924e-05
Table 4(a): Direct Land use
Condition	m2	RECIPE			LC-IMPACT
		Land use type	Annual crop equivalent	Area (m^2 annual crop eq)	Land use type	Annual crop equivalent	Area (m^2 annual crop eq)
Natural/Undisturbed	2600	Pasture	0.55	1430	Pasture	0.504	1310.4
Natural Planted	1055.25	Permanent crops	0.7	738.675	Annual crops	1	1055.25
Grass	19620.4	Permanent crops	0.7	13734.3	Annual crops	1	19620.4
Built Environment	15180.7	Artificial area	0.73	11081.9	Urban	1.06	16091.5
Paths	7520	Artificial area	0.73	5489.6	Urban	1.06	7971.2
Total	45976.4			32474.5			46153
Table 4(b): Indirect Land use
Site	m2	RECIPE m^2annual crop eq	LC-IMPACT m^2annual crop eq
Total	9.13376e+06	7.81186e+06	7.57169e+06
Table 4(b): Electricity-based Land use
Activity type	Value (kWh)	Conversion factor valuem2/kwh	m^2 elecricity consumption per kwh	RECIPE values per kwh			LC-IMPACT values per kwh
				Land use type	Annual crop equivalent	Area (m^2 annual crop eq)	Land use type	Annual crop equivalent	Area (m^2 annual crop eq)
Grid electricity	1845897	0.0288746	53299.5	Artificial area	0.73	38908.7	Urban	1.06	56700
Renewable	1845897	0.0500996	92478.8	Artificial area	0.73	67509.5	Urban	1.06	98400
Fuel	3.96441e+06	0.0002	792.882	Artificial area	0.73	578.804	Urban	1.06	844

## Sheet: 3a. Trajectories- Recipe
Table 1: Future climate and biodiversity trajectories, ReCiPe
Activity		Fuel Savings (%)										Electricity Savings (%)										Fuel Savings- lower Bound			Fuel Savings- Upper Bound			Fuel Savings- Median Bound			Electricity Savings- lower Bound			Electricity Savings- upper Bound			Electricity Savings- median		Additional electricity requirements, lower bound										Additional electricity requirements, lower bound
Phase of planned works	Year	Reference Planned work	Lower Bound	Adjusted Baseline	Cumulative fuel savings (based on adjusted baseline) (lower bound)	Upper Bound	Adjusted baseline	Cumulative fuel savings	Median Savings	Adjusted baseline	Cumulative fuel savings	Lower bound	Adjusted Baseline	Cumulative electricity savings	Upper Bound	Adjusted baseline	Cumulative electricity savings	Median Savings	Adjusted baseline	Cumulative electricity savings	kwH	Carbon	biodiversity	kwH	Carbon	biodiversity	kwh	Carbon	biodiversity	kwh	Carbon	biodiversity	kwh	Carbon	biodiversity	kwh	Carbon	biodiversity	Fuel converted to electricity (%, from fuel baseline)	additional savings, lower bound	Adjusted Baseline	Cumulative fuel savings (based on adjusted baseline) (lower bound)	electricity requirement from fuel	conversion into electricity kwh	additional requirement from air source heat pumps	additional requirement from ground source heat pumps	additional requirement from boilers	total kwh requirement	Fuel converted to electricity (%, from fuel baseline)
BASELINE	2022	NA		1			1			1			1			1			1																				0	0	1		0	0				0	0
Phase 1 Energy Monitoring	2022	Installing meters to measure Heat and Electric at point of use (Per Staircase)	0	1	0	0	1	0	0	1		0	1	0	0	1	0	0	1	0	0	0	0	0	0	0	0	0	0	0	0	0	0	0	0	0	0	0	0	0	1	0	0	0	0	0	0	0	0
Phase 1 Energy Monitoring	2023	Heating Occupancy (EyeSeaGreen)	0.11	0.89	0.11	0.34	0.66	0.34	0.225	0.775	0.225	0	1	0	0	1	0	0	1	0	436085	93165.2	0.00038182	1.3479e+06	287965	0.00118017	891992	190565	0.000780995	0	0	0	0	0	0	0	0	0	0	0	1	0	0	0	0	0	0	0	0
Phase 2 Surveys	2023	Electric Metering Survey	0	0.89	0.11	0	0.66	0.34	0	0.775	0.225	0	1	0	0	1	0	0	1	0	436085	93165.2	0.00038182	1.3479e+06	287965	0.00118017	891992	190565	0.000780995	0	0	0	0	0	0	0	0	0	0	0	1	0	0	0	0	0	0	0	0
Phase 2 Surveys	2023	Loft Surveys	0	0.89	0.11	0	0.66	0.34	0	0.775	0.225	0	1	0	0	1	0	0	1	0	436085	93165.2	0.00038182	1.3479e+06	287965	0.00118017	891992	190565	0.000780995	0	0	0	0	0	0	0	0	0	0	0	1	0	0	0	0	0	0	0	0
Phase 2 Surveys	2024	Window Surveys	0	0.89	0.11	0	0.66	0.34	0	0.775	0.225	0	1	0	0	1	0	0	1	0	436085	93165.2	0.00038182	1.3479e+06	287965	0.00118017	891992	190565	0.000780995	0	0	0	0	0	0	0	0	0	0	0	1	0	0	0	0	0	0	0	0
Phase 2 Surveys	2024	Building fabric	0	0.89	0.11	0	0.66	0.34	0	0.775	0.225	0	1	0	0	1	0	0	1	0	436085	93165.2	0.00038182	1.3479e+06	287965	0.00118017	891992	190565	0.000780995	0	0	0	0	0	0	0	0	0	0	0	1	0	0	0	0	0	0	0	0
Phase 2 Surveys	2024	Pipes	0	0.89	0.11	0	0.66	0.34	0	0.775	0.225	0	1	0	0	1	0	0	1	0	436085	93165.2	0.00038182	1.3479e+06	287965	0.00118017	891992	190565	0.000780995	0	0	0	0	0	0	0	0	0	0	0	1	0	0	0	0	0	0	0	0
Phase 2 Surveys	2025	Pumps	0	0.89	0.11	0	0.66	0.34	0	0.775	0.225	0	1	0	0	1	0	0	1	0	436085	93165.2	0.00038182	1.3479e+06	287965	0.00118017	891992	190565	0.000780995	0	0	0	0	0	0	0	0	0	0	0	1	0	0	0	0	0	0	0	0
Phase 3 Improve Building Fabric	2025	Windows replace glazing with Vacuum (Grade 2 Listed) & Secondary and Triple where appropriate.	0.056	0.84016	0.15984	0.153	0.55902	0.44098	0.1045	0.694012	0.305988	0	1	0	0	1	0	0	1	0	633671	135378	0.000554819	1.74823e+06	373491	0.00153068	1.21306e+06	259158	0.00106211	0	0	0	0	0	0	0	0	0	0	0	1	0	0	0	0	0	0	0	0
Phase 3 Improve Building Fabric	2025	Designing and constructing/fitting Heritage Shutters HMR & Front Quad	0	0.84016	0.15984	0	0.55902	0.44098	0	0.694012	0.305988	0	1	0	0	1	0	0	1	0	633671	135378	0.000554819	1.74823e+06	373491	0.00153068	1.21306e+06	259158	0.00106211	0	0	0	0	0	0	0	0	0	0	0	1	0	0	0	0	0	0	0	0
Phase 3 Improve Building Fabric	2025	Insulate Lofts	0.039	0.807394	0.192606	0.17	0.463987	0.536013	0.1045	0.621488	0.378512	0	1	0	0	1	0	0	1	0	763570	163129	0.000668554	2.12498e+06	453980	0.00186055	1.50058e+06	320583	0.00131385	0	0	0	0	0	0	0	0	0	0	0	1	0	0	0	0	0	0	0	0
Phase 3 Improve Building Fabric	2025	Seal Air Gaps	0.02	0.791246	0.208754	0.13	0.403668	0.596332	0.075	0.574877	0.425123	0	1	0	0	1	0	0	1	0	827587	176806	0.000724604	2.3641e+06	505067	0.00206992	1.68536e+06	360061	0.00147564	0	0	0	0	0	0	0	0	0	0	0	1	0	0	0	0	0	0	0	0
Phase 3 Improve Building Fabric	2026	Window apertures/architraves (sealing/draught proofing)	0	0.791246	0.208754	0	0.403668	0.596332	0	0.574877	0.425123	0	1	0	0	1	0	0	1	0	827587	176806	0.000724604	2.3641e+06	505067	0.00206992	1.68536e+06	360061	0.00147564	0	0	0	0	0	0	0	0	0	0	0	1	0	0	0	0	0	0	0	0
Phase 3 Improve Building Fabric	2026	Suspended Floors Spraying (Q Bot)	0.088	0.721616	0.278384	0.25	0.302751	0.697249	0.169	0.477722	0.522278	0	1	0	0	1	0	0	1	0	1.10363e+06	235779	0.000966295	2.76418e+06	590540	0.00242021	2.07052e+06	442347	0.00181287	0	0	0	0	0	0	0	0	0	0	0	1	0	0	0	0	0	0	0	0
Phase 3 Improve Building Fabric	2026	Insulate Cold Bridges	0	0.721616	0.278384	0	0.302751	0.697249	0	0.477722	0.522278	0	1	0	0	1	0	0	1	0	1.10363e+06	235779	0.000966295	2.76418e+06	590540	0.00242021	2.07052e+06	442347	0.00181287	0	0	0	0	0	0	0	0	0	0	0	1	0	0	0	0	0	0	0	0
Phase 3 Improve Building Fabric	2026	Adding internal Insulation on Cold External walls plus plastering and decoration	0.132	0.626363	0.373637	0.68	0.0968804	0.90312	0.406	0.283767	0.716233	0	1	0	0	1	0	0	1	0	1.48125e+06	316454	0.00129693	3.58034e+06	764903	0.00313481	2.83944e+06	606618	0.00248611	0	0	0	0	0	0	0	0	0	0	0	1	0	0	0	0	0	0	0	0
Phase 3 Improve Building Fabric	2026	Cavity Wall Insulation	0.073	0.580638	0.419362	0.155	0.0818639	0.918136	0.114	0.251418	0.748582	0	1	0	0	1	0	0	1	0	1.66252e+06	355181	0.00145564	3.63987e+06	777622	0.00318693	2.96769e+06	634017	0.0025984	0	0	0	0	0	0	0	0	0	0	0	1	0	0	0	0	0	0	0	0
Phase 3 Improve Building Fabric	2027	External Doors (Glass)	0	0.580638	0.419362	0	0.0818639	0.918136	0	0.251418	0.748582	0	1	0	0	1	0	0	1	0	1.66252e+06	355181	0.00145564	3.63987e+06	777622	0.00318693	2.96769e+06	634017	0.0025984	0	0	0	0	0	0	0	0	0	0	0	1	0	0	0	0	0	0	0	0
Phase 4 Energy Reduction	2027	Lagging of Heating pipes	0.03	0.563219	0.436781	0.04	0.0785894	0.921411	0.035	0.242618	0.757382	0	1	0	0	1	0	0	1	0	1.73158e+06	369934	0.00151611	3.65285e+06	780395	0.0031983	3.00257e+06	641470	0.00262894	0	0	0	0	0	0	0	0	0	0	0	1	0	0	0	0	0	0	0	0
Phase 4 Energy Reduction	2027	Lagging of Hot Water Pipes	0.03	0.546323	0.453677	0.04	0.0754458	0.924554	0.035	0.234126	0.765874	0	1	0	0	1	0	0	1	0	1.79856e+06	384245	0.00157475	3.66531e+06	783057	0.00320921	3.03624e+06	648662	0.00265842	0	0	0	0	0	0	0	0	0	0	0	1	0	0	0	0	0	0	0	0
Phase 4 Energy Reduction	2027	Replace Pumps	0	0.546323	0.453677	0	0.0754458	0.924554	0	0.234126	0.765874	0.003	0.997	0.003	0.05	0.95	0.05	0.0265	0.9735	0.0265	1.79856e+06	384245	0.00157475	3.66531e+06	783057	0.00320921	3.03624e+06	648662	0.00265842	5537.69	908.156	5.16304e-06	92294.9	15135.9	8.60506e-05	48916.3	8022.05	4.56068e-05	0	0	1	0	0	0	0	0	0	0	0
Phase 4 Energy Reduction	2027	Upgrading Fridges	0	0.546323	0.453677	0	0.0754458	0.924554	0	0.234126	0.765874	0.0286	0.968486	0.0315142	0.0286	0.92283	0.07717	0.0286	0.945658	0.0543421	1.79856e+06	384245	0.00157475	3.66531e+06	783057	0.00320921	3.03624e+06	648662	0.00265842	58172	9539.94	5.42363e-05	142448	23360.8	0.000132811	100310	16450.4	9.35234e-05	0	0	1	0	0	0	0	0	0	0	0
Phase 4 Energy Reduction	2028	Upgrading Ovens	0	0.546323	0.453677	0	0.0754458	0.924554	0	0.234126	0.765874	0.00272	0.965852	0.0341485	0.00272	0.92032	0.0796801	0.00272	0.943086	0.0569143	1.79856e+06	384245	0.00157475	3.66531e+06	783057	0.00320921	3.03624e+06	648662	0.00265842	63034.6	9330.54	5.69596e-05	147081	21771.3	0.000132906	105058	15550.9	9.49329e-05	0	0	1	0	0	0	0	0	0	0	0
Phase 4 Energy Reduction	2028	Upgrading Hobs	0	0.546323	0.453677	0	0.0754458	0.924554	0	0.234126	0.765874	0.00272	0.963224	0.0367756	0.00272	0.917817	0.0821834	0.00272	0.940521	0.0594795	1.79856e+06	384245	0.00157475	3.66531e+06	783057	0.00320921	3.03624e+06	648662	0.00265842	67884	10048.4	6.13416e-05	151702	22455.3	0.000137082	109793	16251.8	9.92117e-05	0	0	1	0	0	0	0	0	0	0	0
Phase 4 Energy Reduction	2028	Upgrading Washing Machine	0	0.546323	0.453677	0	0.0754458	0.924554	0	0.234126	0.765874	0.002142	0.961161	0.0388388	0.002142	0.915851	0.0841493	0.002142	0.938506	0.0614941	1.79856e+06	384245	0.00157475	3.66531e+06	783057	0.00320921	3.03624e+06	648662	0.00265842	71692.5	10612.1	6.47831e-05	155331	22992.5	0.000140361	113512	16802.3	0.000102572	0	0	1	0	0	0	0	0	0	0	0
Phase 4 Energy Reduction	2028	Upgrade HVAC units	0	0.546323	0.453677	0	0.0754458	0.924554	0	0.234126	0.765874	0	0.961161	0.0388388	0	0.915851	0.0841493	0	0.938506	0.0614941	1.79856e+06	384245	0.00157475	3.66531e+06	783057	0.00320921	3.03624e+06	648662	0.00265842	71692.5	10612.1	6.47831e-05	155331	22992.5	0.000140361	113512	16802.3	0.000102572	0	0	1	0	0	0	0	0	0	0	0
Phase 4 Energy Reduction	2028	LED Bulp & Fitting Replacement (Works Project)	0	0.546323	0.453677	0	0.0754458	0.924554	0	0.234126	0.765874	0.015	0.946744	0.0532562	0.04	0.879217	0.120783	0.0275	0.912697	0.087303	1.79856e+06	384245	0.00157475	3.66531e+06	783057	0.00320921	3.03624e+06	648662	0.00265842	98305.5	14551.4	8.88313e-05	222954	33002.2	0.000201466	161152	23854.2	0.000145621	0	0	1	0	0	0	0	0	0	0	0
Phase 4 Energy Reduction	2029	Lighting Occupancy (SALTO)	0	0.546323	0.453677	0	0.0754458	0.924554	0	0.234126	0.765874	0.0025	0.944377	0.0556231	0.045	0.839652	0.160348	0.02375	0.89102	0.10898	1.79856e+06	384245	0.00157475	3.66531e+06	783057	0.00320921	3.03624e+06	648662	0.00265842	102675	13558.1	8.98304e-05	295986	39084.9	0.00025896	201165	26563.8	0.000176	0	0	1	0	0	0	0	0	0	0	0
Phase 4 Energy Reduction	2029	Underfloor Heating required when using Ground source heat pumps	0	0.546323	0.453677	0	0.0754458	0.924554	0	0.234126	0.765874	0	0.944377	0.0556231	0	0.839652	0.160348	0	0.89102	0.10898	1.79856e+06	384245	0.00157475	3.66531e+06	783057	0.00320921	3.03624e+06	648662	0.00265842	102675	13558.1	8.98304e-05	295986	39084.9	0.00025896	201165	26563.8	0.000176	0	0	1	0	0	0	0	0	0	0	0
Phase 4 Energy Reduction	2029	Replacement Larger radiators required when using ground source heat pumps as heat source	0	0.546323	0.453677	0	0.0754458	0.924554	0	0.234126	0.765874	0	0.944377	0.0556231	0	0.839652	0.160348	0	0.89102	0.10898	1.79856e+06	384245	0.00157475	3.66531e+06	783057	0.00320921	3.03624e+06	648662	0.00265842	102675	13558.1	8.98304e-05	295986	39084.9	0.00025896	201165	26563.8	0.000176	0	0	1	0	0	0	0	0	0	0	0
Phase 4 Energy Reduction	2029	Carpets/carpet Tiles replacements as carpets to be removed to fit unde floor heating	0	0.546323	0.453677	0	0.0754458	0.924554	0	0.234126	0.765874	0	0.944377	0.0556231	0	0.839652	0.160348	0	0.89102	0.10898	1.79856e+06	384245	0.00157475	3.66531e+06	783057	0.00320921	3.03624e+06	648662	0.00265842	102675	13558.1	8.98304e-05	295986	39084.9	0.00025896	201165	26563.8	0.000176	0	0	1	0	0	0	0	0	0	0	0
Phase 4 Energy Reduction	2029	TREND BMS upgrade	0	0.546323	0.453677	0	0.0754458	0.924554	0	0.234126	0.765874	0	0.944377	0.0556231	0	0.839652	0.160348	0	0.89102	0.10898	1.79856e+06	384245	0.00157475	3.66531e+06	783057	0.00320921	3.03624e+06	648662	0.00265842	102675	13558.1	8.98304e-05	295986	39084.9	0.00025896	201165	26563.8	0.000176	0	0	1	0	0	0	0	0	0	0	0
Phase 4 Energy Reduction	2030	All Day Storage heaters run by air source heat pumps	0	0.546323	0.453677	0	0.0754458	0.924554	0	0.234126	0.765874	0	0.944377	0.0556231	0	0.839652	0.160348	0	0.89102	0.10898	1.79856e+06	384245	0.00157475	3.66531e+06	783057	0.00320921	3.03624e+06	648662	0.00265842	102675	11918.1	8.68816e-05	295986	34357.1	0.000250459	201165	23350.6	0.000170223	0	0	1	0	0	0	0	0	0	0	0
Phase 5 Install Sustainble Energy Generation Solutions	2030	Electric Boilers	0.25		0.590258	0.25		0.943416	0.25		0.824405	0	0.944377	0.0556231	0	0.839652	0.160348	0	0.89102	0.10898	2.34003e+06	499923	0.00204884	3.74009e+06	799032	0.00327468	3.26828e+06	698236	0.00286158	102675	11918.1	8.68816e-05	295986	34357.1	0.000250459	201165	23350.6	0.000170223	0.136581	0	1	0	0.136581	541462	-59940.4	-79367.4	-102550	-241857	0.0188615
Phase 5 Install Sustainble Energy Genration Solutions	2030	Ground Source Heat Pumps (DWB, Parks Road & Merifield)	0.45		0.836103	0.45		0.977366	0.45		0.929762	0	0.944377	0.0556231	0	0.839652	0.160348	0	0.89102	0.10898	3.31466e+06	708143	0.00290219	3.87468e+06	827787	0.00339253	3.68596e+06	787468	0.00322729	102675	11918.1	8.68816e-05	295986	34357.1	0.000250459	201165	23350.6	0.000170223	0.382426	0	1	0	0.382426	1.51609e+06	-167833	-222229	-287139	-677201	0.0528121
Phase 5 Install Sustainble Energy Genration Solutions	2031	Air Source Heat Pumps (DWB, Parks Road & Merifield)	0.3		1	0.3		1	0.3		1	0	0.944377	0.0556231	0	0.839652	0.160348	0	0.89102	0.10898	3.96441e+06	846957	0.00347109	3.96441e+06	846957	0.00347109	3.96441e+06	846957	0.00347109	102675	10278.1	8.39328e-05	295986	29629.4	0.000241958	201165	20137.4	0.000164445	0.546323	0	1	0	0.546323	2.16585e+06	-239762	-317470	-410198	-967430	0.0754458
Phase 5 Install Sustainble Energy Genration Solutions	2031	PV (Solar Panels) small arrays some to generate electricity most to generate hot water	0		1	0		1	0		1	0.041	0.905657	0.0943426	0.08	0.77248	0.22752	0.0605	0.837114	0.162886	3.96441e+06	846957	0.00347109	3.96441e+06	846957	0.00347109	3.96441e+06	846957	0.00347109	174147	17432.8	0.000142359	419979	42041.5	0.000343318	300671	30098.4	0.000245788	0.546323	0	1	0	0.546323	2.16585e+06	-239762	-317470	-410198	-967430	0.0754458
Phase 5 Install Sustainble Energy Generation Solutions	2031	SunAmp Cubes (Parks Road £340,000 Merifield £50,000 DWB £100,000) to replace Calorifiers	0		1	0		1	0		1	0	0.905657	0.0943426	0	0.77248	0.22752	0	0.837114	0.162886	3.96441e+06	846957	0.00347109	3.96441e+06	846957	0.00347109	3.96441e+06	846957	0.00347109	174147	17432.8	0.000142359	419979	42041.5	0.000343318	300671	30098.4	0.000245788	0.546323	0	1	0	0.546323	2.16585e+06	-239762	-317470	-410198	-967430	0.0754458
Phase 5 Install Sustainble Energy Genration Solutions	2031	Upgrade of Love Lane Transformer by SSE should it be required	0		1	0		1	0		1	0.0052	0.900948	0.099052	0.0052	0.768463	0.231537	0.0052	0.832761	0.167239	3.96441e+06	846957	0.00347109	3.96441e+06	846957	0.00347109	3.96441e+06	846957	0.00347109	182840	18303	0.000149465	427394	42783.8	0.000349379	308706	30902.7	0.000252357	0.546323	0	1	0	0.546323	2.16585e+06	-239762	-317470	-410198	-967430	0.0754458
Phase 5 Install Sustainble Energy Genration Solutions	2031	Landscaping due to ground source heat pump installing and changes to underground services	0		1	0		1	0		1	0	0.900948	0.099052	0	0.768463	0.231537	0	0.832761	0.167239	3.96441e+06	846957	0.00347109	3.96441e+06	846957	0.00347109	3.96441e+06	846957	0.00347109	182840	18303	0.000149465	427394	42783.8	0.000349379	308706	30902.7	0.000252357	0.546323	0	1	0	0.546323	2.16585e+06	-239762	-317470	-410198	-967430	0.0754458
Phase 5 Install Sustainble Energy Genration Solutions	2032	Upgrading of services pipework (Electric, Water, Gas pipe and meter removal and changes to Sewerage system	0		1	0		1	0		1	0	0.900948	0.099052	0	0.768463	0.231537	0	0.832761	0.167239	3.96441e+06	846957	0.00347109	3.96441e+06	846957	0.00347109	3.96441e+06	846957	0.00347109	182840	15382.5	0.000144214	427394	35957.1	0.000337104	308706	25971.8	0.00024349	0.546323	0	1	0	0.546323	2.16585e+06	-239762	-317470	-410198	-967430	0.0754458
Extrapolated	2033	NA	0		1	0		1	0		1	0	0.900948	0.099052	0	0.768463	0.231537	0	0.832761	0.167239	3.96441e+06	846957	0.00347109	3.96441e+06	846957	0.00347109	3.96441e+06	846957	0.00347109	182840	12462	0.000138963	427394	29130.3	0.00032483	308706	21040.8	0.000234624	0.546323	0	1	0	0.546323	2.16585e+06	-239762	-317470	-410198	-967430	0.0754458
Extrapolated	2034	NA	0		1	0		1	0		1	0	0.900948	0.099052	0	0.768463	0.231537	0	0.832761	0.167239	3.96441e+06	846957	0.00347109	3.96441e+06	846957	0.00347109	3.96441e+06	846957	0.00347109	182840	9541.53	0.000133711	427394	22303.6	0.000312555	308706	16109.9	0.000225758	0.546323	0	1	0	0.546323	2.16585e+06	-239762	-317470	-410198	-967430	0.0754458
Extrapolated	2035	NA	0		1	0		1	0		1	0	0.900948	0.099052	0	0.768463	0.231537	0	0.832761	0.167239	3.96441e+06	846957	0.00347109	3.96441e+06	846957	0.00347109	3.96441e+06	846957	0.00347109	182840	6621.05	0.00012846	427394	15476.9	0.00030028	308706	11179	0.000216892	0.546323	0	1	0	0.546323	2.16585e+06	-239762	-317470	-410198	-967430	0.0754458
Table 2: Additional electricity requirements for sustainable energy generation methods
		Percentage fuel savings (%)			Efficiency of sustainable energy generation solutions
	Name	lower bound	upper bound	median
	Electric boiler	0.25	0.25	0.25	-0.757576
	GSHP	0.45	0.45	0.45	-0.325733
	ASHP	0.3	0.3	0.3	-0.369004
Table 3: Carbon/biodiversity intensities per KwH per year
	Year	Total KwH	Carbon	biodiversity	change in BAU Carbon	change in BAU biodiv
electricity	2022	1845897	0.24386	1.07595e-09	0	0
	2023	1845897	0.227887	1.04723e-09	29484.3	5.30144e-05
	2024	1845897	0.211914	1.01851e-09	58968.7	0.000106029
	2025	1845897	0.195941	9.89785e-10	88453	0.000159043
	2026	1845897	0.179968	9.61065e-10	117937	0.000212058
	2027	1845897	0.163995	9.32345e-10	147422	0.000265072
	2028	1845897	0.148023	9.03625e-10	176906	0.000318086
	2029	1845897	0.13205	8.74905e-10	206390	0.000371101
	2030	1845897	0.116077	8.46184e-10	235875	0.000424115
	2031	1845897	0.100104	8.17464e-10	265359	0.00047713
	2032	1845897	0.084131	7.88744e-10	294843	0.000530144
	2033	1845897	0.0681581	7.60024e-10	324328	0.000583158
	2034	1845897	0.0521852	7.31304e-10	353812	0.000636173
	2035	1845897	0.0362123	7.02584e-10	383296	0.000689187
	Fuel	3.96441e+06	0.21364	8.75563e-10
[truncated: 42 more columns]

## Sheet: 3b. Trajectories- LC-IMPACT
Table 1: Future climate and biodiversity trajectories, LC-IMPACT
Activity		Fuel Savings (%)										Electricity Savings (%)										Fuel Savings- lower Bound			Fuel Savings- Upper Bound			Fuel Savings- Median Bound			Electricity Savings- lower Bound			Electricity Savings- upper Bound			Electricity Savings- median		Additional electricity requirements, lower bound										Additional electricity requirements, lower bound
Phase of planned works	Year	Reference Planned work	Lower Bound	Adjusted Baseline	Cumulative fuel savings (based on adjusted baseline) (lower bound)	Upper Bound	Adjusted baseline	Cumulative fuel savings	Median Savings	Adjusted baseline	Cumulative fuel savings	Lower bound	Adjusted Baseline	Cumulative electricity savings	Upper Bound	Adjusted baseline	Cumulative electricity savings	Median Savings	Adjusted baseline	Cumulative electricity savings	kwH	Carbon	biodiversity	kwH	Carbon	biodiversity	kwh	Carbon	biodiversity	kwh	Carbon	biodiversity	kwh	Carbon	biodiversity	kwh	Carbon	biodiversity	Fuel converted to electricity (%, from fuel baseline)	additional savings, lower bound	Adjusted Baseline	Cumulative fuel savings (based on adjusted baseline) (lower bound)	electricity requirement from fuel	conversion into electricity kwh	additional requirement from air source heat pumps	additional requirement from ground source heat pumps	additional requirement from boilers	total kwh requirement	Fuel converted to electricity (%, from fuel baseline)
BASELINE	2022	NA		1			1			1			1			1			1																				0	0	1		0	0				0	0
Phase 1 Energy Monitoring	2022	Installing meters to measure Heat and Electric at point of use (Per Staircase)	0	1	0	0	1	0	0	1		0	1	0	0	1	0	0	1	0	0	0	0	0	0	0	0	0	0	0	0	0	0	0	0	0	0	0	0	0	1	0	0	0	0	0	0	0	0
Phase 1 Energy Monitoring	2023	Heating Occupancy (EyeSeaGreen)	0.11	0.89	0.11	0.34	0.66	0.34	0.225	0.775	0.225	0	1	0	0	1	0	0	1	0	436085	93165.2	1.72239e-10	1.3479e+06	287965	5.32376e-10	891992	190565	3.52307e-10	0	0	0	0	0	0	0	0	0	0	0	1	0	0	0	0	0	0	0	0
Phase 2 Surveys	2023	Electric Metering Survey	0	0.89	0.11	0	0.66	0.34	0	0.775	0.225	0	1	0	0	1	0	0	1	0	436085	93165.2	1.72239e-10	1.3479e+06	287965	5.32376e-10	891992	190565	3.52307e-10	0	0	0	0	0	0	0	0	0	0	0	1	0	0	0	0	0	0	0	0
Phase 2 Surveys	2023	Loft Surveys	0	0.89	0.11	0	0.66	0.34	0	0.775	0.225	0	1	0	0	1	0	0	1	0	436085	93165.2	1.72239e-10	1.3479e+06	287965	5.32376e-10	891992	190565	3.52307e-10	0	0	0	0	0	0	0	0	0	0	0	1	0	0	0	0	0	0	0	0
Phase 2 Surveys	2024	Window Surveys	0	0.89	0.11	0	0.66	0.34	0	0.775	0.225	0	1	0	0	1	0	0	1	0	436085	93165.2	1.72239e-10	1.3479e+06	287965	5.32376e-10	891992	190565	3.52307e-10	0	0	0	0	0	0	0	0	0	0	0	1	0	0	0	0	0	0	0	0
Phase 2 Surveys	2024	Building fabric	0	0.89	0.11	0	0.66	0.34	0	0.775	0.225	0	1	0	0	1	0	0	1	0	436085	93165.2	1.72239e-10	1.3479e+06	287965	5.32376e-10	891992	190565	3.52307e-10	0	0	0	0	0	0	0	0	0	0	0	1	0	0	0	0	0	0	0	0
Phase 2 Surveys	2024	Pipes	0	0.89	0.11	0	0.66	0.34	0	0.775	0.225	0	1	0	0	1	0	0	1	0	436085	93165.2	1.72239e-10	1.3479e+06	287965	5.32376e-10	891992	190565	3.52307e-10	0	0	0	0	0	0	0	0	0	0	0	1	0	0	0	0	0	0	0	0
Phase 2 Surveys	2025	Pumps	0	0.89	0.11	0	0.66	0.34	0	0.775	0.225	0	1	0	0	1	0	0	1	0	436085	93165.2	1.72239e-10	1.3479e+06	287965	5.32376e-10	891992	190565	3.52307e-10	0	0	0	0	0	0	0	0	0	0	0	1	0	0	0	0	0	0	0	0
Phase 3 Improve Building Fabric	2025	Windows replace glazing with Vacuum (Grade 2 Listed) & Secondary and Triple where appropriate.	0.056	0.84016	0.15984	0.153	0.55902	0.44098	0.1045	0.694012	0.305988	0	1	0	0	1	0	0	1	0	633671	135378	2.50279e-10	1.74823e+06	373491	6.90491e-10	1.21306e+06	259158	4.79119e-10	0	0	0	0	0	0	0	0	0	0	0	1	0	0	0	0	0	0	0	0
Phase 3 Improve Building Fabric	2025	Designing and constructing/fitting Heritage Shutters HMR & Front Quad	0	0.84016	0.15984	0	0.55902	0.44098	0	0.694012	0.305988	0	1	0	0	1	0	0	1	0	633671	135378	2.50279e-10	1.74823e+06	373491	6.90491e-10	1.21306e+06	259158	4.79119e-10	0	0	0	0	0	0	0	0	0	0	0	1	0	0	0	0	0	0	0	0
Phase 3 Improve Building Fabric	2025	Insulate Lofts	0.039	0.807394	0.192606	0.17	0.463987	0.536013	0.1045	0.621488	0.378512	0	1	0	0	1	0	0	1	0	763570	163129	3.01585e-10	2.12498e+06	453980	8.39296e-10	1.50058e+06	320583	5.92678e-10	0	0	0	0	0	0	0	0	0	0	0	1	0	0	0	0	0	0	0	0
Phase 3 Improve Building Fabric	2025	Seal Air Gaps	0.02	0.791246	0.208754	0.13	0.403668	0.596332	0.075	0.574877	0.425123	0	1	0	0	1	0	0	1	0	827587	176806	3.26869e-10	2.3641e+06	505067	9.33743e-10	1.68536e+06	360061	6.65663e-10	0	0	0	0	0	0	0	0	0	0	0	1	0	0	0	0	0	0	0	0
Phase 3 Improve Building Fabric	2026	Window apertures/architraves (sealing/draught proofing)	0	0.791246	0.208754	0	0.403668	0.596332	0	0.574877	0.425123	0	1	0	0	1	0	0	1	0	827587	176806	3.26869e-10	2.3641e+06	505067	9.33743e-10	1.68536e+06	360061	6.65663e-10	0	0	0	0	0	0	0	0	0	0	0	1	0	0	0	0	0	0	0	0
Phase 3 Improve Building Fabric	2026	Suspended Floors Spraying (Q Bot)	0.088	0.721616	0.278384	0.25	0.302751	0.697249	0.169	0.477722	0.522278	0	1	0	0	1	0	0	1	0	1.10363e+06	235779	4.35896e-10	2.76418e+06	590540	1.09176e-09	2.07052e+06	442347	8.17788e-10	0	0	0	0	0	0	0	0	0	0	0	1	0	0	0	0	0	0	0	0
Phase 3 Improve Building Fabric	2026	Insulate Cold Bridges	0	0.721616	0.278384	0	0.302751	0.697249	0	0.477722	0.522278	0	1	0	0	1	0	0	1	0	1.10363e+06	235779	4.35896e-10	2.76418e+06	590540	1.09176e-09	2.07052e+06	442347	8.17788e-10	0	0	0	0	0	0	0	0	0	0	0	1	0	0	0	0	0	0	0	0
Phase 3 Improve Building Fabric	2026	Adding internal Insulation on Cold External walls plus plastering and decoration	0.132	0.626363	0.373637	0.68	0.0968804	0.90312	0.406	0.283767	0.716233	0	1	0	0	1	0	0	1	0	1.48125e+06	316454	5.85045e-10	3.58034e+06	764903	1.41411e-09	2.83944e+06	606618	1.12149e-09	0	0	0	0	0	0	0	0	0	0	0	1	0	0	0	0	0	0	0	0
Phase 3 Improve Building Fabric	2026	Cavity Wall Insulation	0.073	0.580638	0.419362	0.155	0.0818639	0.918136	0.114	0.251418	0.748582	0	1	0	0	1	0	0	1	0	1.66252e+06	355181	6.56641e-10	3.63987e+06	777622	1.43763e-09	2.96769e+06	634017	1.17214e-09	0	0	0	0	0	0	0	0	0	0	0	1	0	0	0	0	0	0	0	0
Phase 3 Improve Building Fabric	2027	External Doors (Glass)	0	0.580638	0.419362	0	0.0818639	0.918136	0	0.251418	0.748582	0	1	0	0	1	0	0	1	0	1.66252e+06	355181	6.56641e-10	3.63987e+06	777622	1.43763e-09	2.96769e+06	634017	1.17214e-09	0	0	0	0	0	0	0	0	0	0	0	1	0	0	0	0	0	0	0	0
Phase 4 Energy Reduction	2027	Lagging of Heating pipes	0.03	0.563219	0.436781	0.04	0.0785894	0.921411	0.035	0.242618	0.757382	0	1	0	0	1	0	0	1	0	1.73158e+06	369934	6.83916e-10	3.65285e+06	780395	1.44275e-09	3.00257e+06	641470	1.18592e-09	0	0	0	0	0	0	0	0	0	0	0	1	0	0	0	0	0	0	0	0
Phase 4 Energy Reduction	2027	Lagging of Hot Water Pipes	0.03	0.546323	0.453677	0.04	0.0754458	0.924554	0.035	0.234126	0.765874	0	1	0	0	1	0	0	1	0	1.79856e+06	384245	7.10373e-10	3.66531e+06	783057	1.44768e-09	3.03624e+06	648662	1.19921e-09	0	0	0	0	0	0	0	0	0	0	0	1	0	0	0	0	0	0	0	0
Phase 4 Energy Reduction	2027	Replace Pumps	0	0.546323	0.453677	0	0.0754458	0.924554	0	0.234126	0.765874	0.003	0.997	0.003	0.05	0.95	0.05	0.0265	0.9735	0.0265	1.79856e+06	384245	7.10373e-10	3.66531e+06	783057	1.44768e-09	3.03624e+06	648662	1.19921e-09	5537.69	908.156	1.72987e-12	92294.9	15135.9	2.88312e-11	48916.3	8022.05	1.52805e-11	0	0	1	0	0	0	0	0	0	0	0
Phase 4 Energy Reduction	2027	Upgrading Fridges	0	0.546323	0.453677	0	0.0754458	0.924554	0	0.234126	0.765874	0.0286	0.968486	0.0315142	0.0286	0.92283	0.07717	0.0286	0.945658	0.0543421	1.79856e+06	384245	7.10373e-10	3.66531e+06	783057	1.44768e-09	3.03624e+06	648662	1.19921e-09	58172	9539.94	1.81718e-11	142448	23360.8	4.44981e-11	100310	16450.4	3.1335e-11	0	0	1	0	0	0	0	0	0	0	0
Phase 4 Energy Reduction	2028	Upgrading Ovens	0	0.546323	0.453677	0	0.0754458	0.924554	0	0.234126	0.765874	0.00272	0.965852	0.0341485	0.00272	0.92032	0.0796801	0.00272	0.943086	0.0569143	1.79856e+06	384245	7.10373e-10	3.66531e+06	783057	1.44768e-09	3.03624e+06	648662	1.19921e-09	63034.6	9330.54	1.79372e-11	147081	21771.3	4.18536e-11	105058	15550.9	2.98954e-11	0	0	1	0	0	0	0	0	0	0	0
Phase 4 Energy Reduction	2028	Upgrading Hobs	0	0.546323	0.453677	0	0.0754458	0.924554	0	0.234126	0.765874	0.00272	0.963224	0.0367756	0.00272	0.917817	0.0821834	0.00272	0.940521	0.0594795	1.79856e+06	384245	7.10373e-10	3.66531e+06	783057	1.44768e-09	3.03624e+06	648662	1.19921e-09	67884	10048.4	1.93172e-11	151702	22455.3	4.31685e-11	109793	16251.8	3.12428e-11	0	0	1	0	0	0	0	0	0	0	0
Phase 4 Energy Reduction	2028	Upgrading Washing Machine	0	0.546323	0.453677	0	0.0754458	0.924554	0	0.234126	0.765874	0.002142	0.961161	0.0388388	0.002142	0.915851	0.0841493	0.002142	0.938506	0.0614941	1.79856e+06	384245	7.10373e-10	3.66531e+06	783057	1.44768e-09	3.03624e+06	648662	1.19921e-09	71692.5	10612.1	2.04009e-11	155331	22992.5	4.42012e-11	113512	16802.3	3.23011e-11	0	0	1	0	0	0	0	0	0	0	0
Phase 4 Energy Reduction	2028	Upgrade HVAC units	0	0.546323	0.453677	0	0.0754458	0.924554	0	0.234126	0.765874	0	0.961161	0.0388388	0	0.915851	0.0841493	0	0.938506	0.0614941	1.79856e+06	384245	7.10373e-10	3.66531e+06	783057	1.44768e-09	3.03624e+06	648662	1.19921e-09	71692.5	10612.1	2.04009e-11	155331	22992.5	4.42012e-11	113512	16802.3	3.23011e-11	0	0	1	0	0	0	0	0	0	0	0
Phase 4 Energy Reduction	2028	LED Bulp & Fitting Replacement (Works Project)	0	0.546323	0.453677	0	0.0754458	0.924554	0	0.234126	0.765874	0.015	0.946744	0.0532562	0.04	0.879217	0.120783	0.0275	0.912697	0.087303	1.79856e+06	384245	7.10373e-10	3.66531e+06	783057	1.44768e-09	3.03624e+06	648662	1.19921e-09	98305.5	14551.4	2.7974e-11	222954	33002.2	6.3444e-11	161152	23854.2	4.58577e-11	0	0	1	0	0	0	0	0	0	0	0
Phase 4 Energy Reduction	2029	Lighting Occupancy (SALTO)	0	0.546323	0.453677	0	0.0754458	0.924554	0	0.234126	0.765874	0.0025	0.944377	0.0556231	0.045	0.839652	0.160348	0.02375	0.89102	0.10898	1.79856e+06	384245	7.10373e-10	3.66531e+06	783057	1.44768e-09	3.03624e+06	648662	1.19921e-09	102675	13558.1	2.63608e-11	295986	39084.9	7.59918e-11	201165	26563.8	5.16473e-11	0	0	1	0	0	0	0	0	0	0	0
Phase 4 Energy Reduction	2029	Underfloor Heating required when using Ground source heat pumps	0	0.546323	0.453677	0	0.0754458	0.924554	0	0.234126	0.765874	0	0.944377	0.0556231	0	0.839652	0.160348	0	0.89102	0.10898	1.79856e+06	384245	7.10373e-10	3.66531e+06	783057	1.44768e-09	3.03624e+06	648662	1.19921e-09	102675	13558.1	2.63608e-11	295986	39084.9	7.59918e-11	201165	26563.8	5.16473e-11	0	0	1	0	0	0	0	0	0	0	0
Phase 4 Energy Reduction	2029	Replacement Larger radiators required when using ground source heat pumps as heat source	0	0.546323	0.453677	0	0.0754458	0.924554	0	0.234126	0.765874	0	0.944377	0.0556231	0	0.839652	0.160348	0	0.89102	0.10898	1.79856e+06	384245	7.10373e-10	3.66531e+06	783057	1.44768e-09	3.03624e+06	648662	1.19921e-09	102675	13558.1	2.63608e-11	295986	39084.9	7.59918e-11	201165	26563.8	5.16473e-11	0	0	1	0	0	0	0	0	0	0	0
Phase 4 Energy Reduction	2029	Carpets/carpet Tiles replacements as carpets to be removed to fit unde floor heating	0	0.546323	0.453677	0	0.0754458	0.924554	0	0.234126	0.765874	0	0.944377	0.0556231	0	0.839652	0.160348	0	0.89102	0.10898	1.79856e+06	384245	7.10373e-10	3.66531e+06	783057	1.44768e-09	3.03624e+06	648662	1.19921e-09	102675	13558.1	2.63608e-11	295986	39084.9	7.59918e-11	201165	26563.8	5.16473e-11	0	0	1	0	0	0	0	0	0	0	0
Phase 4 Energy Reduction	2029	TREND BMS upgrade	0	0.546323	0.453677	0	0.0754458	0.924554	0	0.234126	0.765874	0	0.944377	0.0556231	0	0.839652	0.160348	0	0.89102	0.10898	1.79856e+06	384245	7.10373e-10	3.66531e+06	783057	1.44768e-09	3.03624e+06	648662	1.19921e-09	102675	13558.1	2.63608e-11	295986	39084.9	7.59918e-11	201165	26563.8	5.16473e-11	0	0	1	0	0	0	0	0	0	0	0
Phase 4 Energy Reduction	2030	All Day Storage heaters run by air source heat pumps	0	0.546323	0.453677	0	0.0754458	0.924554	0	0.234126	0.765874	0	0.944377	0.0556231	0	0.839652	0.160348	0	0.89102	0.10898	1.79856e+06	384245	7.10373e-10	3.66531e+06	783057	1.44768e-09	3.03624e+06	648662	1.19921e-09	102675	11918.1	2.35044e-11	295986	34357.1	6.77574e-11	201165	23350.6	4.60509e-11	0	0	1	0	0	0	0	0	0	0	0
Phase 5 Install Sustainble Energy Generation Solutions	2030	Electric Boilers	0.25		0.590258	0.25		0.943416	0.25		0.824405	0	0.944377	0.0556231	0	0.839652	0.160348	0	0.89102	0.10898	2.34003e+06	499923	9.24232e-10	3.74009e+06	799032	1.47721e-09	3.26828e+06	698236	1.29086e-09	102675	11918.1	2.35044e-11	295986	34357.1	6.77574e-11	201165	23350.6	4.60509e-11	0.136581	0	1	0	0.136581	541462	-52911.6	-184589	0	-237501	0.0188615
Phase 5 Install Sustainble Energy Genration Solutions	2030	Ground Source Heat Pumps (DWB, Parks Road & Merifield)	0.45		0.836103	0.45		0.977366	0.45		0.929762	0	0.944377	0.0556231	0	0.839652	0.160348	0	0.89102	0.10898	3.31466e+06	708143	1.30918e-09	3.87468e+06	827787	1.53037e-09	3.68596e+06	787468	1.45583e-09	102675	11918.1	2.35044e-11	295986	34357.1	6.77574e-11	201165	23350.6	4.60509e-11	0.382426	0	1	0	0.382426	1.51609e+06	-148152	-516850	0	-665002	0.0528121
Phase 5 Install Sustainble Energy Genration Solutions	2031	Air Source Heat Pumps (DWB, Parks Road & Merifield)	0.3		1	0.3		1	0.3		1	0	0.944377	0.0556231	0	0.839652	0.160348	0	0.89102	0.10898	3.96441e+06	846957	1.56581e-09	3.96441e+06	846957	1.56581e-09	3.96441e+06	846957	1.56581e-09	102675	10278.1	2.06479e-11	295986	29629.4	5.95231e-11	201165	20137.4	4.04545e-11	0.546323	0	1	0	0.546323	2.16585e+06	-211646	-738357	0	-950004	0.0754458
Phase 5 Install Sustainble Energy Genration Solutions	2031	PV (Solar Panels) small arrays some to generate electricity most to generate hot water	0		1	0		1	0		1	0.041	0.905657	0.0943426	0.08	0.77248	0.22752	0.0605	0.837114	0.162886	3.96441e+06	846957	1.56581e-09	3.96441e+06	846957	1.56581e-09	3.96441e+06	846957	1.56581e-09	174147	17432.8	3.5021e-11	419979	42041.5	8.44581e-11	300671	30098.4	6.04653e-11	0.546323	0	1	0	0.546323	2.16585e+06	-211646	-738357	0	-950004	0.0754458
Phase 5 Install Sustainble Energy Generation Solutions	2031	SunAmp Cubes (Parks Road £340,000 Merifield £50,000 DWB £100,000) to replace Calorifiers	0		1	0		1	0		1	0	0.905657	0.0943426	0	0.77248	0.22752	0	0.837114	0.162886	3.96441e+06	846957	1.56581e-09	3.96441e+06	846957	1.56581e-09	3.96441e+06	846957	1.56581e-09	174147	17432.8	3.5021e-11	419979	42041.5	8.44581e-11	300671	30098.4	6.04653e-11	0.546323	0	1	0	0.546323	2.16585e+06	-211646	-738357	0	-950004	0.0754458
Phase 5 Install Sustainble Energy Genration Solutions	2031	Upgrade of Love Lane Transformer by SSE should it be required	0		1	0		1	0		1	0.0052	0.900948	0.099052	0.0052	0.768463	0.231537	0.0052	0.832761	0.167239	3.96441e+06	846957	1.56581e-09	3.96441e+06	846957	1.56581e-09	3.96441e+06	846957	1.56581e-09	182840	18303	3.67692e-11	427394	42783.8	8.59493e-11	308706	30902.7	6.20812e-11	0.546323	0	1	0	0.546323	2.16585e+06	-211646	-738357	0	-950004	0.0754458
Phase 5 Install Sustainble Energy Genration Solutions	2031	Landscaping due to ground source heat pump installing and changes to underground services	0		1	0		1	0		1	0	0.900948	0.099052	0	0.768463	0.231537	0	0.832761	0.167239	3.96441e+06	846957	1.56581e-09	3.96441e+06	846957	1.56581e-09	3.96441e+06	846957	1.56581e-09	182840	18303	3.67692e-11	427394	42783.8	8.59493e-11	308706	30902.7	6.20812e-11	0.546323	0	1	0	0.546323	2.16585e+06	-211646	-738357	0	-950004	0.0754458
Phase 5 Install Sustainble Energy Genration Solutions	2032	Upgrading of services pipework (Electric, Water, Gas pipe and meter removal and changes to Sewerage system	0		1	0		1	0		1	0	0.900948	0.099052	0	0.768463	0.231537	0	0.832761	0.167239	3.96441e+06	846957	1.56581e-09	3.96441e+06	846957	1.56581e-09	3.96441e+06	846957	1.56581e-09	182840	15382.5	3.16826e-11	427394	35957.1	7.40591e-11	308706	25971.8	5.34929e-11	0.546323	0	1	0	0.546323	2.16585e+06	-211646	-738357	0	-950004	0.0754458
Extrapolated	2033	NA	0		1	0		1	0		1	0	0.900948	0.099052	0	0.768463	0.231537	0	0.832761	0.167239	3.96441e+06	846957	1.56581e-09	3.96441e+06	846957	1.56581e-09	3.96441e+06	846957	1.56581e-09	182840	12462	2.6596e-11	427394	29130.3	6.21689e-11	308706	21040.8	4.49046e-11	0.546323	0	1	0	0.546323	2.16585e+06	-211646	-738357	0	-950004	0.0754458
Extrapolated	2034	NA	0		1	0		1	0		1	0	0.900948	0.099052	0	0.768463	0.231537	0	0.832761	0.167239	3.96441e+06	846957	1.56581e-09	3.96441e+06	846957	1.56581e-09	3.96441e+06	846957	1.56581e-09	182840	9541.53	2.15093e-11	427394	22303.6	5.02788e-11	308706	16109.9	3.63164e-11	0.546323	0	1	0	0.546323	2.16585e+06	-211646	-738357	0	-950004	0.0754458
Extrapolated	2035	NA	0		1	0		1	0		1	0	0.900948	0.099052	0	0.768463	0.231537	0	0.832761	0.167239	3.96441e+06	846957	1.56581e-09	3.96441e+06	846957	1.56581e-09	3.96441e+06	846957	1.56581e-09	182840	6621.05	1.64227e-11	427394	15476.9	3.83886e-11	308706	11179	2.77281e-11	0.546323	0	1	0	0.546323	2.16585e+06	-211646	-738357	0	-950004	0.0754458
Table 2: Additional electricity requirements for sustainable energy generation methods
	Column1	FUEL SAVINGS PERCENTAGE	Column2	Column3	FUEL kWh equivalent	Column4	Column5	Additional electricity KWH requirement	Column6	Column7	Column8
		Percentage fuel savings (%)			Efficiency of sustainable energy generation solutions
	Name	lower bound	upper bound	median
	Electric boiler	0.25	0.25	0.25	-0.757576
	GSHP	0.45	0.45	0.45	-0.325733
	ASHP	0.3	0.3	0.3	-0.369004
Table 3: Carbon/biodiversity intensities per KwH per year
	Year	Total KwH	Carbon	biodiversity	change in BAU Carbon	change in BAU biodiv
electricity	2022	1845897	0.24386	4.51482e-16	0	0
	2023	1845897	0.227887	4.23662e-16	29484.3	5.13531e-11
	2024	1845897	0.211914	3.95842e-16	58968.7	1.02706e-10
	2025	1845897	0.195941	3.68022e-16	88453	1.54059e-10
	2026	1845897	0.179968	3.40202e-16	117937	2.05413e-10
	2027	1845897	0.163995	3.12382e-16	147422	2.56766e-10
	2028	1845897	0.148023	2.84561e-16	176906	3.08119e-10
	2029	1845897	0.13205	2.56741e-16	206390	3.59472e-10
	2030	1845897	0.116077	2.28921e-16	235875	4.10825e-10
	2031	1845897	0.100104	2.01101e-16	265359	4.62178e-10
	2032	1845897	0.084131	1.73281e-16	294843	5.13531e-10
	2033	1845897	0.0681581	1.45461e-16	324328	5.64885e-10
	2034	1845897	0.0521852	1.1764e-16	353812	6.16238e-10
	2035	1845897	0.0362123	8.98203e-17	383296	6.67591e-10
	Fuel	3.96441e+06	0.21364	3.94967e-16
[truncated: 42 more columns]

## Sheet: 4a.  Savings and Impacts
	Table 1: embodied impacts of Net Zero activities, including sources of environmental pressures. Carbon and biodiversity impacts dissagreggated by activity can be found at sheet 4(b): Impacts- detailed
	Activity	Name	More Detail	Source	Total carbon impact kg CO2e	Total biodiversity impact
	Phase 1 Energy Monitoring	Installing meters to measure Heat and Electric at point of use (Per Staircase)	NA	NA	0	0
	Phase 1 Energy Monitoring	Heating Occupancy (EyeSeaGreen)	NA	NA	0	0
	Phase 2 Surveys	Electric Metering Survey	NA	NA	0	0
	Phase 2 Surveys	Loft Surveys	NA	NA	0	0
	Phase 2 Surveys	Window Surveys	NA	NA	0	0
	Phase 2 Surveys	Building fabric	NA	NA	0	0
	Phase 2 Surveys	Pipes	NA	NA	0	0
	Phase 2 Surveys	Pumps	NA	NA	0	0
	Phase 3 Improve Building Fabric	Windows replace glazing with Vacuum (Grade 2 Listed) & Secondary and Triple where appropriate.	Solar Gard Low-E film ECOLUX 70	(The International EPD System, 2023a)	3733	2.3311e-05
	Phase 3 Improve Building Fabric	Windows replace glazing with Vacuum (Grade 2 Listed) & Secondary and Triple where appropriate.	Double glazing- aluminium	(Saadatian et al., 2021)	136696	0.000568246
	Phase 3 Improve Building Fabric	Windows replace glazing with Vacuum (Grade 2 Listed) & Secondary and Triple where appropriate.	Double glazing- wood	(Saadatian et al., 2021)	32261.6	0.000158513
	Phase 3 Improve Building Fabric	Windows replace glazing with Vacuum (Grade 2 Listed) & Secondary and Triple where appropriate.	Triple glazing- aluminium	(Saadatian et al., 2021)	144051	0.000654377
	Phase 3 Improve Building Fabric	Windows replace glazing with Vacuum (Grade 2 Listed) & Secondary and Triple where appropriate.	Triple glazing- wood	(Saadatian et al., 2021)	45216.7	0.000259851
	Phase 3 Improve Building Fabric	Designing and constructing/fitting Heritage Shutters HMR & Front Quad	Solar Shading Devices- Venetian blinds	(Ift Rosenheim GmbH, 2020).	0	0.000656614
	Phase 3 Improve Building Fabric	Insulate Lofts	Mineral Wool insulation	(Densley Tingley et al., 2015)	76048	0.000455663
	Phase 3 Improve Building Fabric	Insulate Lofts	Wood Fibre insulation	(Densley Tingley et al., 2015)	76048	0.000455663
	Phase 3 Improve Building Fabric	Seal Air Gaps	Top Gun Sealant (1414X) Europe	(The International EPD System, 2018)	13328	0.00051263
	Phase 3 Improve Building Fabric	Window apertures/architraves (sealing/draught proofing)	Silicone based products type 1 (Quattro sealant alternative)	(IBU EPD, 2022)	49646.9	0.000163238
	Phase 3 Improve Building Fabric	Window apertures/architraves (sealing/draught proofing)	Silicone based products type 2 (Quattro sealant alternative)	(IBU EPD, 2022)	57756.3	0.000210935
	Phase 3 Improve Building Fabric	Window apertures/architraves (sealing/draught proofing)	Silicone based products type 3 (Quattro sealant alternative)	(IBU EPD, 2022)	65829.6	0.000393682
	Phase 3 Improve Building Fabric	Suspended Floors Spraying (Q Bot)	Elastospray LCA- closed cell	(ASTM International, 2018)	12954.5	3.84923e-05
	Phase 3 Improve Building Fabric	Insulate cold bridges	NA	NA	0	0
	Phase 3 Improve Building Fabric	Adding internal Insulation on Cold External walls plus plastering and decoration	Phenolic Foam insulation	(Densley Tingley et al., 2015)	76637.7	0.000462981
	Phase 3 Improve Building Fabric	Adding internal Insulation on Cold External walls plus plastering and decoration	EPS insulation	(Densley Tingley et al., 2015)	64598.5	0.000342142
	Phase 3 Improve Building Fabric	Adding internal Insulation on Cold External walls plus plastering and decoration	Mineral Wool insulation	(Densley Tingley et al., 2015)	69719.7	0.000419139
	Phase 3 Improve Building Fabric	Cavity Wall Insulation	EPS insulation	(Densley Tingley et al., 2015)	352355	0.00186623
	Phase 3 Improve Building Fabric	Cavity Wall Insulation	Mineral Wool insulation	(Densley Tingley et al., 2015)	380289	0.00228621
	Phase 3 Improve Building Fabric	External Doors (Glass)	Technishield 70 40 MM Glazed door	(The International EPD System, 2022)	2705.05	0.000914993
	Phase 4 Energy Reduction	Lagging of Heating pipes	Lagging material	(BRE Global, 2021)	6504.54	3.38692e-05
	Phase 4 Energy Reduction	Lagging of Hot Water Pipes	Lagging material	(BRE Global, 2021)	6460.46	3.36397e-05
	Phase 4 Energy Reduction	Replace Pumps	MAGNA3 25 Cast Iron Pump	(IBU EPD, 2018)	6279.94	2.68929e-05
	Phase 4 Energy Reduction	Upgrading Fridges	Objet Collection refrigerator	(EPD Norway, 2022b)	113116	0.000999552
	Phase 4 Energy Reduction	Upgrading Ovens	Highly Efficient Oven 3, oven cleaner	(Landi et al., 2019)	53196	0.000288368
	Phase 4 Energy Reduction	Upgrading Hobs	Electronic boards for hob	(Elduque et al., 2014)	3194.84	2.5567e-05
	Phase 4 Energy Reduction	Upgrading Washing Machine	Washing Machine	(Alejandre et al., 2022)	724.164	2.02771e-06
	Phase 4 Energy Reduction	Upgrading HVAC units	NA	NA	0	0
	Phase 4 Energy Reduction	LED Bulp & Fitting Replacement (Works Project)	i60-1200 LED 4600 HF OP	(EPD Norway, 2023)	30453.4	0.000144689
	Phase 4 Energy Reduction	Lighting Occupancy (SALTO)	NA	NA	0	0
	Phase 4 Energy Reduction	Underfloor Heating required when using Ground source heat pumps	Underfloor heating system- Brass & Fittings, S.L.	(The International EPD System, 2021)	154756	0.000604827
	Phase 4 Energy Reduction	Replacement Larger radiators required when using ground source heat pumps as heat source	Lyngson radiator type 22 size – h500mm x L700 mm	(EPD Norway, 2022a)	5718.14	3.44804e-05
	Phase 4 Energy Reduction	Carpets/carpet Tiles replacements as carpets to be removed to fit unde floor heating	tiltnturn Carpet Tiles- Burmatex	(The International EPD System, 2023b)	247410	0.00136625
	Phase 4 Energy Reduction	Trend BMS upgrade	NA	NA	0	0
	Phase 4 Energy Reduction	All Day Storage heaters run by air source heat pumps	NA	NA	0	0
	Phase 4 Energy Reduction	Hydrogen Ready/Electric Boilers	Høiax Connected 200 Water Heater	(Shibata et al., 2023)	262460	0.000734908
	Phase 5 Install Sustainable Energy Generation Solutions	Ground Source Heat Pumps (DWB, Parks Road & Merifield)	Ground Source Heat Pump	(Saner et al., 2010)	234600	0.00085248
	Phase 5 Install Sustainable Energy Generation Solutions	Air Source Heat Pump		(Shibata et al., 2023)	162840	0.000455964
	Phase 5 Install Sustainable Energy Generation Solutions	PV (Solar Panels) small arrays some to generate electricity most to generate hot water		(EPD Norway, 2021)	42111.9	0.000152808
	Phase 5 Install Sustainable Energy Generation Solutions	SunAmp Cubes (Parks Road £340,000 Merifield £50,000 DWB £100,000) to replace Calorifiers	PCM with GSHP combination	(SunAmp, 2024)	78045.3	0.000218533
	Phase 5 Install Sustainable Energy Generation Solutions	Upgrade of Love Lane Transformer by SSE should it be required	NA	NA	0	0
	Phase 5 Install Sustainable Energy Generation Solutions	Landscaping due to ground source heat pump installing and changes to underground services	NA	NA	0	0
	Phase 5 Install Sustainable Energy Generation Solutions	Upgrading of services pipework (Electric, Water, Gas pipe and meter removal and changes to Sewerage system	NA	NA	0	0
	TOTAL				3.06775e+06	0.0168178
	Table 2: potential savings from Net Zero Activities, including sources. Savings are combined with baseline impacts for fuel and electricity consumption (Table 3)
	Phase of planned works	Planned work	Fuel, lower bound, %	Fuel, upper bound, %	Electricity, lower bound %	Electricity, Upper bound, %	Source
	Phase 1 Energy Monitoring	Heating Occupancy	0.11	0.34	0	0	[29]
	Phase 3 Improve Building Fabric	Windows replace glazing with Vacuum (Grade 2 Listed) & Secondary and Triple where appropriate.	0.056	0.153	0	0	[30]
		Designing and constructing/fitting Heritage Shutters	0	0	0	0	[30]
		Insulate Lofts	0.039	0.17	0	0	[30]
		Seal Air Gaps	0.02	0.13	0	0	[31]
		Window apertures /architraves (sealing/draught proofing)	Combined into one 'Windows' Retrofit
		Suspended Floors Spraying	0.088	0.25	0	0	[30]
		Adding internal Insulation on Cold External walls	0.132	0.68	0	0	[30]
		Cavity Wall Insulation	0.073	0.155	0	0	[30]
		External Doors (Glass)	Combined into one 'Windows' Retrofit
	Phase 4 Energy Reduction	Lagging of Heating pipes	0.03	0.04	0	0	[33]
		Lagging of Hot Water Pipes	0.03	0.04	0	0	[33]
		Replace Pumps	0	0	0.003	0.05	[34]
		Upgrading Fridges	0	0	0.0286	0.0286	[35]
		Upgrading Ovens	0	0	0.0027	0.0027	[35]
		Upgrading Hobs	0	0	0.0027	0.0027	[35]
		Upgrading Washing Machine	0	0	0.0021	0.0021	[35]
		Upgrade HVAC units	Unable to find a source
		LED Bulb & Fitting Replacement	0	0	0.015	0.04	[36]
		Lighting Occupancy	0	0	0.0025	0.045	[33]
		Electric Boilers	0.25	0.25	Table 3: efficiency of sustainable generation solutions		[40]
	Phase 5 Install Sustainable Energy Generation Solutions	Ground Source Heat Pumps	0.3	0.3	Table 3: efficiency of sustainable generation solutions		[38]
		PV (Solar Panels) small arrays	0	0	0.041	0.08	[39]
		Air Source Heat Pumps	0.45	0.45	Table 3: efficiency of sustainable generation solutions		[38]
		Upgrade of Transformer	0	0	0.0052	0.0052	[35]
	Table 3: Efficiency of sustainable energy generation solutions
	Name	Coefficient of Performance	Conversion from NG to Electricity KwH	Source
	Electric boiler	99% efficient boiler, replacing a 75% efficient 20-year-old boiler.	0.757576	[40]
	GSHP	3.07	0.325733	[38]
	ASHP	2.71	0.369004	[38]

## Sheet: 4b. Impacts- detailed
Table 1: Embodied impacts of Net Zero activities, including sources of environmental pressures.
Planned work			Mid-point environmental impact					Embodied biodiversity impact					Embodied carbon impact			Total embodied Biodiversity and Carbon Impacts								Assumptions
Phase of planned works	Reference Planned work	Further Detail	Data Source	Activity Name	Activity value	Activity Unit	Functional Unit	RECIPE end point characterisation factor	RECIPE characterisation factor unit	End point impact value	End point Unit	Functional Unit	End point impact value	End point Unit	End point functional unit	Required functional unit	characterisation factor into equivalent functional unit	Number of functional units required	Total Carbon impacts	Unit	Total biodiversity impacts per activity	sum of units	Unit
Phase 1 Energy Monitoring	Installing meters to measure Heat and Electric at point of use (Per Staircase)	NA	NA	Global Warming - Freshwater ecosystems	0	kg CO2e/FU	Per Staircase	7.65e-14	NA	0	species.year/FU	Per Staircase	0	kg CO2e/FU	Per Staircase	Per Staircase	1	57	0	kg CO2e	0	0	species.year
Phase 1 Energy Monitoring	Heating Occupancy (EyeSeaGreen)	NA	NA	Global Warming - Freshwater ecosystems	0	kg CO2e/FU	per room	7.65e-14	NA	0	species.year/FU	per room	0	kg CO2e/FU	per room	per room	1	1005.72	0	kg CO2e	0	0	species.year
Phase 2 Surveys	Electric Metering Survey	NA	NA	Global Warming - Freshwater ecosystems	0	kg CO2e/FU	per SC	7.65e-14	NA	0	species.year/FU	per SC	0	kg CO2e/FU	per SC	per SC	1	20	0	kg CO2e	0	0	species.year
Phase 2 Surveys	Loft Surveys	NA	NA	Global Warming - Freshwater ecosystems	0	kg CO2e/FU	per SC	7.65e-14	NA	0	species.year/FU	per SC	0	kg CO2e/FU	per SC	per SC	1	20	0	kg CO2e	0	0	species.year
Phase 2 Surveys	Window Surveys	NA	NA	Global Warming - Freshwater ecosystems	0	kg CO2e/FU	Per room	7.65e-14	NA	0	species.year/FU	Per room	0	kg CO2e/FU	Per room	Per room	1	723	0	kg CO2e	0	0	species.year
Phase 2 Surveys	Building fabric	NA	NA	Global Warming - Freshwater ecosystems	0	kg CO2e/FU	Hr per room	7.65e-14	NA	0	species.year/FU	Hr per room	0	kg CO2e/FU	Hr per room	Hr per room	1	599.146	0	kg CO2e	0	0	species.year
Phase 2 Surveys	Pipes	NA	NA	Global Warming - Freshwater ecosystems	0	kg CO2e/FU	Hr per room	7.65e-14	NA	0	species.year/FU	Hr per room	0	kg CO2e/FU	Hr per room	Hr per room	1	723	0	kg CO2e	0	0	species.year
Phase 2 Surveys	Pumps	NA	NA	Global Warming - Freshwater ecosystems	0	kg CO2e/FU	plant room	7.65e-14	NA	0	species.year/FU	plant room	0	kg CO2e/FU	plant room	plant room	1	723	0	kg CO2e	0	0	species.year
Phase 3 Improve Building Fabric	Windows replace glazing with Vacuum (Grade 2 Listed) & Secondary and Triple where appropriate.	Solar Gard Low-E film (like Quattro Coating) ECOLUX 70	[6]	Global Warming - Freshwater ecosystems	6.06553	kg CO2e/FU	m2	7.65e-14	species.year/kg CO2e	4.64013e-13	species.year/FU	m2	6.06553	kg CO2e/FU	m2	Per Window	0.984711	625	3733	kg CO2e	2.85574e-10	1.98571e-05	species.year
Phase 3 Improve Building Fabric	Windows replace glazing with Vacuum (Grade 2 Listed) & Secondary and Triple where appropriate.	Solar Gard Low-E film (like Quattro Coating) ECOLUX 70	[6]	Global Warming - Terrestrial ecosystems	6.06553	kg CO2e/FU	m2	2.8e-09	species.year/kg CO2e	1.69835e-08	species.year/FU	m2	/	kg CO2e/FU	m2	Per Window	0.984711	625	/	kg CO2e	1.04524e-05		species.year
Phase 3 Improve Building Fabric	Windows replace glazing with Vacuum (Grade 2 Listed) & Secondary and Triple where appropriate.	Solar Gard Low-E film (like Quattro Coating) ECOLUX 70	[6]	Acidification- terrestrial ecosystems	0.0825639	kg SO2 eq/FU	m2	7.65e-14	species.year/kg SO2 eq	6.31614e-15	species.year/FU	m2			m2	Per Window	0.984711	625	0	kg CO2e	3.88723e-12		species.year
Phase 3 Improve Building Fabric	Windows replace glazing with Vacuum (Grade 2 Listed) & Secondary and Triple where appropriate.	Solar Gard Low-E film (like Quattro Coating) ECOLUX 70	[6]	Freshwater Eutrophication	0.0192989	Kg P eq/FU	m2	6.71e-07	species.year/kg P eq	1.29495e-08	species.year/FU	m2			m2	Per Window	0.984711	625	0	kg CO2e	7.96972e-06		species.year
Phase 3 Improve Building Fabric	Windows replace glazing with Vacuum (Grade 2 Listed) & Secondary and Triple where appropriate.	Solar Gard Low-E film (like Quattro Coating) ECOLUX 70	[6]	Marine Eutrophication	0.0223605	kg N eq/FU	m2	1.7e-09	species.year/kg N eq	3.80128e-11	species.year/FU	m2			m2	Per Window	0.984711	625	0	kg CO2e	2.33947e-08		species.year
Phase 3 Improve Building Fabric	Windows replace glazing with Vacuum (Grade 2 Listed) & Secondary and Triple where appropriate.	Solar Gard Low-E film (like Quattro Coating) ECOLUX 70	[6]	Photochemical ozone formation - Terrestrial ecosystems	0.0177691	kg Nox eq/FU	m2	1.29e-07	species.year/kg NOx	2.29222e-09	species.year/FU	m2			m2	Per Window	0.984711	625	0	kg CO2e	1.41073e-06		species.year
Phase 3 Improve Building Fabric	Windows replace glazing with Vacuum (Grade 2 Listed) & Secondary and Triple where appropriate.	Solar Gard Low-E film (like Quattro Coating) ECOLUX 70	[6]	Water consumption	1.57759	m3/FU	m2	6.04e-13	species.year/m3	9.52865e-13	species.year/FU	m2			m2	Per Window	0.984711	625	0	kg CO2e	5.86435e-10		species.year
Phase 3 Improve Building Fabric	Windows replace glazing with Vacuum (Grade 2 Listed) & Secondary and Triple where appropriate.	Double glazing- aluminium	[7]	Global Warming - Terrestrial ecosystems	222.11	kg CO2e/FU	m2	2.8e-09	species.year/kg CO2e	6.21908e-07	species.year/FU	m2	/	kg CO2e/FU	m2	Per Window	0.984711	625	/	kg CO2e	0.00038275		species.year	assuming all windows replaced
Phase 3 Improve Building Fabric	Windows replace glazing with Vacuum (Grade 2 Listed) & Secondary and Triple where appropriate.	Double glazing- aluminium	[7]	Acidification- terrestrial ecosystems	1.007	kg SO2 eq/FU	m2	2.12e-07	species.year/kg SO2 eq	2.13484e-07	species.year/FU	m2			m2	Per Window	0.984711	625	0	kg CO2e	0.000131387		species.year	assuming all windows replaced
Phase 3 Improve Building Fabric	Windows replace glazing with Vacuum (Grade 2 Listed) & Secondary and Triple where appropriate.	Double glazing- aluminium	[7]	Freshwater Eutrophication	0.04323	Kg P eq/FU	m2	6.71e-07	species.year/kg P eq	2.90073e-08	species.year/FU	m2			m2	Per Window	0.984711	625	0	kg CO2e	1.78524e-05		species.year	assuming all windows replaced
Phase 3 Improve Building Fabric	Windows replace glazing with Vacuum (Grade 2 Listed) & Secondary and Triple where appropriate.	Double glazing- aluminium	[7]	Global Warming - Freshwater ecosystems	222.11	kg CO2e/FU	m2	7.65e-14	species.year/kg CO2e	1.69914e-11	species.year/FU	m2	222.11	kg CO2e/FU	m2	Per Window	0.984711	625	136696	kg CO2e	1.04573e-08	0.000532	species.year	assuming all windows replaced
Phase 3 Improve Building Fabric	Windows replace glazing with Vacuum (Grade 2 Listed) & Secondary and Triple where appropriate.	Double glazing- wood	[7]	Global Warming - Terrestrial ecosystems	52.42	kg CO2e/FU	m2	2.8e-09	species.year/kg CO2e	1.46776e-07	species.year/FU	m2	/	kg CO2e/FU	m2	Per Window	0.984711	625	/	kg CO2e	9.03324e-05		species.year	assuming all windows replaced
Phase 3 Improve Building Fabric	Windows replace glazing with Vacuum (Grade 2 Listed) & Secondary and Triple where appropriate.	Double glazing- wood	[7]	Acidification- terrestrial ecosystems	0.263	kg SO2 eq/FU	m2	2.12e-07	species.year/kg SO2 eq	5.5756e-08	species.year/FU	m2			m2	Per Window	0.984711	625	0	kg CO2e	3.43147e-05		species.year	assuming all windows replaced
Phase 3 Improve Building Fabric	Windows replace glazing with Vacuum (Grade 2 Listed) & Secondary and Triple where appropriate.	Double glazing- wood	[7]	Freshwater Eutrophication	0.02706	Kg P eq/FU	m2	6.71e-07	species.year/kg P eq	1.81573e-08	species.year/FU	m2			m2	Per Window	0.984711	625	0	kg CO2e	1.11748e-05		species.year	assuming all windows replaced
Phase 3 Improve Building Fabric	Windows replace glazing with Vacuum (Grade 2 Listed) & Secondary and Triple where appropriate.	Double glazing- wood	[7]	Global Warming - Freshwater ecosystems	52.42	kg CO2e/FU	m2	7.65e-14	species.year/kg CO2e	4.01013e-12	species.year/FU	m2	52.42	kg CO2e/FU	m2	Per Window	0.984711	625	32261.6	kg CO2e	2.46801e-09	0.000135824	species.year	assuming all windows replaced
Phase 3 Improve Building Fabric	Windows replace glazing with Vacuum (Grade 2 Listed) & Secondary and Triple where appropriate.	Triple glazing- aluminium	[7]	Global Warming - Terrestrial ecosystems	234.06	kg CO2e/FU	m2	2.8e-09	species.year/kg CO2e	6.55368e-07	species.year/FU	m2	/	kg CO2e/FU	m2	Per Window	0.984711	625	/	kg CO2e	0.000403342		species.year	assuming all windows replaced
Phase 3 Improve Building Fabric	Windows replace glazing with Vacuum (Grade 2 Listed) & Secondary and Triple where appropriate.	Triple glazing- aluminium	[7]	Acidification- terrestrial ecosystems	1.12	kg SO2 eq/FU	m2	2.12e-07	species.year/kg SO2 eq	2.3744e-07	species.year/FU	m2			m2	Per Window	0.984711	625	0	kg CO2e	0.000146131		species.year	assuming all windows replaced
Phase 3 Improve Building Fabric	Windows replace glazing with Vacuum (Grade 2 Listed) & Secondary and Triple where appropriate.	Triple glazing- aluminium	[7]	Freshwater Eutrophication	0.08382	Kg P eq/FU	m2	6.71e-07	species.year/kg P eq	5.62432e-08	species.year/FU	m2			m2	Per Window	0.984711	625	0	kg CO2e	3.46146e-05		species.year	assuming all windows replaced
Phase 3 Improve Building Fabric	Windows replace glazing with Vacuum (Grade 2 Listed) & Secondary and Triple where appropriate.	Triple glazing- aluminium	[7]	Global Warming - Freshwater ecosystems	234.06	kg CO2e/FU	m2	7.65e-14	species.year/kg CO2e	1.79056e-11	species.year/FU	m2	234.06	kg CO2e/FU	m2	Per Window	0.984711	625	144051	kg CO2e	1.10199e-08	0.000584099	species.year	assuming all windows replaced
Phase 3 Improve Building Fabric	Windows replace glazing with Vacuum (Grade 2 Listed) & Secondary and Triple where appropriate.	Triple glazing- wood	[7]	Global Warming - Terrestrial ecosystems	73.47	kg CO2e/FU	m2	2.8e-09	species.year/kg CO2e	2.05716e-07	species.year/FU	m2	/	kg CO2e/FU	m2	Per Window	0.984711	625	/	kg CO2e	0.000126607		species.year	assuming all windows replaced
Phase 3 Improve Building Fabric	Windows replace glazing with Vacuum (Grade 2 Listed) & Secondary and Triple where appropriate.	Triple glazing- wood	[7]	Acidification- terrestrial ecosystems	0.423	kg SO2 eq/FU	m2	2.12e-07	species.year/kg SO2 eq	8.9676e-08	species.year/FU	m2			m2	Per Window	0.984711	625	0	kg CO2e	5.51906e-05		species.year	assuming all windows replaced
Phase 3 Improve Building Fabric	Windows replace glazing with Vacuum (Grade 2 Listed) & Secondary and Triple where appropriate.	Triple glazing- wood	[7]	Freshwater Eutrophication	0.06237	Kg P eq/FU	m2	6.71e-07	species.year/kg P eq	4.18503e-08	species.year/FU	m2			m2	Per Window	0.984711	625	0	kg CO2e	2.57565e-05		species.year	assuming all windows replaced
Phase 3 Improve Building Fabric	Windows replace glazing with Vacuum (Grade 2 Listed) & Secondary and Triple where appropriate.	Triple glazing- wood	[7]	Global Warming - Freshwater ecosystems	73.47	kg CO2e/FU	m2	7.65e-14	species.year/kg CO2e	5.62046e-12	species.year/FU	m2	73.47	kg CO2e/FU	m2	Per Window	0.984711	625	45216.7	kg CO2e	3.45908e-09	0.000207557	species.year	assuming all windows replaced
Phase 3 Improve Building Fabric	Designing and constructing/fitting Heritage Shutters HMR & Front Quad	Solar Shading Devices- Venetian blinds	[8]	Global Warming - Freshwater ecosystems	361.598	kg CO2e/FU	m2	7.65e-14	species.year/kg CO2e	2.76622e-11	species.year/FU	m2	361.598	kg CO2e/FU	m2	per Window	0.984711	491	174830	kg CO2e	1.33745e-08		species.year	Venetian blinds may not be a good alternative to heritage shutters
Phase 3 Improve Building Fabric	Designing and constructing/fitting Heritage Shutters HMR & Front Quad	Solar Shading Devices- Venetian blinds	[8]	Global Warming - Terrestrial ecosystems	359.998	kg CO2e/FU	m2	2.8e-09	species.year/kg CO2e	1.00799e-06	species.year/FU	m2	/	kg CO2e/FU	m2	per Window	0.984711	491	/	kg CO2e	0.000487358		species.year	Venetian blinds may not be a good alternative to heritage shutters
Phase 3 Improve Building Fabric	Designing and constructing/fitting Heritage Shutters HMR & Front Quad	Solar Shading Devices- Venetian blinds	[8]	Acidification- terrestrial ecosystems	1.30391	kg SO2 eq/FU	m2	2.12e-07	species.year/kg SO2 eq	2.7643e-07	species.year/FU	m2			m2	per Window	0.984711	491	0	kg CO2e	0.000133652		species.year	Venetian blinds may not be a good alternative to heritage shutters
Phase 3 Improve Building Fabric	Designing and constructing/fitting Heritage Shutters HMR & Front Quad	Solar Shading Devices- Venetian blinds	[8]	Marine Eutrophication	0.0362033	Kg P eq/FU	m2	6.71e-07	species.year/kg P eq	2.42924e-08	species.year/FU	m2			m2	per Window	0.984711	491	0	kg CO2e	1.17452e-05	0.000632768	species.year	Venetian blinds may not be a good alternative to heritage shutters
Phase 3 Improve Building Fabric	Insulate Lofts	Mineral Wool insulation	[9]	Global Warming - Terrestrial ecosystems	15.52	kg CO2e/FU	m2	2.8e-09	species.year/kg CO2e	4.3456e-08	species.year/FU	m2	/	kg CO2e/FU	m2	m2	1	4900	/	kg CO2e	0.000212934		species.year	Assumes all loft insulation is mineral wool
Phase 3 Improve Building Fabric	Insulate Lofts	Mineral Wool insulation	[9]	Photochemical ozone formation - Terrestrial ecosystems	0.01508	kg Nox eq/FU	m2	1.29e-07	species.year/kg NOx	1.94532e-09	species.year/FU	m2			m2	m2	1	4900	0	kg CO2e	9.53207e-06		species.year	Assumes all loft insulation is mineral wool
Phase 3 Improve Building Fabric	Insulate Lofts	Mineral Wool insulation	[9]	Acidification- terrestrial ecosystems	0.1918	kg SO2 eq/FU	m2	2.12e-07	species.year/kg SO2 eq	4.06616e-08	species.year/FU	m2			m2	m2	1	4900	0	kg CO2e	0.000199242		species.year	Assumes all loft insulation is mineral wool
Phase 3 Improve Building Fabric	Insulate Lofts	Mineral Wool insulation	[9]	Freshwater Eutrophication	0.0055	Kg P eq/FU	m2	6.71e-07	species.year/kg P eq	3.6905e-09	species.year/FU	m2			m2	m2	1	4900	0	kg CO2e	1.80835e-05		species.year	Assumes all loft insulation is mineral wool
Phase 3 Improve Building Fabric	Insulate Lofts	Mineral Wool insulation	[9]	Marine Eutrophication	0.015	kg N eq/FU	m2	1.7e-09	species.year/kg N eq	2.55e-11	species.year/FU	m2			m2	m2	1	4900	0	kg CO2e	1.2495e-07		species.year	Assumes all loft insulation is mineral wool
Phase 3 Improve Building Fabric	Insulate Lofts	Mineral Wool insulation	[9]	Freshwater Ecotoxicity	0.0138007	kg 1-4 DCB eq/FU	m2	6.95e-10	species.year/kg 1-4 DCB eq	9.59148e-12	species.year/FU	m2			m2	m2	1	4900	0	kg CO2e	4.69982e-08		species.year	Assumes all loft insulation is mineral wool
Phase 3 Improve Building Fabric	Insulate Lofts	Mineral Wool insulation	[9]	Water consumption	0.023	m3/FU	m2	6.04e-13	species.year/m3	1.3892e-14	species.year/FU	m2			m2	m2	1	4900	0	kg CO2e	6.80708e-11		species.year	Assumes all loft insulation is mineral wool
Phase 3 Improve Building Fabric	Insulate Lofts	Mineral Wool insulation	[9]	Global Warming - Freshwater ecosystems	15.52	kg CO2e/FU	m2	7.65e-14	species.year/kg CO2e	1.18728e-12	species.year/FU	m2	15.52	kg CO2e/FU	m2	m2	1	4900	76048	kg CO2e	5.81767e-09	0.00043997	species.year	Assumes all loft insulation is mineral wool
Phase 3 Improve Building Fabric	Seal Air Gaps	Top Gun Sealant (1414X) Europe	[10]	Global Warming - Terrestrial ecosystems	1.7	kg CO2e/FU	kg	2.8e-09	species.year/kg CO2e	4.76e-09	species.year/FU	kg	/	kg CO2e/FU	kg	per room	0.0328059	723	/	kg CO2e	1.12901e-07		species.year
Phase 3 Improve Building Fabric	Seal Air Gaps	Top Gun Sealant (1414X) Europe	[10]	Acidification- terrestrial ecosystems	0.00911	kg SO2 eq/FU	kg	2.12e-07	species.year/kg SO2 eq	1.93132e-09	species.year/FU	kg			kg	per room	0.0328059	723	0	kg CO2e	4.58083e-08		species.year
Phase 3 Improve Building Fabric	Seal Air Gaps	Top Gun Sealant (1414X) Europe	[10]	Freshwater Eutrophication	0.0008217	Kg P eq/FU	kg	6.71e-07	species.year/kg N eq	5.51361e-10	species.year/FU	kg			kg	per room	0.0328059	723	0	kg CO2e	1.30775e-08		species.year
Phase 3 Improve Building Fabric	Seal Air Gaps	Top Gun Sealant (1414X) Europe	[10]	Global Warming - Freshwater ecosystems	1.7	kg CO2e/FU	kg	7.65e-14	species.year/kg CO2e	1.3005e-13	species.year/FU	kg	1.7	kg CO2e/FU	kg	per room	0.0328059	723	40.3217	kg CO2e	3.08461e-12	1.7179e-07	species.year
Phase 3 Improve Building Fabric	Window apertures/architraves (sealing/draught proofing)	Silicone based products type 1 (Quattro sealant alternative)	[11]	Global Warming - Freshwater ecosystems	6.37738	kg CO2e/FU	kg	7.65e-14	species.year/kg CO2e	4.87869e-13	species.year/FU	kg	6.37738	kg CO2e/FU	kg	per Window	10.7674	723	49646.9	kg CO2e	3.79799e-09	0.000146114	species.year	should be a better estimate for cost and number of windows available through quattro seal
Phase 3 Improve Building Fabric	Window apertures/architraves (sealing/draught proofing)	Silicone based products type 1 (Quattro sealant alternative)	[11]	Global Warming - Terrestrial ecosystems	6.37738	kg CO2e/FU	kg	2.8e-09	species.year/kg CO2e	1.78567e-08	species.year/FU	kg	/	kg CO2e/FU	kg	per Window	10.7674	723	/	kg CO2e	0.000139011		species.year	should be a better estimate for cost and number of windows available through quattro seal
Phase 3 Improve Building Fabric	Window apertures/architraves (sealing/draught proofing)	Silicone based products type 1 (Quattro sealant alternative)	[11]	Acidification- terrestrial ecosystems	0.0222363	kg SO2 eq/FU	kg	7.65e-14	species.year/kg CO2e	1.70108e-15	species.year/FU	kg			kg	per Window	10.7674	723	0	kg CO2e	1.32426e-11		species.year	should be a better estimate for cost and number of windows available through quattro seal
Phase 3 Improve Building Fabric	Window apertures/architraves (sealing/draught proofing)	Silicone based products type 1 (Quattro sealant alternative)	[11]	Freshwater Eutrophication	8.97957e-06	Kg P eq/FU	kg	6.71e-07	species.year/kg CO2e	6.02529e-12	species.year/FU	kg			kg	per Window	10.7674	723	0	kg CO2e	4.69059e-08		species.year	should be a better estimate for cost and number of windows available through quattro seal
Phase 3 Improve Building Fabric	Window apertures/architraves (sealing/draught proofing)	Silicone based products type 1 (Quattro sealant alternative)	[11]	Marine Eutrophication	0.00373123	kg N eq/FU	kg	1.7e-09	species.year/kg CO2e	6.34309e-12	species.year/FU	kg			kg	per Window	10.7674	723	0	kg CO2e	4.938e-08		species.year	should be a better estimate for cost and number of windows available through quattro seal
Phase 3 Improve Building Fabric	Window apertures/architraves (sealing/draught proofing)	Silicone based products type 1 (Quattro sealant alternative)	[11]	Photochemical ozone formation - Terrestrial ecosystems	0.00696458	kg Nox eq/FU	kg	1.29e-07	species.year/kg CO2e	8.98431e-10	species.year/FU	kg			kg	per Window	10.7674	723	0	kg CO2e	6.99415e-06		species.year	should be a better estimate for cost and number of windows available through quattro seal
Phase 3 Improve Building Fabric	Window apertures/architraves (sealing/draught proofing)	Silicone based products type 1 (Quattro sealant alternative)	[11]	water consumption	1.84334	m3/FU	kg	6.04e-13	species.year/kg CO2e	1.11338e-12	species.year/FU	kg			kg	per Window	10.7674	723	0	kg CO2e	8.66748e-09		species.year	should be a better estimate for cost and number of windows available through quattro seal
Phase 3 Improve Building Fabric	Window apertures/architraves (sealing/draught proofing)	Silicone based products type 2 (Quattro sealant alternative)	[11]	Global Warming - Freshwater ecosystems	7.41907	kg CO2e/FU	kg	7.65e-14	species.year/kg CO2e	5.67559e-13	species.year/FU	kg	7.41907	kg CO2e/FU	kg	per Window	10.7674	723	57756.3	kg CO2e	4.41836e-09	0.00017609	species.year	should be a better estimate for cost and number of windows available through quattro seal
Phase 3 Improve Building Fabric	Window apertures/architraves (sealing/draught proofing)	Silicone based products type 2 (Quattro sealant alternative)	[11]	Global Warming - Terrestrial ecosystems	7.41907	kg CO2e/FU	kg	2.8e-09	species.year/kg CO2e	2.07734e-08	species.year/FU	kg	/	kg CO2e/FU	kg	per Window	10.7674	723	/	kg CO2e	0.000161718		species.year	should be a better estimate for cost and number of windows available through quattro seal
Phase 3 Improve Building Fabric	Window apertures/architraves (sealing/draught proofing)	Silicone based products type 2 (Quattro sealant alternative)	[11]	Acidification- terrestrial ecosystems	0.0409125	kg SO2 eq/FU	kg	7.65e-14	species.year/kg CO2e	3.12981e-15	species.year/FU	kg			kg	per Window	10.7674	723	0	kg CO2e	2.4365e-11		species.year	should be a better estimate for cost and number of windows available through quattro seal
Phase 3 Improve Building Fabric	Window apertures/architraves (sealing/draught proofing)	Silicone based products type 2 (Quattro sealant alternative)	[11]	Freshwater Eutrophication	1.12575e-05	Kg P eq/FU	kg	6.71e-07	species.year/kg CO2e	7.55379e-12	species.year/FU	kg			kg	per Window	10.7674	723	0	kg CO2e	5.88051e-08		species.year	should be a better estimate for cost and number of windows available through quattro seal
Phase 3 Improve Building Fabric	Window apertures/architraves (sealing/draught proofing)	Silicone based products type 2 (Quattro sealant alternative)	[11]	Marine Eutrophication	0.0049004	kg N eq/FU	kg	1.7e-09	species.year/kg CO2e	8.33068e-12	species.year/FU	kg			kg	per Window	10.7674	723	0	kg CO2e	6.4853e-08		species.year	should be a better estimate for cost and number of windows available through quattro seal
Phase 3 Improve Building Fabric	Window apertures/architraves (sealing/draught proofing)	Silicone based products type 2 (Quattro sealant alternative)	[11]	Photochemical ozone formation - Terrestrial ecosystems	0.0141723	kg Nox eq/FU	kg	1.29e-07	species.year/kg CO2e	1.82823e-09	species.year/FU	kg			kg	per Window	10.7674	723	0	kg CO2e	1.42325e-05		species.year	should be a better estimate for cost and number of windows available through quattro seal
Phase 3 Improve Building Fabric	Window apertures/architraves (sealing/draught proofing)	Silicone based products type 2 (Quattro sealant alternative)	[11]	water consumption	2.41664	m3/FU	kg	6.04e-13	species.year/kg CO2e	1.45965e-12	species.year/FU	kg			kg	per Window	10.7674	723	0	kg CO2e	1.13632e-08		species.year	should be a better estimate for cost and number of windows available through quattro seal
Phase 3 Improve Building Fabric	Window apertures/architraves (sealing/draught proofing)	Silicone based products type 3 (Quattro sealant alternative)	[11]	Global Warming - Freshwater ecosystems	8.45613	kg CO2e/FU	kg	7.65e-14	species.year/kg CO2e	6.46894e-13	species.year/FU	kg	8.45613	kg CO2e/FU	kg	per Window	10.7674	723	65829.6	kg CO2e	5.03597e-09	0.000245136	species.year	should be a better estimate for cost and number of windows available through quattro seal
Phase 3 Improve Building Fabric	Window apertures/architraves (sealing/draught proofing)	Silicone based products type 3 (Quattro sealant alternative)	[11]	Global Warming - Terrestrial ecosystems	8.45613	kg CO2e/FU	kg	2.8e-09	species.year/kg CO2e	2.36772e-08	species.year/FU	kg	/	kg CO2e/FU	kg	per Window	10.7674	723	/	kg CO2e	0.000184323		species.year	should be a better estimate for cost and number of windows available through quattro seal
Phase 3 Improve Building Fabric	Window apertures/architraves (sealing/draught proofing)	Silicone based products type 3 (Quattro sealant alternative)	[11]	Acidification- terrestrial ecosystems	0.0316121	kg SO2 eq/FU	kg	7.65e-14	species.year/kg CO2e	2.41833e-15	species.year/FU	kg			kg	per Window	10.7674	723	0	kg CO2e	1.88263e-11		species.year	should be a better estimate for cost and number of windows available through quattro seal
Phase 3 Improve Building Fabric	Window apertures/architraves (sealing/draught proofing)	Silicone based products type 3 (Quattro sealant alternative)	[11]	Freshwater Eutrophication	1.1805e-05	Kg P eq/FU	kg	6.71e-07	species.year/kg CO2e	7.92116e-12	species.year/FU	kg			kg	per Window	10.7674	723	0	kg CO2e	6.1665e-08		species.year	should be a better estimate for cost and number of windows available through quattro seal
Phase 3 Improve Building Fabric	Window apertures/architraves (sealing/draught proofing)	Silicone based products type 3 (Quattro sealant alternative)	[11]	Marine Eutrophication	0.00482284	kg N eq/FU	kg	1.7e-09	species.year/kg CO2e	8.19883e-12	species.year/FU	kg			kg	per Window	10.7674	723	0	kg CO2e	6.38266e-08		species.year	should be a better estimate for cost and number of windows available through quattro seal
Phase 3 Improve Building Fabric	Window apertures/architraves (sealing/draught proofing)	Silicone based products type 3 (Quattro sealant alternative)	[11]	Photochemical ozone formation - Terrestrial ecosystems	0.0604171	kg Nox eq/FU	kg	1.29e-07	species.year/kg NOx	7.79381e-09	species.year/FU	kg			kg	per Window	10.7674	723	0	kg CO2e	6.06735e-05		species.year	should be a better estimate for cost and number of windows available through quattro seal
Phase 3 Improve Building Fabric	Window apertures/architraves (sealing/draught proofing)	Silicone based products type 3 (Quattro sealant alternative)	[11]	water consumption	1.96224	m3/FU	kg	6.04e-13	species.year/m3	1.18519e-12	species.year/FU	kg			kg	per Window	10.7674	723	0	kg CO2e	9.22653e-09		species.year	should be a better estimate for cost and number of windows available through quattro seal
Phase 3 Improve Building Fabric	Suspended Floors Spraying (Q Bot)	Elastospray LCA- closed cell	[12]	Global Warming - Terrestrial ecosystems	17.5061	kg CO2e/FU	m2	2.8e-09	species.year/kg CO2e	4.90171e-08	species.year/FU	m2	/	kg CO2e/FU	m2	m2	1	740	/	kg CO2e	3.62727e-05		species.year
Phase 3 Improve Building Fabric	Suspended Floors Spraying (Q Bot)	Elastospray LCA- closed cell	[12]	Acidification- terrestrial ecosystems	0.0141333	kg SO2 eq/FU	m2	2.12e-07	species.year/kg SO2 eq	2.99625e-09	species.year/FU	m2			m2	m2	1	740	0	kg CO2e	2.21723e-06		species.year
Phase 3 Improve Building Fabric	Suspended Floors Spraying (Q Bot)	Elastospray LCA- closed cell	[12]	Marine Eutrophication	0.00107033	kg N eq/FU	m2	1.7e-09	species.year/kg N eq	1.81956e-12	species.year/FU	m2			m2	m2	1	740	0	kg CO2e	1.34648e-09		species.year
Phase 3 Improve Building Fabric	Suspended Floors Spraying (Q Bot)	Elastospray LCA- closed cell	[12]	Global Warming - Freshwater ecosystems	17.5061	kg CO2e/FU	m2	7.65e-14	species.year/kg CO2e	1.33922e-12	species.year/FU	m2	17.5061	kg CO2e/FU	m2	m2	1	740	12954.5	kg CO2e	9.91022e-10	3.84923e-05	species.year
Phase 3 Improve Building Fabric	Insulate Cold Bridges	NA	NA	NA	NA	NA	NA	NA	NA	#VALUE!	NA	NA	NA	NA	per room	per room	1	723	NA	kg CO2e	0		species.year	assuming cold bridges are solved during other insulation approaches
Phase 3 Improve Building Fabric	Adding internal Insulation on Cold External walls plus plastering and decoration	Phenolic Foam insulation	[9]	Global Warming - Terrestrial ecosystems	17.06	kg CO2e/FU	m2	2.8e-09	species.year/kg CO2e	4.7768e-08	species.year/FU	m2	/	kg CO2e/FU	m2	per room	11.6682	385	/	kg CO2e	0.000214586		species.year	Assuming all phenolic foam
Phase 3 Improve Building Fabric	Adding internal Insulation on Cold External walls plus plastering and decoration	Phenolic Foam insulation	[9]	Photochemical ozone formation - Terrestrial ecosystems	0.02465	kg Nox eq/FU	m2	1.29e-07	species.year/kg NOx	3.17985e-09	species.year/FU	m2			m2	per room	11.6682	385	0	kg CO2e	1.42847e-05		species.year	Assuming all phenolic foam
Phase 3 Improve Building Fabric	Adding internal Insulation on Cold External walls plus plastering and decoration	Phenolic Foam insulation	[9]	Acidification- terrestrial ecosystems	0.10412	kg SO2 eq/FU	m2	2.12e-07	species.year/kg SO2 eq	2.20734e-08	species.year/FU	m2			m2	per room	11.6682	385	0	kg CO2e	9.91593e-05		species.year	Assuming all phenolic foam
Phase 3 Improve Building Fabric	Adding internal Insulation on Cold External walls plus plastering and decoration	Phenolic Foam insulation	[9]	Freshwater Eutrophication	0.0047	Kg P eq/FU	m2	6.71e-07	species.year/kg P eq	3.1537e-09	species.year/FU	m2			m2	per room	11.6682	385	0	kg CO2e	1.41672e-05		species.year	Assuming all phenolic foam
Phase 3 Improve Building Fabric	Adding internal Insulation on Cold External walls plus plastering and decoration	Phenolic Foam insulation	[9]	Marine Eutrophication	0.011	kg N eq/FU	m2	1.7e-09	species.year/kg N eq	1.87e-11	species.year/FU	m2			m2	per room	11.6682	385	0	kg CO2e	8.4005e-08		species.year	Assuming all phenolic foam
Phase 3 Improve Building Fabric	Adding internal Insulation on Cold External walls plus plastering and decoration	Phenolic Foam insulation	[9]	Freshwater Ecotoxicity	0.0366466	kg 1-4 DCB eq/FU	m2	6.95e-10	species.year/kg 1-4 DCB eq	2.54694e-11	species.year/FU	m2			m2	per room	11.6682	385	0	kg CO2e	1.14415e-07		species.year	Assuming all phenolic foam
Phase 3 Improve Building Fabric	Adding internal Insulation on Cold External walls plus plastering and decoration	Phenolic Foam insulation	[9]	Water consumption	0.032	m3/FU	m2	6.04e-13	species.year/m3	1.9328e-14	species.year/FU	m2			m2	per room	11.6682	385	0	kg CO2e	8.68261e-11		species.year	Assuming all phenolic foam
Phase 3 Improve Building Fabric	Adding internal Insulation on Cold External walls plus plastering and decoration	Phenolic Foam insulation	[9]	Global Warming - Freshwater ecosystems	17.06	kg CO2e/FU	m2	7.65e-14	species.year/kg CO2e	1.30509e-12	species.year/FU	m2	17.06	kg CO2e/FU	m2	per room	11.6682	385	76637.7	kg CO2e	5.86279e-09	0.000342401	species.year	Assuming all phenolic foam
Phase 3 Improve Building Fabric	Adding internal Insulation on Cold External walls plus plastering and decoration	EPS insulation	[9]	Global Warming - Terrestrial ecosystems	14.38	kg CO2e/FU	m2	2.8e-09	species.year/kg CO2e	4.0264e-08	species.year/FU	m2	/	kg CO2e/FU	m2	per room	11.6682	385	/	kg CO2e	0.000180876		species.year	Assuming all EPS
Phase 3 Improve Building Fabric	Adding internal Insulation on Cold External walls plus plastering and decoration	EPS insulation	[9]	Photochemical ozone formation - Terrestrial ecosystems	0.02291	kg Nox eq/FU	m2	1.29e-07	species.year/kg NOx	2.95539e-09	species.year/FU	m2			m2	per room	11.6682	385	0	kg CO2e	1.32763e-05		species.year	Assuming all EPS
Phase 3 Improve Building Fabric	Adding internal Insulation on Cold External walls plus plastering and decoration	EPS insulation	[9]	Acidification- terrestrial ecosystems	0.0822	kg SO2 eq/FU	m2	2.12e-07	species.year/kg SO2 eq	1.74264e-08	species.year/FU	m2			m2	per room	11.6682	385	0	kg CO2e	7.82837e-05		species.year	Assuming all EPS
Phase 3 Improve Building Fabric	Adding internal Insulation on Cold External walls plus plastering and decoration	EPS insulation	[9]	Freshwater Eutrophication	0.0016	Kg P eq/FU	m2	6.71e-07	species.year/kg P eq	1.0736e-09	species.year/FU	m2			m2	per room	11.6682	385	0	kg CO2e	4.82288e-06		species.year	Assuming all EPS
Phase 3 Improve Building Fabric	Adding internal Insulation on Cold External walls plus plastering and decoration	EPS insulation	[9]	Marine Eutrophication	0.0087	kg N eq/FU	m2	1.7e-09	species.year/kg N eq	1.479e-11	species.year/FU	m2			m2	per room	11.6682	385	0	kg CO2e	6.64403e-08		species.year	Assuming all EPS
Phase 3 Improve Building Fabric	Adding internal Insulation on Cold External walls plus plastering and decoration	EPS insulation	[9]	Freshwater Ecotoxicity	0.017411	kg 1-4 DCB eq/FU	m2	6.95e-10	species.year/kg 1-4 DCB eq	1.21007e-11	species.year/FU	m2			m2	per room	11.6682	385	0	kg CO2e	5.43592e-08		species.year	Assuming all EPS
Phase 3 Improve Building Fabric	Adding internal Insulation on Cold External walls plus plastering and decoration	EPS insulation	[9]	Water consumption	0.0056	m3/FU	m2	6.04e-13	species.year/m3	3.3824e-15	species.year/FU	m2			m2	per room	11.6682	385	0	kg CO2e	1.51946e-11		species.year	Assuming all EPS
Phase 3 Improve Building Fabric	Adding internal Insulation on Cold External walls plus plastering and decoration	EPS insulation	[9]	Global Warming - Freshwater ecosystems	14.38	kg CO2e/FU	m2	7.65e-14	species.year/kg CO2e	1.10007e-12	species.year/FU	m2	14.38	kg CO2e/FU	m2	per room	11.6682	385	64598.5	kg CO2e	4.94179e-09	0.000277384	species.year	Assuming all EPS
Phase 3 Improve Building Fabric	Adding internal Insulation on Cold External walls plus plastering and decoration	Mineral Wool insulation	[9]	Global Warming - Terrestrial ecosystems	15.52	kg CO2e/FU	m2	2.8e-09	species.year/kg CO2e	4.3456e-08	species.year/FU	m2	/	kg CO2e/FU	m2	per room	11.6682	385	/	kg CO2e	0.000195215		species.year	Assuming all mineral wool
Phase 3 Improve Building Fabric	Adding internal Insulation on Cold External walls plus plastering and decoration	Mineral Wool insulation	[9]	Photochemical ozone formation - Terrestrial ecosystems	0.01508	kg Nox eq/FU	m2	1.29e-07	species.year/kg NOx	1.94532e-09	species.year/FU	m2			m2	per room	11.6682	385	0	kg CO2e	8.73886e-06		species.year	Assuming all mineral wool
Phase 3 Improve Building Fabric	Adding internal Insulation on Cold External walls plus plastering and decoration	Mineral Wool insulation	[9]	Acidification- terrestrial ecosystems	0.1918	kg SO2 eq/FU	m2	2.12e-07	species.year/kg SO2 eq	4.06616e-08	species.year/FU	m2			m2	per room	11.6682	385	0	kg CO2e	0.000182662		species.year	Assuming all mineral wool
Phase 3 Improve Building Fabric	Adding internal Insulation on Cold External walls plus plastering and decoration	Mineral Wool insulation	[9]	Freshwater Eutrophication	0.0055	Kg P eq/FU	m2	6.71e-07	species.year/kg P eq	3.6905e-09	species.year/FU	m2			m2	per room	11.6682	385	0	kg CO2e	1.65786e-05		species.year	Assuming all mineral wool
Phase 3 Improve Building Fabric	Adding internal Insulation on Cold External walls plus plastering and decoration	Mineral Wool insulation	[9]	Marine Eutrophication	0.015	kg N eq/FU	m2	1.7e-09	species.year/kg N eq	2.55e-11	species.year/FU	m2			m2	per room	11.6682	385	0	kg CO2e	1.14552e-07		species.year	Assuming all mineral wool
Phase 3 Improve Building Fabric	Adding internal Insulation on Cold External walls plus plastering and decoration	Mineral Wool insulation	[9]	Freshwater Ecotoxicity	0.0138007	kg 1-4 DCB eq/FU	m2	6.95e-10	species.year/kg 1-4 DCB eq	9.59148e-12	species.year/FU	m2			m2	per room	11.6682	385	0	kg CO2e	4.30873e-08		species.year	Assuming all mineral wool
Phase 3 Improve Building Fabric	Adding internal Insulation on Cold External walls plus plastering and decoration	Mineral Wool insulation	[9]	Water consumption	0.023	m3/FU	m2	1.35e-08	species.year/m3	3.105e-10	species.year/FU	m2			m2	per room	11.6682	385	0	kg CO2e	1.39484e-06		species.year	Assuming all mineral wool
Phase 3 Improve Building Fabric	Adding internal Insulation on Cold External walls plus plastering and decoration	Mineral Wool insulation	[9]	Global Warming - Freshwater ecosystems	15.52	kg CO2e/FU	m2	7.65e-14	species.year/kg CO2e	1.18728e-12	species.year/FU	m2	15.52	kg CO2e/FU	m2	per room	11.6682	385	69719.7	kg CO2e	5.33355e-09	0.000404752	species.year	Assuming all mineral wool
Phase 3 Improve Building Fabric	Cavity Wall Insulation	EPS insulation	[9]	Global Warming - Terrestrial ecosystems	14.38	kg CO2e/FU	m2	2.8e-09	species.year/kg CO2e	4.0264e-08	species.year/FU	m2	/	kg CO2e/FU	m2	per wall	11.6682	2100	/	kg CO2e	0.000986595		species.year	Assuming all EPS
Phase 3 Improve Building Fabric	Cavity Wall Insulation	EPS insulation	[9]	Photochemical ozone formation - Terrestrial ecosystems	0.02291	kg Nox eq/FU	m2	1.29e-07	species.year/kg NOx	2.95539e-09	species.year/FU	m2			m2	per wall	11.6682	2100	0	kg CO2e	7.24164e-05		species.year	Assuming all EPS
Phase 3 Improve Building Fabric	Cavity Wall Insulation	EPS insulation	[9]	Acidification- terrestrial ecosystems	0.0822	kg SO2 eq/FU	m2	2.12e-07	species.year/kg SO2 eq	1.74264e-08	species.year/FU	m2			m2	per wall	11.6682	2100	0	kg CO2e	0.000427002		species.year	Assuming all EPS
Phase 3 Improve Building Fabric	Cavity Wall Insulation	EPS insulation	[9]	Freshwater Eutrophication	0.0016	Kg P eq/FU	m2	6.71e-07	species.year/kg P eq	1.0736e-09	species.year/FU	m2			m2	per wall	11.6682	2100	0	kg CO2e	2.63066e-05		species.year	Assuming all EPS
Phase 3 Improve Building Fabric	Cavity Wall Insulation	EPS insulation	[9]	Marine Eutrophication	0.0087	kg N eq/FU	m2	1.7e-09	species.year/kg N eq	1.479e-11	species.year/FU	m2			m2	per wall	11.6682	2100	0	kg CO2e	3.62402e-07		species.year	Assuming all EPS
Phase 3 Improve Building Fabric	Cavity Wall Insulation	EPS insulation	[9]	Freshwater Ecotoxicity	0.017411	kg 1-4 DCB eq/FU	m2	6.95e-10	species.year/kg 1-4 DCB eq	1.21007e-11	species.year/FU	m2			m2	per wall	11.6682	2100	0	kg CO2e	2.96505e-07		species.year	Assuming all EPS
Phase 3 Improve Building Fabric	Cavity Wall Insulation	EPS insulation	[9]	Water consumption	0.0056	m3/FU	m2	6.04e-13	species.year/m3	3.3824e-15	species.year/FU	m2			m2	per wall	11.6682	2100	0	kg CO2e	8.28795e-11		species.year	Assuming all EPS
Phase 3 Improve Building Fabric	Cavity Wall Insulation	EPS insulation	[9]	Global Warming - Freshwater ecosystems	14.38	kg CO2e/FU	m2	7.65e-14	species.year/kg CO2e	1.10007e-12	species.year/FU	m2	14.38	kg CO2e/FU	m2	per wall	11.6682	2100	352355	kg CO2e	2.69552e-08	0.00151301	species.year	Assuming all EPS
Phase 3 Improve Building Fabric	Cavity Wall Insulation	Mineral Wool insulation	[9]	Global Warming - Terrestrial ecosystems	15.52	kg CO2e/FU	m2	2.8e-09	species.year/kg CO2e	4.3456e-08	species.year/FU	m2	/	kg CO2e/FU	m2	per wall	11.6682	2100	/	kg CO2e	0.00106481		species.year	Assuming all mineral wool
Phase 3 Improve Building Fabric	Cavity Wall Insulation	Mineral Wool insulation	[9]	Photochemical ozone formation - Terrestrial ecosystems	0.01508	kg Nox eq/FU	m2	1.29e-07	species.year/kg NOx	1.94532e-09	species.year/FU	m2			m2	per wall	11.6682	2100	0	kg CO2e	4.76665e-05		species.year	Assuming all mineral wool
Phase 3 Improve Building Fabric	Cavity Wall Insulation	Mineral Wool insulation	[9]	Acidification- terrestrial ecosystems	0.1918	kg SO2 eq/FU	m2	2.12e-07	species.year/kg SO2 eq	4.06616e-08	species.year/FU	m2			m2	per wall	11.6682	2100	0	kg CO2e	0.000996338		species.year	Assuming all mineral wool
Phase 3 Improve Building Fabric	Cavity Wall Insulation	Mineral Wool insulation	[9]	Freshwater Eutrophication	0.0055	Kg P eq/FU	m2	6.71e-07	species.year/kg P eq	3.6905e-09	species.year/FU	m2			m2	per wall	11.6682	2100	0	kg CO2e	9.04289e-05		species.year	Assuming all mineral wool
Phase 3 Improve Building Fabric	Cavity Wall Insulation	Mineral Wool insulation	[9]	Marine Eutrophication	0.015	kg N eq/FU	m2	1.7e-09	species.year/kg N eq	2.55e-11	species.year/FU	m2			m2	per wall	11.6682	2100	0	kg CO2e	6.24831e-07		species.year	Assuming all mineral wool
Phase 3 Improve Building Fabric	Cavity Wall Insulation	Mineral Wool insulation	[9]	Freshwater Ecotoxicity	0.0138007	kg 1-4 DCB eq/FU	m2	6.95e-10	species.year/kg 1-4 DCB eq	9.59148e-12	species.year/FU	m2			m2	per wall	11.6682	2100	0	kg CO2e	2.35022e-07		species.year	Assuming all mineral wool
Phase 3 Improve Building Fabric	Cavity Wall Insulation	Mineral Wool insulation	[9]	Water consumption	0.023	m3/FU	m2	1.35e-08	species.year/m3	3.105e-10	species.year/FU	m2			m2	per wall	11.6682	2100	0	kg CO2e	7.60823e-06		species.year	Assuming all mineral wool
Phase 3 Improve Building Fabric	Cavity Wall Insulation	Mineral Wool insulation	[9]	Global Warming - Freshwater ecosystems	15.52	kg CO2e/FU	m2	7.65e-14	species.year/kg CO2e	1.18728e-12	species.year/FU	m2	15.52	kg CO2e/FU	m2	per wall	11.6682	2100	380289	kg CO2e	2.90921e-08	0.00220774	species.year	Assuming all mineral wool
Phase 3 Improve Building Fabric	External Doors (Glass)	Technishield 70 40 MM Glazed door	[13]	Global Warming - Freshwater ecosystems	198.496	kg CO2e/FU	m2	7.65e-14	species.year/kg CO2e	1.51849e-11	species.year/FU	m2	198.496	kg CO2e/FU	m2	per door	1.94682	7	2705.05	kg CO2e	2.06936e-10	0.000917953	species.year
Phase 3 Improve Building Fabric	External Doors (Glass)	Technishield 70 40 MM Glazed door	[13]	Global Warming - Terrestrial ecosystems	198.496	kg CO2e/FU	m2	2.8e-09	species.year/kg CO2e	5.55788e-07	species.year/FU	m2	/	kg CO2e/FU	m2	per door	1.94682	7	/	kg CO2e	7.57413e-06		species.year
Phase 3 Improve Building Fabric	External Doors (Glass)	Technishield 70 40 MM Glazed door	[13]	Acidification- terrestrial ecosystems	0.885436	kg SO2 eq/FU	m2	2.12e-07	species.year/kg SO2 eq	1.87713e-07	species.year/FU	m2			m2	per door	1.94682	7	0	kg CO2e	2.5581e-06		species.year
Phase 3 Improve Building Fabric	External Doors (Glass)	Technishield 70 40 MM Glazed door	[13]	Freshwater Eutrophication	0.33	Kg P eq/FU	m2	6.71e-07	species.year/kg P eq	2.2143e-07	species.year/FU	m2			m2	per door	1.94682	7	0	kg CO2e	3.01759e-06		species.year
Phase 3 Improve Building Fabric	External Doors (Glass)	Technishield 70 40 MM Glazed door	[13]	Marine Eutrophication	0.103598	kg N eq/FU	m2	1.7e-09	species.year/kg N eq	1.76116e-10	species.year/FU	m2			m2	per door	1.94682	7	0	kg CO2e	2.40006e-09		species.year
Phase 3 Improve Building Fabric	External Doors (Glass)	Technishield 70 40 MM Glazed door	[13]	Photochemical ozone formation - Terrestrial ecosystems	0.132684	kg Nox eq/FU	m2	1.29e-07	species.year/kg Nox	1.71162e-08	species.year/FU	m2			m2	per door	1.94682	7	0	kg CO2e	2.33256e-07		species.year
Phase 3 Improve Building Fabric	External Doors (Glass)	Technishield 70 40 MM Glazed door	[13]	Water consumption	4916.81	m3/FU	m2	1.35e-08	species.year/m3	6.63769e-05	species.year/FU	m2			m2	per door	1.94682	7	0	kg CO2e	0.000904567		species.year
Phase 4 Energy Reduction	Lagging of Heating pipes	Lagging material	[14]	Global Warming - Terrestrial ecosystems	226.043	kg CO2e/FU	m3	2.8e-09	species.year/kg CO2e	6.32922e-07	species.year/FU	m3	/	kg CO2e/FU	m3	Per 5 meter	0.0065	4427.02	/	kg CO2e	1.82127e-05		species.year
Phase 4 Energy Reduction	Lagging of Heating pipes	Lagging material	[14]	Acidification- terrestrial ecosystems	1.32517	kg SO2 eq/FU	m3	2.12e-07	species.year/kg SO2 eq	2.80937e-07	species.year/FU	m3			m3	Per 5 meter	0.0065	4427.02	0	kg CO2e	8.08414e-06		species.year
Phase 4 Energy Reduction	Lagging of Heating pipes	Lagging material	[14]	Freshwater Eutrophication	0.12941	Kg P eq/FU	m3	6.71e-07	species.year/kg P eq	8.68344e-08	species.year/FU	m3			m3	Per 5 meter	0.0065	4427.02	0	kg CO2e	2.49872e-06		species.year
Phase 4 Energy Reduction	Lagging of Heating pipes	Lagging material	[14]	Global Warming - Freshwater ecosystems	226.043	kg CO2e/FU	m3	7.65e-14	species.year/kg CO2e	1.72923e-11	species.year/FU	m3	226.043	kg CO2e/FU	m3	Per 5 meter	0.0065	4427.02	6504.54	kg CO2e	4.97597e-10	2.87961e-05	species.year
Phase 4 Energy Reduction	Lagging of Hot Water Pipes	Lagging material	[14]	Global Warming - Terrestrial ecosystems	226.043	kg CO2e/FU	m3	2.8e-09	species.year/kg CO2e	6.32922e-07	species.year/FU	m3	/	kg CO2e/FU	m3	Per 5 meter	0.0065	4397.02	/	kg CO2e	1.80893e-05		species.year
Phase 4 Energy Reduction	Lagging of Hot Water Pipes	Lagging material	[14]	Acidification- terrestrial ecosystems	1.32517	kg SO2 eq/FU	m3	2.12e-07	species.year/kg SO2 eq	2.80937e-07	species.year/FU	m3			m3	Per 5 meter	0.0065	4397.02	0	kg CO2e	8.02935e-06		species.year
Phase 4 Energy Reduction	Lagging of Hot Water Pipes	Lagging material	[14]	Freshwater Eutrophication	0.12941	Kg P eq/FU	m3	6.71e-07	species.year/kg P eq	8.68344e-08	species.year/FU	m3			m3	Per 5 meter	0.0065	4397.02	0	kg CO2e	2.48178e-06		species.year
Phase 4 Energy Reduction	Lagging of Hot Water Pipes	Lagging material	[14]	Global Warming - Freshwater ecosystems	226.043	kg CO2e/FU	m3	7.65e-14	species.year/kg CO2e	1.72923e-11	species.year/FU	m3	226.043	kg CO2e/FU	m3	Per 5 meter	0.0065	4397.02	6460.46	kg CO2e	4.94225e-10	2.86009e-05	species.year
Phase 4 Energy Reduction	Replace Pumps	MAGNA3 25 Cast Iron Pump	[15]	Global Warming - Freshwater ecosystems	104.666	kg CO2e/FU	1 pump	7.65e-14	species.year/kg CO2e	8.00692e-12	species.year/FU	1 pump	104.666	kg CO2e/FU	1 pump	1 pump	1	60	6279.94	kg CO2e	4.80415e-10		species.year
Phase 4 Energy Reduction	Replace Pumps	MAGNA3 25 Cast Iron Pump	[15]	Global Warming - Terrestrial ecosystems	104.666	kg CO2e/FU	1 pump	2.8e-09	species.year/kg CO2e	2.93064e-07	species.year/FU	1 pump	/	kg CO2e/FU	1 pump	1 pump	1	60	/	kg CO2e	1.75838e-05		species.year
Phase 4 Energy Reduction	Replace Pumps	MAGNA3 25 Cast Iron Pump	[15]	Acidification- terrestrial ecosystems	0.608351	kg SO2 eq/FU	1 pump	2.12e-07	species.year/kg SO2 eq	1.2897e-07	species.year/FU	1 pump			1 pump	1 pump	1	60	0	kg CO2e	7.73822e-06		species.year
Phase 4 Energy Reduction	Replace Pumps	MAGNA3 25 Cast Iron Pump	[15]	Freshwater Eutrophication	0.0128721	Kg P eq/FU	1 pump	6.71e-07	species.year/kg P eq	8.63721e-09	species.year/FU	1 pump			1 pump	1 pump	1	60	0	kg CO2e	5.18233e-07	2.58408e-05	species.year
Phase 4 Energy Reduction	Hydrogen Ready/Electric Boilers	Electric boiler	[26]	Global Warming - Freshwater ecosystems	2386	kg CO2e/FU	1L hot water	7.65e-14	species.year/kg CO2e	1.82529e-10	species.year/FU	1L hot water	2386	kg CO2e/FU	1L hot water	per boiler	1	110	262460	kg CO2e	2.00782e-08	0.000734908	species.year
Phase 4 Energy Reduction	Hydrogen Ready/Electric Boilers	electric boiler	26]	Global Warming - Terrestrial ecosystems	2386	kg CO2e/FU	1L hot water	2.8e-09	species.year/kg CO2e	6.6808e-06	species.year/FU	1L hot water	/	kg CO2e/FU	1L hot water	per boiler	1	110	/	kg CO2e	0.000734888		species.year
Phase 4 Energy Reduction	Upgrading Fridges	Objet Collection refrigerator	[16]	Global Warming - Freshwater ecosystems	573.9	kg CO2e/FU	1 fridge	7.65e-14	species.year/kg CO2e	4.39034e-11	species.year/FU	1 fridge	573.9	kg CO2e/FU	1 large fridge	per mini fridge	0.3	657	113116	kg CO2e	8.65335e-09	0.000999068	species.year	0
Phase 4 Energy Reduction	Upgrading Fridges	Objet Collection refrigerator	[16]	Global Warming - Terrestrial ecosystems	573.9	kg CO2e/FU	1 fridge	2.8e-09	species.year/kg CO2e	1.60692e-06	species.year/FU	1 fridge	/	kg CO2e/FU	1 large fridge	per mini fridge	0.3	657	/	kg CO2e	0.000316724		species.year	0
Phase 4 Energy Reduction	Upgrading Fridges	Objet Collection refrigerator	[16]	Acidification- terrestrial ecosystems	1.749	kg SO2 eq/FU	1 fridge	2.12e-07	species.year/kg SO2 eq	3.70788e-07	species.year/FU	1 fridge			1 large fridge	per mini fridge	0.3	657	0	kg CO2e	7.30823e-05		species.year	0
Phase 4 Energy Reduction	Upgrading Fridges	Objet Collection refrigerator	[16]	Freshwater Eutrophication	0.00180223	Kg P eq/FU	1 fridge	6.71e-07	species.year/kg P eq	1.2093e-09	species.year/FU	1 fridge			1 large fridge	per mini fridge	0.3	657	0	kg CO2e	2.38352e-07		species.year	0
Phase 4 Energy Reduction	Upgrading Fridges	Objet Collection refrigerator	[16]	Water consumption	228.88	m3/FU	1 fridge	1.35e-08	species.year/m3	3.08988e-06	species.year/FU	1 fridge			1 large fridge	per mini fridge	0.3	657	0	kg CO2e	0.000609014		species.year	0
Phase 4 Energy Reduction	Upgrading Ovens	Electric Oven	[17]	Global Warming - Terrestrial ecosystems	161.2	kg CO2e/FU	1 oven	7.65e-14	species.year/kg CO2e	1.23318e-11	species.year/FU	1 oven	161.2	kg CO2e/FU	1 oven	1 oven	1	330	53196	kg CO2e	4.06949e-09	0.000270384		Materials and manufacturing, realistic scenario
Phase 4 Energy Reduction	Upgrading Ovens	Electric Oven	[17]	Global Warming - Freshwater ecosystems	161.2	kg CO2e/FU	1 oven	2.8e-09	species.year/kg CO2e	4.5136e-07	species.year/FU	1 oven			1 oven	1 oven	1	330	0	kg CO2e	0.000148949			Materials and manufacturing, realistic scenario
Phase 4 Energy Reduction	Upgrading Ovens	Electric Oven	[17]	Acidification- terrestrial ecosystems	1.223	kg SO2 eq/FU	1 oven	2.12e-07	species.year/kg SO2 eq	2.59276e-07	species.year/FU	1 oven			1 oven	1 oven	1	330	0	kg CO2e	8.55611e-05			Materials and manufacturing, realistic scenario
Phase 4 Energy Reduction	Upgrading Ovens	Electric Oven	[17]	Freshwater Eutrophication	0.1136	Kg P eq/FU	1 oven	6.71e-07	species.year/kg P eq	7.62256e-08	species.year/FU	1 oven			1 oven	1 oven	1	330	0	kg CO2e	2.51544e-05			Materials and manufacturing, realistic scenario
Phase 4 Energy Reduction	Upgrading Ovens	Electric Oven	[17]	Marine Eutrophication	0.0463	kg N eq/FU	1 oven	1.7e-09	species.year/kg N eq	7.871e-11	species.year/FU	1 oven			1 oven	1 oven	1	330	0	kg CO2e	2.59743e-08			Materials and manufacturing, realistic scenario
Phase 4 Energy Reduction	Upgrading Ovens	Electric Oven	[17]	Photochemical ozone formation - Terrestrial ecosystems	0.17255	kg Nox eq/FU	1 oven	1.29e-07	species.year/kg Nox	2.22589e-08	species.year/FU	1 oven			1 oven	1 oven	1	330	0	kg CO2e	7.34545e-06			Materials and manufacturing, realistic scenario
Phase 4 Energy Reduction	Upgrading Ovens	Electric Oven	[17]	Freshwater Ecotoxicity	7.359	kg 1-4 DCB eq/FU	1 oven	6.95e-10	species.year/kg 1-4 DCB eq	5.11451e-09	species.year/FU	1 oven			1 oven	1 oven	1	330	0	kg CO2e	1.68779e-06			Materials and manufacturing, realistic scenario
Phase 4 Energy Reduction	Upgrading Ovens	Electric Oven	[17]	Marine Ecotoxicity	7.222	kg 1-4 DCB eq/FU	1 oven	6.95e-10	species.year/kg 1-4 DCB eq	5.01929e-09	species.year/FU	1 oven			1 oven	1 oven	1	330	0	kg CO2e	1.65637e-06			Materials and manufacturing, realistic scenario
Phase 4 Energy Reduction	Upgrading Hobs	Electronic boards for hob	[18]	Acidification- terrestrial ecosystems	0.4456	kg SO2 eq/FU	1 hob	2.12e-07	species.year/kg SO2 eq	9.44672e-08	species.year/FU	1 hob			1 hob	per hob	1	44	0	kg CO2e	4.15656e-06		species.year	Electronic board parts only
Phase 4 Energy Reduction	Upgrading Hobs	Electronic boards for hob	[18]	Freshwater Eutrophication	0.11352	Kg P eq/FU	1 hob	6.71e-07	species.year/kg P eq	7.61719e-08	species.year/FU	1 hob			1 hob	per hob	1	44	0	kg CO2e	3.35156e-06		species.year	Electronic board parts only
Phase 4 Energy Reduction	Upgrading Hobs	Electronic boards for hob	[18]	Global Warming - Freshwater ecosystems	72.61	kg CO2e/FU	1 hob	7.65e-14	species.year/kg CO2e	5.55467e-12	species.year/FU	1 hob	72.61	kg CO2e/FU	1 hob	per hob	1	44	3194.84	kg CO2e	2.44405e-10	1.87623e-05	species.year	Electronic board parts only
Phase 4 Energy Reduction	Upgrading Hobs	Electronic boards for hob	[18]	Global Warming - Terrestrial ecosystems	72.61	kg CO2e/FU	1 hob	2.8e-09	species.year/kg CO2e	2.03308e-07	species.year/FU	1 hob	/	kg CO2e/FU	1 hob	per hob	1	44	/	kg CO2e	8.94555e-06		species.year	Electronic board parts only
Phase 4 Energy Reduction	Upgrading Hobs	Electronic boards for hob	[18]	Freshwater Ecotoxicity	75	kg 1-4 DCB eq/FU	1 hob	6.95e-10	species.year/kg 1-4 DCB eq	5.2125e-08	species.year/FU	1 hob			1 hob	per hob	1	44	0	kg CO2e	2.2935e-06		species.year	Electronic board parts only
Phase 4 Energy Reduction	Upgrading Hobs	Electronic boards for hob	[18]	Terrestrial Ecotoxicity	29.6856	kg 1-4 DCB eq/FU	1 hob	1.14e-11	species.year/kg 1-4 DCB eq	3.38416e-10	species.year/FU	1 hob			1 hob	per hob	1	44	0	kg CO2e	1.48903e-08		species.year	Electronic board parts only
Phase 4 Energy Reduction	Upgrading Washing Machine	Washing Machine, Scenario 1	[19]	Global Warming - Freshwater ecosystems	51.726	#REF!	1 dishwasher	7.65e-14	species.year/kg CO2e	3.95704e-12	species.year/FU	1 dishwasher	51.726	kg CO2e/FU	1 dishwasher	per washing machine	1	14	724.164	kg CO2e	5.53985e-11	2.02771e-06	species.year	Bought new, assuming baseline scenario, assume washer and dryer same impacts
Phase 4 Energy Reduction	Upgrading Washing Machine	Washing Machine, Scenario 1	[19]	Global Warming - Terrestrial ecosystems	51.726	#REF!	1 dishwasher	2.8e-09	species.year/kg CO2e	1.44833e-07	species.year/FU	1 dishwasher	/	kg CO2e/FU	1 dishwasher	per washing machine	1	14	/	kg CO2e	2.02766e-06		species.year	Bought new, assuming baseline scenario, assume washer and dryer same impacts
Phase 4 Energy Reduction	Upgrading HVAC units	NA	NA	NA	NA	#REF!	NA	NA	NA	#VALUE!	NA	NA	NA		each	each	1	19	0	kg CO2e	0	0	species.year
Phase 4 Energy Reduction	LED Bulp & Fitting Replacement (Works Project)	i60-1200 LED 4600 HF OP	[20]	Global Warming - Freshwater ecosystems	37.1138	#REF!	1 fitting	7.65e-14	species.year/kg CO2e	2.83921e-12	species.year/FU	1 fitting	37.1138	kg CO2e/FU	1 fitting	per fitting	1	820.54	30453.4	kg CO2e	2.32968e-09	0.000150555	species.year	lots of different LEDs to choose from, probably good for sensitivity analysis?
Phase 4 Energy Reduction	LED Bulp & Fitting Replacement (Works Project)	i60-1200 LED 4600 HF OP	[20]	Global Warming - Terrestrial ecosystems	37.1138	#REF!	1 fitting	2.8e-09	species.year/kg CO2e	1.03919e-07	species.year/FU	1 fitting	/	kg CO2e/FU	1 fitting	per fitting	1	820.54	/	kg CO2e	8.52694e-05		species.year	lots of different LEDs to choose from, probably good for sensitivity analysis?
Phase 4 Energy Reduction	LED Bulp & Fitting Replacement (Works Project)	i60-1200 LED 4600 HF OP	[20]	Acidification- terrestrial ecosystems	0.333069	kg SO2 eq/FU	1 fitting	2.12e-07	species.year/kg SO2 eq	7.06107e-08	species.year/FU	1 fitting			1 fitting	per fitting	1	820.54	0	kg CO2e	5.79389e-05		species.year	lots of different LEDs to choose from, probably good for sensitivity analysis?
Phase 4 Energy Reduction	LED Bulp & Fitting Replacement (Works Project)	i60-1200 LED 4600 HF OP	[20]	Freshwater Eutrophication	0.00411757	Kg P eq/FU	1 fitting	6.71e-07	species.year/kg P eq	2.76289e-09	species.year/FU	1 fitting			1 fitting	per fitting	1	820.54	0	kg CO2e	2.26706e-06		species.year	lots of different LEDs to choose from, probably good for sensitivity analysis?
Phase 4 Energy Reduction	LED Bulp & Fitting Replacement (Works Project)	i60-1200 LED 4600 HF OP	[20]	Marine Eutrophication	0.0367723	kg N eq/FU	1 fitting	1.7e-09	species.year/kg N eq	6.25129e-11	species.year/FU	1 fitting			1 fitting	per fitting	1	820.54	0	kg CO2e	5.12943e-08		species.year	lots of different LEDs to choose from, probably good for sensitivity analysis?
Phase 4 Energy Reduction	LED Bulp & Fitting Replacement (Works Project)	i60-1200 LED 4600 HF OP	[20]	Photochemical ozone formation - Terrestrial ecosystems	0.0377456	kg Nox eq/FU	1 fitting	1.29e-07	species.year/kg Nox	4.86918e-09	species.year/FU	1 fitting			1 fitting	per fitting	1	820.54	0	kg CO2e	3.99536e-06		species.year	lots of different LEDs to choose from, probably good for sensitivity analysis?
Phase 4 Energy Reduction	LED Bulp & Fitting Replacement (Works Project)	i60-1200 LED 4600 HF OP	[20]	Water consumption	2079.59	m3/FU	1 fitting	6.04e-13	species.year/m3	1.25607e-09	species.year/FU	1 fitting			1 fitting	per fitting	1	820.54	0	kg CO2e	1.03066e-06		species.year	lots of different LEDs to choose from, probably good for sensitivity analysis?
Phase 4 Energy Reduction	Lighting Occupancy (SALTO)	NA	NA	Global Warming - Freshwater ecosystems	0	kg CO2e/FU	per room	7.65e-14	NA	0	species.year/FU	per room	0	kg CO2e/FU	per room	per room	1	620	0	kg CO2e	0	0	species.year
Phase 4 Energy Reduction	Underfloor Heating required when using Ground source heat pumps	Underfloor heating system- Brass & Fittings, S.L.	[21]	Global Warming - Freshwater ecosystems	9.2754	#REF!	m2	7.65e-14	species.year/kg CO2e	7.09568e-13	species.year/FU	m2	9.2754	kg CO2e/FU	m2	per room	32.7149	510.001	154756	kg CO2e	1.18389e-08	0.000605147	species.year	T45 insulation board, PERT EVOH pipe system and manifold cabinet with 2 manifolds and 8 circutes- others available
Phase 4 Energy Reduction	Underfloor Heating required when using Ground source heat pumps	Underfloor heating system- Brass & Fittings, S.L.	[21]	Global Warming - Terrestrial ecosystems	9.2754	#REF!	m2	2.8e-09	species.year/kg CO2e	2.59711e-08	species.year/FU	m2	/	kg CO2e/FU	m2	per room	32.7149	510.001	/	kg CO2e	0.000433318		species.year	T45 insulation board, PERT EVOH pipe system and manifold cabinet with 2 manifolds and 8 circutes- others available
Phase 4 Energy Reduction	Underfloor Heating required when using Ground source heat pumps	Underfloor heating system- Brass & Fittings, S.L.	[21]	Acidification- terrestrial ecosystems	0.043288	kg SO2 eq/FU	m2	2.12e-07	species.year/kg SO2 eq	9.17706e-09	species.year/FU	m2			m2	per room	32.7149	510.001	0	kg CO2e	0.000153116		species.year	T45 insulation board, PERT EVOH pipe system and manifold cabinet with 2 manifolds and 8 circutes- others available
Phase 4 Energy Reduction	Underfloor Heating required when using Ground source heat pumps	Underfloor heating system- Brass & Fittings, S.L.	[21]	Freshwater Eutrophication	0.000153374	#REF!	m2	6.71e-07	species.year/kg P eq	1.02914e-10	species.year/FU	m2			m2	per room	32.7149	510.001	0	kg CO2e	1.71708e-06		species.year	T45 insulation board, PERT EVOH pipe system and manifold cabinet with 2 manifolds and 8 circutes- others available
Phase 4 Energy Reduction	Underfloor Heating required when using Ground source heat pumps	Underfloor heating system- Brass & Fittings, S.L.	[21]	Marine Eutrophication	0.0058585	#REF!	m2	1.7e-09	species.year/kg N eq	9.95945e-12	species.year/FU	m2			m2	per room	32.7149	510.001	0	kg CO2e	1.6617e-07		species.year	T45 insulation board, PERT EVOH pipe system and manifold cabinet with 2 manifolds and 8 circutes- others available
Phase 4 Energy Reduction	Underfloor Heating required when using Ground source heat pumps	Underfloor heating system- Brass & Fittings, S.L.	[21]	Photochemical ozone formation - Terrestrial ecosystems	0.00778691	kg Nox eq/FU	m2	1.29e-07	species.year/kg Nox	1.00451e-09	species.year/FU	m2			m2	per room	32.7149	510.001	0	kg CO2e	1.67599e-05		species.year	T45 insulation board, PERT EVOH pipe system and manifold cabinet with 2 manifolds and 8 circutes- others available
Phase 4 Energy Reduction	Underfloor Heating required when using Ground source heat pumps	Underfloor heating system- Brass & Fittings, S.L.	[21]	Water consumption	5.73944	#REF!	m2	6.04e-13	species.year/m3	3.46662e-12	species.year/FU	m2			m2	per room	32.7149	510.001	0	kg CO2e	5.78393e-08		species.year	T45 insulation board, PERT EVOH pipe system and manifold cabinet with 2 manifolds and 8 circutes- others available
Phase 4 Energy Reduction	Replacement Larger radiators required when using ground source heat pumps as heat source	Lyngson radiator type 22 size – h500mm x L700 mm	[22]	Global Warming - Freshwater ecosystems	7.09698	#REF!	1 radiator	7.65e-14	species.year/kg CO2e	5.42919e-13	species.year/FU	1 radiator	7.09698	kg CO2e/FU	1 radiator	per room	1.5	537.143	5718.14	kg CO2e	4.37438e-10	3.79063e-05	species.year	Assuming heat pump suitable radiator is the same components as normal radiator
Phase 4 Energy Reduction	Replacement Larger radiators required when using ground source heat pumps as heat source	Lyngson radiator type 22 size – h500mm x L700 mm	[22]	Global Warming - Terrestrial ecosystems	7.09698	#REF!	1 radiator	2.8e-09	species.year/kg CO2e	1.98716e-08	species.year/FU	1 radiator	/	kg CO2e/FU	1 radiator	per room	1.5	537.143	/	kg CO2e	1.60108e-05		species.year	Assuming heat pump suitable radiator is the same components as normal radiator
Phase 4 Energy Reduction	Replacement Larger radiators required when using ground source heat pumps as heat source	Lyngson radiator type 22 size – h500mm x L700 mm	[22]	Acidification- terrestrial ecosystems	0.0952913	kg SO2 eq/FU	1 radiator	2.12e-07	species.year/kg SO2 eq	2.02018e-08	species.year/FU	1 radiator			1 radiator	per room	1.5	537.143	0	kg CO2e	1.62768e-05		species.year	Assuming heat pump suitable radiator is the same components as normal radiator
Phase 4 Energy Reduction	Replacement Larger radiators required when using ground source heat pumps as heat source	Lyngson radiator type 22 size – h500mm x L700 mm	[22]	Freshwater Eutrophication	0.00962339	#REF!	1 radiator	6.71e-07	species.year/kg P eq	6.4573e-09	species.year/FU	1 radiator			1 radiator	per room	1.5	537.143	0	kg CO2e	5.20274e-06		species.year	Assuming heat pump suitable radiator is the same components as normal radiator
Phase 4 Energy Reduction	Replacement Larger radiators required when using ground source heat pumps as heat source	Lyngson radiator type 22 size – h500mm x L700 mm	[22]	Marine Eutrophication	0.0132263	#REF!	1 radiator	1.7e-09	species.year/kg N eq	2.24847e-11	species.year/FU	1 radiator			1 radiator	per room	1.5	537.143	0	kg CO2e	1.81163e-08		species.year	Assuming heat pump suitable radiator is the same components as normal radiator
Phase 4 Energy Reduction	Replacement Larger radiators required when using ground source heat pumps as heat source	Lyngson radiator type 22 size – h500mm x L700 mm	[22]	Photochemical ozone formation - Terrestrial ecosystems	0.00381228	kg Nox eq/FU	1 radiator	1.29e-07	species.year/kg Nox	4.91784e-10	species.year/FU	1 radiator			1 radiator	per room	1.5	537.143	0	kg CO2e	3.96238e-07		species.year	Assuming heat pump suitable radiator is the same components as normal radiator
Phase 4 Energy Reduction	Replacement Larger radiators required when using ground source heat pumps as heat source	Lyngson radiator type 22 size – h500mm x L700 mm	[22]	Water consumption	2.28412	#REF!	1 radiator	6.04e-13	species.year/m3	1.37961e-12	species.year/FU	1 radiator			1 radiator	per room	1.5	537.143	0	kg CO2e	1.11157e-09		species.year	Assuming heat pump suitable radiator is the same components as normal radiator
Phase 4 Energy Reduction	Carpets/carpet Tiles replacements as carpets to be removed to fit unde floor heating	tiltnturn Carpet Tiles- Burmatex	[23]	Global Warming - Freshwater ecosystems	14.497	#REF!	m2	7.65e-14	species.year/kg CO2e	1.10902e-12	species.year/FU	m2	14.497	kg CO2e/FU	m2	per room	32.7149	521.667	247410	kg CO2e	1.89269e-08	0.00139609	species.year	UK based company, nylon yarn and recycled backing
Phase 4 Energy Reduction	Carpets/carpet Tiles replacements as carpets to be removed to fit unde floor heating	tiltnturn Carpet Tiles- Burmatex	[23]	Global Warming - Terrestrial ecosystems	14.497	#REF!	m2	2.8e-09	species.year/kg CO2e	4.05917e-08	species.year/FU	m2	/	kg CO2e/FU	m2	per room	32.7149	521.667	/	kg CO2e	0.000692748		species.year	UK based company, nylon yarn and recycled backing
Phase 4 Energy Reduction	Carpets/carpet Tiles replacements as carpets to be removed to fit unde floor heating	tiltnturn Carpet Tiles- Burmatex	[23]	Acidification- terrestrial ecosystems	0.115312	kg SO2 eq/FU	m2	2.12e-07	species.year/kg SO2 eq	2.44461e-08	species.year/FU	m2			m2	per room	32.7149	521.667	0	kg CO2e	0.000417203		species.year	UK based company, nylon yarn and recycled backing
Phase 4 Energy Reduction	Carpets/carpet Tiles replacements as carpets to be removed to fit unde floor heating	tiltnturn Carpet Tiles- Burmatex	[23]	Freshwater Eutrophication	0.0219509	#REF!	m2	6.71e-07	species.year/kg P eq	1.4729e-08	species.year/FU	m2			m2	per room	32.7149	521.667	0	kg CO2e	0.00025137		species.year	UK based company, nylon yarn and recycled backing
Phase 4 Energy Reduction	Carpets/carpet Tiles replacements as carpets to be removed to fit unde floor heating	tiltnturn Carpet Tiles- Burmatex	[23]	Marine Eutrophication	0.027699	#REF!	m2	1.7e-09	species.year/kg N eq	4.70883e-11	species.year/FU	m2			m2	per room	32.7149	521.667	0	kg CO2e	8.03621e-07		species.year	UK based company, nylon yarn and recycled backing
Phase 4 Energy Reduction	Carpets/carpet Tiles replacements as carpets to be removed to fit unde floor heating	tiltnturn Carpet Tiles- Burmatex	[23]	Photochemical ozone formation - Terrestrial ecosystems	0.0153675	kg Nox eq/FU	m2	1.29e-07	species.year/kg Nox	1.98241e-09	species.year/FU	m2			m2	per room	32.7149	521.667	0	kg CO2e	3.38324e-05		species.year	UK based company, nylon yarn and recycled backing
Phase 4 Energy Reduction	Carpets/carpet Tiles replacements as carpets to be removed to fit unde floor heating	tiltnturn Carpet Tiles- Burmatex	[23]	Water consumption	11.0801	#REF!	m2	6.04e-13	species.year/m3	6.69237e-12	species.year/FU	m2			m2	per room	32.7149	521.667	0	kg CO2e	1.14214e-07		species.year	UK based company, nylon yarn and recycled backing
Phase 4 Energy Reduction	Trend BMS upgrade	NA	NA	NA	NA	NA	NA	NA	NA	#VALUE!	NA	NA	NA		Per plant room	Per plant room	1	21	0	kg CO2e	0	0	species.year
Phase 4 Energy Reduction	All Day Storage heaters run by air source heat pumps	NA	NA	NA	NA	NA	NA	NA	NA	#VALUE!	NA	NA	NA		per room	per room	1	19	0	kg CO2e	0	0	species.year
Phase 5 Install Sustainable Energy Generation Solutions	SunAmp Cubes (Parks Road £340,000 Merifield £50,000 DWB £100,000) to replace Calorifiers	SunAmp 300hp	[28]	Global Warming - Freshwater ecosystems	823.697	kg CO2e/FU	per SunAmp	7.65e-14	species.year/kg CO2e	6.30128e-11	species.year/FU	per SunAmp	823.697	kg CO2e/FU	per SunAmp	per SC	1	94.75	78045.3	kg CO2e	5.97046e-09	0.000218533	species.year	SunAmp own calculations, biggest size and suitable for heat pump
Phase 5 Install Sustainable Energy Generation Solutions	SunAmp Cubes (Parks Road £340,000 Merifield £50,000 DWB £100,000) to replace Calorifiers	SunAmp 300hp	[28]	Global Warming - Terrestrial ecosystems	823.697	kg CO2e/FU	per SunAmp	2.8e-09	species.year/kg CO2e	2.30635e-06	species.year/FU	per SunAmp	/	kg CO2e/FU	per SunAmp	per SC	1	94.75	/	kg CO2e	0.000218527		species.year	SunAmp own calculations, biggest size and suitable for heat pump
Phase 5 Install Sustainable Energy Generation Solutions	Ground Source Heat Pumps (DWB, Parks Road & Merifield)	Ground Source Heat Pump 2	[25]	Global Warming - Freshwater ecosystems	10200	kg CO2e/FU	over 20 years	7.65e-14	species.year/kg CO2e	7.803e-10	species.year/FU	per module	10200	kg CO2e/FU	per module	per GSHP	1	23	234600	kg CO2e	1.79469e-08	0.000794338	species.year
Phase 5 Install Sustainable Energy Generation Solutions	Ground Source Heat Pumps (DWB, Parks Road & Merifield)	Ground Source Heat Pump 2	[25]	Global Warming - Terrestrial ecosystems	10200	kg CO2e/FU	over 20 years	2.8e-09	species.year/kg CO2e	2.856e-05	species.year/FU	per module			per module	per GSHP	1	23	/	kg CO2e	0.00065688		species.year
Phase 5 Install Sustainable Energy Generation Solutions	Ground Source Heat Pumps (DWB, Parks Road & Merifield)	Ground Source Heat Pump 2	[25]	Acidification- terrestrial ecosystems	20.8	kg SO2 eq/FU	over 20 years	2.12e-07	species.year/kg SO2 eq	4.4096e-06	species.year/FU	per module			per module	per GSHP	1	23	0	kg CO2e	0.000101421		species.year
Phase 5 Install Sustainable Energy Generation Solutions	Ground Source Heat Pumps (DWB, Parks Road & Merifield)	Ground Source Heat Pump 2	[25]	Freshwater Eutrophication	0.16	Kg P eq/FU	over 20 years	6.71e-07	species.year/kg P eq	1.0736e-07	species.year/FU	per module			per module	per GSHP	1	23	0	kg CO2e	2.46928e-06		species.year
Phase 5 Install Sustainable Energy Generation Solutions	Ground Source Heat Pumps (DWB, Parks Road & Merifield)	Ground Source Heat Pump 2	[25]	Marine Eutrophication	2.9	kg N eq/FU	over 20 years	1.7e-09	species.year/kg N eq	4.93e-09	species.year/FU	per module			per module	per GSHP	1	23	0	kg CO2e	1.1339e-07		species.year
Phase 5 Install Sustainable Energy Generation Solutions	Ground Source Heat Pumps (DWB, Parks Road & Merifield)	Ground Source Heat Pump 2	[25]	Photochemical ozone formation - Terrestrial ecosystems	8.004	kg Nox eq/FU	over 20 years	1.29e-07	species.year/kg Nox	1.03252e-06	species.year/FU	per module			per module	per GSHP	1	23	0	kg CO2e	2.37479e-05		species.year
Phase 5 Install Sustainable Energy Generation Solutions	Ground Source Heat Pumps (DWB, Parks Road & Merifield)	Ground Source Heat Pump 2	[25]	Terrestrial Ecotoxicity	0.4	kg 1-4 DCB eq/FU	over 20 years	1.14e-11	species.year/kg 1-4 DCB eq	4.56e-12	species.year/FU	per module			per module	per GSHP	1	23	0	kg CO2e	1.0488e-10		species.year
Phase 5 Install Sustainable Energy Generation Solutions	Ground Source Heat Pumps (DWB, Parks Road & Merifield)	Ground Source Heat Pump 2	[25]	Freshwater Ecotoxicity	7.8	kg 1-4 DCB eq/FU	over 20 years	6.95e-10	species.year/kg 1-4 DCB eq	5.421e-09	species.year/FU	per module			per module	per GSHP	1	23	0	kg CO2e	1.24683e-07		species.year
Phase 5 Install Sustainable Energy Generation Solutions	Ground Source Heat Pumps (DWB, Parks Road & Merifield)	Ground Source Heat Pump 2	[25]	Marine Ecotoxicity	13.2	kg 1-4 DCB eq/FU	over 20 years	1.05e-10	species.year/kg 1-4 DCB eq	1.386e-09	species.year/FU	per module			per module	per GSHP	1	23	0	kg CO2e	3.1878e-08		species.year
Phase 5 Install Sustainable Energy Generation Solutions	Ground Source Heat Pumps (DWB, Parks Road & Merifield)	Ground Source Heat Pump 2	[25]	Water consumption	30.7	m3/FU	over 20 years	1.35e-08	species.year/m3	4.1445e-07	species.year/FU	per module			per module	per GSHP	1	23	0	kg CO2e	9.53235e-06		species.year
Phase 5 Install Sustainable Energy Generation Solutions	PV (Solar Panels) small arrays some to generate electricity most to generate hot water	mono si module	[27]	Global Warming - Freshwater ecosystems	49.5435	kg CO2e/FU	kWh	7.65e-14	species.year/kg CO2e	3.79007e-12	species.year/FU	per module	49.5435	kg CO2e/FU	per module	per module	1	850	42111.9	kg CO2e	3.22156e-09	0.000135044	species.year
Phase 5 Install Sustainable Energy Generation Solutions	PV (Solar Panels) small arrays some to generate electricity most to generate hot water	mono si module	[27]	Global Warming - Terrestrial ecosystems	49.5435	kg CO2e/FU	kWh	2.8e-09	species.year/kg CO2e	1.38722e-07	species.year/FU	per module	/	kg CO2e/FU	per module	per module	1	850	/	kg CO2e	0.000117913		species.year
Phase 5 Install Sustainable Energy Generation Solutions	PV (Solar Panels) small arrays some to generate electricity most to generate hot water	mono si module	[27]	Acidification- terrestrial ecosystems	0.0464881	kg SO2 eq/FU	kWh	2.12e-07	species.year/kg SO2 eq	9.85548e-09	species.year/FU	per module			per module	per module	1	850	0	kg CO2e	8.37716e-06		species.year
Phase 5 Install Sustainable Energy Generation Solutions	PV (Solar Panels) small arrays some to generate electricity most to generate hot water	mono si module	[27]	Freshwater Eutrophication	0.0153411	Kg P eq/FU	kWh	6.71e-07	species.year/kg P eq	1.02939e-08	species.year/FU	per module			per module	per module	1	850	0	kg CO2e	8.74978e-06		species.year
Phase 5 Install Sustainable Energy Generation Solutions	Air Source Heat Pumps (DWB, Parks Road & Merifield)	Air Source Heat Pump 1	[26]	Global Warming - Freshwater ecosystems	2655	kg CO2e/FU	kWh	7.65e-14	species.year/kg CO2e	2.03108e-10	species.year/FU	kWh	2655	kg CO2e/FU	kWh	Per Module	1	61.3333	162840	kg CO2e	1.24573e-08	0.000455964	species.year
Phase 5 Install Sustainable Energy Generation Solutions	Air Source Heat Pumps (DWB, Parks Road & Merifield)	Air Source Heat Pump 1	[26]	Global Warming - Terrestrial ecosystems	2655	kg CO2e/FU	kWh	2.8e-09	species.year/kg CO2e	7.434e-06	species.year/FU	kWh	/	kg CO2e/FU	kWh	Per Module	1	61.3333	/	kg CO2e	0.000455952		species.year
Phase 5 Install Sustainable Energy Generation Solutions	Upgrade of Love Lane Transformer by SSE should it be required	NA	NA	NA	NA	NA	NA	NA	NA	#VALUE!	NA	NA			each	each	1	1	0	kg CO2e	0	0	species.year
Phase 5 Install Sustainable Energy Generation Solutions	Landscaping due to ground source heat pump installing and changes to underground services	na	NA	NA	NA	NA	NA	NA	NA	#VALUE!	NA	NA	NA	N	per GSHP	per GSHP	1	23	0	kg CO2e	0	0	species.year
Phase 5 Install Sustainable Energy Generation Solutions	Upgrading of services pipework (Electric, Water, Gas pipe and meter removal and changes to Sewerage system	NA	NA	NA	NA	NA	NA	NA	NA	#VALUE!	NA	NA			per staircase	per staircase	1	74	0	kg CO2e	0	0	species.year
Functional unit characterisation factors
Phase of planned works	Reference Planned work	Current Unit	Functional Unit	characterisation Factor
Phase 1 Energy Monitoring	Installing meters to measure Heat and Electric at point of use (Per Staircase)	Per Staircase	Per Staircase	1
Phase 1 Energy Monitoring	Heating Occupancy (EyeSeaGreen)	per room	per room	1
Phase 2 Surveys	Electric Metering Survey	per SC	per SC	1
Phase 2 Surveys	Loft Surveys	per SC	per SC	1
Phase 2 Surveys	Window Surveys	Per room	Per room	1
Phase 2 Surveys	Building fabric	Hr per room	Hr per room	1
Phase 2 Surveys	Pipes	Hr per room	Hr per room	1
Phase 2 Surveys	Pumps	plant room	plant room	1
Phase 3 Improve Building Fabric	Windows replace glazing with Vacuum (Grade 2 Listed) & Secondary and Triple where appropriate.	m2	Per Window	0.984711
Phase 3 Improve Building Fabric	Designing and constructing/fitting Heritage Shutters HMR & Front Quad	m2	Per Window	0.984711
Phase 3 Improve Building Fabric	Insulate Lofts	m2	m2	1
Phase 3 Improve Building Fabric	Seal Air Gaps	kg	per room	0.0328059
Phase 3 Improve Building Fabric	Window apertures/architraves (sealing/draught proofing)	kg	per Window	10.7674
Phase 3 Improve Building Fabric	Suspended Floors Spraying (Q Bot)	m2	m2	1
Phase 3 Improve Building Fabric	Insulate Cold Bridges	per room	per room	1
Phase 3 Improve Building Fabric	Adding internal Insulation on Cold External walls plus plastering and decoration	m2	per room	11.6682
Phase 3 Improve Building Fabric	Cavity Wall Insulation	m2	per wall	11.6682
Phase 3 Improve Building Fabric	External Doors (Glass)	m2	per door	1.94682
Phase 4 Energy Reduction	Lagging of Heating pipes	m3	Per 5 meter	0.0065
Phase 4 Energy Reduction	Lagging of Hot Water Pipes	m3	Per 5 meter	0.0065
Phase 4 Energy Reduction	Replace Pumps	1 pump	1 pump	1
Phase 4 Energy Reduction	Upgrading Fridges	1 large fridge	per mini fridge	0.3
Phase 4 Energy Reduction	Upgrading Ovens	per oven	per oven	1
Phase 4 Energy Reduction	Upgrading Hobs	per oven	per hob	1
Phase 4 Energy Reduction	Upgrading Washing Machine	per washing machine	per washing machine	1
Phase 4 Energy Reduction	Upgrade HVAC units	per HVAC unit	per HVAC unit	1
Phase 4 Energy Reduction	LED Bulp & Fitting Replacement (Works Project)	per fitting	per fitting	1
Phase 4 Energy Reduction	Lighting Occupancy (SALTO)	per room	per room	1
Phase 4 Energy Reduction	Underfloor Heating required when using Ground source heat pumps	m2	per room	32.7149
Phase 4 Energy Reduction	Replacement Larger radiators required when using ground source heat pumps as heat source	1 radiator	per room	1.5
Phase 4 Energy Reduction	Carpets/carpet Tiles replacements as carpets to be removed to fit unde floor heating	m2	per room	32.7149
Phase 4 Energy Reduction	TREND BMS upgrade	per plant room	per plant room	1
Phase 4 Energy Reduction	All Day Storage heaters run by air source heat pumps	per room	per room	1
Phase 5 Install Sustainble Energy Generation Solutions	SunAmp Cubes (Parks Road £340,000 Merifield £50,000 DWB £100,000) to replace Calorifiers	per SunAmp	per staircase	1
Phase 4 Energy Reduction	Hydrogen Ready/Electric Boilers	per boiler	per boiler	1
Phase 5 Install Sustainble Energy Genration Solutions	Ground Source Heat Pumps (DWB, Parks Road & Merifield)	per module	per module	1
Phase 5 Install Sustainble Energy Genration Solutions	PV (Solar Panels) small arrays some to generate electricity most to generate hot water	per module	per module	1
Phase 5 Install Sustainble Energy Genration Solutions	Air Source Heat Pumps (DWB, Parks Road & Merifield)	per module	per module	1
Phase 5 Install Sustainble Energy Genration Solutions	Upgrade of Love Lane Transformer by SSE should it be required	each	each	1
Phase 5 Install Sustainble Energy Genration Solutions	Landscaping due to ground source heat pump installing and changes to underground services	per quad	per quad	1
Phase 5 Install Sustainble Energy Genration Solutions	Upgrading of services pipework (Electric, Water, Gas pipe and meter removal and changes to Sewerage system	per SC	per SC	1
Estates data	Value	Unit
Total internal m2	32902	m2
Number of rooms	1005.72	NA
Average room m2	32.7149	m2

## Sheet: 5. Cost-effective
Table 1: Trajectories from the cost effective strategy, ReCiPe
Activity		Fuel Savings (%)										Electricity Savings (%)										Fuel Savings- lower Bound			Fuel Savings- Upper Bound			Fuel Savings- Median Bound			Electricity Savings- lower Bound			Electricity Savings- upper Bound			Electricity Savings- median		Additional electricity requirements, lower bound									Additional electricity requirements, lower bound
Year	Reference Planned work	Lower Bound	Adjusted Baseline	Cumulative fuel savings (based on adjusted baseline) (lower bound)	Upper Bound	Adjusted baseline	Cumulative fuel savings	Median Savings	Adjusted baseline	Cumulative fuel savings	Lower bound	Adjusted Baseline	Cumulative electricity savings	Upper Bound	Adjusted baseline	Cumulative electricity savings	Median Savings	Adjusted baseline	Cumulative electricity savings	kwH	Carbon	Biodiversity	kwH	Carbon	Biodiversity	kwh	Carbon	Biodiversity	kwh	Carbon	Biodiversity	kwh	Carbon	Biodiversity	kwh	Carbon	Biodiversity	Fuel converted to electricity (%, from fuel baseline)	fuel kwh	additional requirement from air source heat pumps	additional requirement from ground source heat pumps	additional requirement from boilers	total kwh requirement	additional savings, lower bound	Adjusted Baseline	final kwh requirement	Fuel converted to electricity (%, from fuel baseline)	fuel kwh	additional requirement from air source heat pumps
2022	NA	0	1			1			1			1			1			1																				0	0				0	0	1	0	0	0
2022	Installing meters to measure Heat and Electric at point of use (Per Staircase)	0	1	0	0	1	0	0	1		0	1	0	0	1	0	0	1	0	0	0	0	0	0	0	0	0	0	0	0	0	0	0	0	0	0	0	0	0	0	0	0	0	0	1	0	0	0	0
2023	Heating Occupancy (EyeSeaGreen)	0.11	0.89	0.11	0.34	0.66	0.34	0.225	0.775	0.225	0	1	0	0	1	0	0	1	0	436085	93165.2	0.00038193	1.3479e+06	287965	0.00118051	891992	190565	0.000781219	0	0	0	0	0	0	0	0	0	0	0	0	0	0	0	0	1	0	0	0	0
2023	Electric Metering Survey	0	0.89	0.11	0	0.66	0.34	0	0.775	0.225	0	1	0	0	1	0	0	1	0	436085	93165.2	0.00038193	1.3479e+06	287965	0.00118051	891992	190565	0.000781219	0	0	0	0	0	0	0	0	0	0	0	0	0	0	0	0	1	0	0	0	0
2023	Loft Surveys	0	0.89	0.11	0	0.66	0.34	0	0.775	0.225	0	1	0	0	1	0	0	1	0	436085	93165.2	0.00038193	1.3479e+06	287965	0.00118051	891992	190565	0.000781219	0	0	0	0	0	0	0	0	0	0	0	0	0	0	0	0	1	0	0	0	0
2024	Window Surveys	0	0.89	0.11	0	0.66	0.34	0	0.775	0.225	0	1	0	0	1	0	0	1	0	436085	93165.2	0.00038193	1.3479e+06	287965	0.00118051	891992	190565	0.000781219	0	0	0	0	0	0	0	0	0	0	0	0	0	0	0	0	1	0	0	0	0
2024	Building fabric	0	0.89	0.11	0	0.66	0.34	0	0.775	0.225	0	1	0	0	1	0	0	1	0	436085	93165.2	0.00038193	1.3479e+06	287965	0.00118051	891992	190565	0.000781219	0	0	0	0	0	0	0	0	0	0	0	0	0	0	0	0	1	0	0	0	0
2024	Pipes	0	0.89	0.11	0	0.66	0.34	0	0.775	0.225	0	1	0	0	1	0	0	1	0	436085	93165.2	0.00038193	1.3479e+06	287965	0.00118051	891992	190565	0.000781219	0	0	0	0	0	0	0	0	0	0	0	0	0	0	0	0	1	0	0	0	0
2025	Pumps	0	0.89	0.11	0	0.66	0.34	0	0.775	0.225	0	1	0	0	1	0	0	1	0	436085	93165.2	0.00038193	1.3479e+06	287965	0.00118051	891992	190565	0.000781219	0	0	0	0	0	0	0	0	0	0	0	0	0	0	0	0	1	0	0	0	0
2025	Suspended Floors Spraying (Q Bot)	0.088	0.81168	0.18832	0.25	0.495	0.505	0.169	0.644025	0.355975	0	1	0	0	1	0	0	1	0	746578	159499	0.000653863	2.00203e+06	427713	0.0017534	1.41123e+06	301495	0.00123598	0	0	0	0	0	0	0	0	0	0	0	0	0	0	0	0	1	0	0	0	0
2025	Insulate Lofts	0.039	0.780024	0.219976	0.17	0.41085	0.58915	0.1045	0.576724	0.423276	0	1	0	0	1	0	0	1	0	872073	186310	0.000763774	2.33563e+06	498985	0.00204558	1.67804e+06	358496	0.00146965	0	0	0	0	0	0	0	0	0	0	0	0	0	0	0	0	1	0	0	0	0
2025	Adding internal Insulation on Cold External walls plus plastering and decoration	0.132	0.677061	0.322939	0.68	0.131472	0.868528	0.406	0.342574	0.657426	0	1	0	0	1	0	0	1	0	1.28026e+06	273515	0.00112127	3.4432e+06	735606	0.0030156	2.60631e+06	556811	0.00228264	0	0	0	0	0	0	0	0	0	0	0	0	0	0	0	0	1	0	0	0	0
2025	All Day Storage heaters run by air source heat pumps	0	0.677061	0.322939	0	0.131472	0.868528	0	0.342574	0.657426	0	1	0	0	1	0	0	1	0	1.28026e+06	273515	0.00112127	3.4432e+06	735606	0.0030156	2.60631e+06	556811	0.00228264	0	0	0	0	0	0	0	0	0	0	0	0	0	0	0	0	1	0	0	0	0
2026	Replacement Larger radiators required when using ground source heat pumps as heat source	0	0.677061	0.322939	0	0.131472	0.868528	0	0.342574	0.657426	0	1	0	0	1	0	0	1	0	1.28026e+06	273515	0.00112127	3.4432e+06	735606	0.0030156	2.60631e+06	556811	0.00228264	0	0	0	0	0	0	0	0	0	0	0	0	0	0	0	0	1	0	0	0	0
2026	Carpets/carpet Tiles replacements as carpets to be removed to fit unde floor heating	0	0.677061	0.322939	0	0.131472	0.868528	0	0.342574	0.657426	0	1	0	0	1	0	0	1	0	1.28026e+06	273515	0.00112127	3.4432e+06	735606	0.0030156	2.60631e+06	556811	0.00228264	0	0	0	0	0	0	0	0	0	0	0	0	0	0	0	0	1	0	0	0	0
2026	Underfloor Heating required when using Ground source heat pumps	0	0.677061	0.322939	0	0.131472	0.868528	0	0.342574	0.657426	0	1	0	0	1	0	0	1	0	1.28026e+06	273515	0.00112127	3.4432e+06	735606	0.0030156	2.60631e+06	556811	0.00228264	0	0	0	0	0	0	0	0	0	0	0	0	0	0	0	0	1	0	0	0	0
2026	Air Source Heat Pumps (DWB, Parks Road & Merifield)	0.3		0.526057	0.3		0.90797	0.3		0.760198	0	1	0	0	1	0	0	1	0	2.08551e+06	445548	0.00182652	3.59956e+06	769011	0.00315255	3.01374e+06	643855	0.00263947	0	0	0	0	0	0	0	0	0	0.203118	805245	-297138	0	0	-297138	0	1	-297138	0.0394416	156363	-57698.4
2026	Landscaping due to ground source heat pump installing and changes to underground services	0		0.526057	0		0.90797	0		0.760198	0	1	0	0	1	0	0	1	0	2.08551e+06	445548	0.00182652	3.59956e+06	769011	0.00315255	3.01374e+06	643855	0.00263947	0	0	0	0	0	0	0	0	0	0.203118	805245	-297138	0	0	-297138	0	1	-297138	0.0394416	156363	-57698.4
2027	Ground Source Heat Pumps (DWB, Parks Road & Merifield)	0.45		0.830735	0.45		0.967132	0.45		0.914356	0	1	0	0	1	0	0	1	0	3.29337e+06	703596	0.00288438	3.83411e+06	819119	0.00335797	3.62488e+06	774420	0.00317472	0	0	0	0	0	0	0	0	0	0.507796	2.01311e+06	-297138	-393442	0	-690580	0	1	-690580	0.098604	390907	-57698.4
2027	Seal Air Gaps	0.02		0.830735	0.13		0.967132	0.075		0.914356	0	1	0	0	1	0	0	1	0	3.29337e+06	703596	0.00288438	3.83411e+06	819119	0.00335797	3.62488e+06	774420	0.00317472	0	0	0	0	0	0	0	0	0	0.507796	2.01311e+06	-297138	-393442	0	-690580	0.02	0.98	-676769	0.098604	390907	-57698.4
2027	Insulate Cold Bridges	0		0.830735	0		0.967132	0		0.914356	0	1	0	0	1	0	0	1	0	3.29337e+06	703596	0.00288438	3.83411e+06	819119	0.00335797	3.62488e+06	774420	0.00317472	0	0	0	0	0	0	0	0	0	0.507796	2.01311e+06	-297138	-393442	0	-690580	0	0.98	-676769	0.098604	390907	-57698.4
2027	Upgrading Washing Machine	0		0.830735	0		0.967132	0		0.914356	0.002142	0.997858	0.002142	0.0021	0.9979	0.0021	0.002121	0.997879	0.002121	3.29337e+06	703596	0.00288438	3.83411e+06	819119	0.00335797	3.62488e+06	774420	0.00317472	3953.91	648.424	3.68641e-06	3876.38	635.709	3.61413e-06	3915.15	642.067	3.65027e-06	0.507796	2.01311e+06	-297138	-393442	0	-690580	0	0.98	-676769	0.098604	390907	-57698.4
2027	LED Bulp & Fitting Replacement (Works Project)	0		0.830735	0		0.967132	0		0.914356	0.015	0.98289	0.0171099	0.04	0.957984	0.042016	0.0275	0.970437	0.0295627	3.29337e+06	703596	0.00288438	3.83411e+06	819119	0.00335797	3.62488e+06	774420	0.00317472	31583.1	5179.48	2.94463e-05	77557.2	12719	7.23101e-05	54569.6	8949.18	5.08777e-05	0.507796	2.01311e+06	-297138	-393442	0	-690580	0	0.98	-676769	0.098604	390907	-57698.4
2028	Upgrading Hobs	0		0.830735	0		0.967132	0		0.914356	0.00272	0.980217	0.0197833	0.0027	0.955397	0.0446026	0.00271	0.967807	0.0321926	3.29337e+06	703596	0.00288438	3.83411e+06	819119	0.00335797	3.62488e+06	774420	0.00317472	36518	5405.49	3.29986e-05	82331.7	12187	7.4397e-05	59424.1	8796.12	5.36971e-05	0.507796	2.01311e+06	-297138	-393442	0	-690580	0	0.98	-676769	0.098604	390907	-57698.4
2028	Lagging of Hot Water Pipes	0.03		0.830735	0.04		0.967132	0.035		0.914356	0	0.980217	0.0197833	0	0.955397	0.0446026	0	0.967807	0.0321926	3.29337e+06	703596	0.00288438	3.83411e+06	819119	0.00335797	3.62488e+06	774420	0.00317472	36518	5405.49	3.29986e-05	82331.7	12187	7.4397e-05	59424.1	8796.12	5.36971e-05	0.507796	2.01311e+06	-297138	-393442	0	-690580	0.03	0.9506	-656466	0.098604	390907	-57698.4
2028	Lagging of Heating pipes	0.03		0.830735	0.04		0.967132	0.035		0.914356	0	0.980217	0.0197833	0	0.955397	0.0446026	0	0.967807	0.0321926	3.29337e+06	703596	0.00288438	3.83411e+06	819119	0.00335797	3.62488e+06	774420	0.00317472	36518	5405.49	3.29986e-05	82331.7	12187	7.4397e-05	59424.1	8796.12	5.36971e-05	0.507796	2.01311e+06	-297138	-393442	0	-690580	0.03	0.922082	-636772	0.098604	390907	-57698.4
2028	Cavity Wall Insulation	0.073		0.830735	0.155		0.967132	0.114		0.914356	0	0.980217	0.0197833	0	0.955397	0.0446026	0	0.967807	0.0321926	3.29337e+06	703596	0.00288438	3.83411e+06	819119	0.00335797	3.62488e+06	774420	0.00317472	36518	5405.49	3.29986e-05	82331.7	12187	7.4397e-05	59424.1	8796.12	5.36971e-05	0.507796	2.01311e+06	-297138	-393442	0	-690580	0.073	0.85477	-590287	0.098604	390907	-57698.4
2028	SunAmp Cubes (Parks Road £340,000 Merifield £50,000 DWB £100,000) to replace Calorifiers	0		0.830735	0		0.967132	0		0.914356	0	0.980217	0.0197833	0	0.955397	0.0446026	0	0.967807	0.0321926	3.29337e+06	703596	0.00288438	3.83411e+06	819119	0.00335797	3.62488e+06	774420	0.00317472	36518	5405.49	3.29986e-05	82331.7	12187	7.4397e-05	59424.1	8796.12	5.36971e-05	0.507796	2.01311e+06	-297138	-393442	0	-690580	0	0.85477	-590287	0.098604	390907	-57698.4
2029	Hydrogen Ready/Electric Boilers	0.25		1	0.25		1	0.25		1	0	0.980217	0.0197833	0	0.955397	0.0446026	0	0.967807	0.0321926	3.96441e+06	846957	0.00347209	3.96441e+06	846957	0.00347209	3.96441e+06	846957	0.00347209	36518	4822.19	3.19498e-05	82331.7	10871.9	7.20324e-05	59424.1	7846.94	5.19905e-05	0.677061	2.68415e+06	-297138	-393442	-508362	-1.19894e+06	0	0.85477	-1.02482e+06	0.131472	521209	-57698.4
2029	Replace Pumps	0		1	0		1	0		1	0.003	0.977276	0.022724	0.05	0.907628	0.0923724	0.0265	0.942161	0.0578395	3.96441e+06	846957	0.00347209	3.96441e+06	846957	0.00347209	3.96441e+06	846957	0.00347209	41946.1	5538.97	3.66989e-05	170510	22515.8	0.00014918	106766	14098.4	9.34098e-05	0.677061	2.68415e+06	-297138	-393442	-508362	-1.19894e+06	0	0.85477	-1.02482e+06	0.131472	521209	-57698.4
2029	Upgrading Fridges	0		1	0		1	0		1	0.0286	0.949326	0.0506741	0.0286	0.881669	0.118331	0.0286	0.915215	0.0847852	3.96441e+06	846957	0.00347209	3.96441e+06	846957	0.00347209	3.96441e+06	846957	0.00347209	93539.1	12351.8	8.18378e-05	218426	28843.1	0.000191102	156505	20666.4	0.000136927	0.677061	2.68415e+06	-297138	-393442	-508362	-1.19894e+06	0	0.85477	-1.02482e+06	0.131472	521209	-57698.4
2029	Lighting Occupancy (SALTO)	0		1	0		1	0		1	0.0025	0.946953	0.0530474	0.045	0.841994	0.158006	0.02375	0.893478	0.106522	3.96441e+06	846957	0.00347209	3.96441e+06	846957	0.00347209	3.96441e+06	846957	0.00347209	97920	12930.3	8.56707e-05	291662	38513.9	0.000255177	196628	25964.7	0.000172031	0.677061	2.68415e+06	-297138	-393442	-508362	-1.19894e+06	0	0.85477	-1.02482e+06	0.131472	521209	-57698.4
2029	Windows replace glazing with Vacuum (Grade 2 Listed) & Secondary and Triple where appropriate.	0.056		1	0.153		1	0.1045		1	0	0.946953	0.0530474	0	0.841994	0.158006	0	0.893478	0.106522	3.96441e+06	846957	0.00347209	3.96441e+06	846957	0.00347209	3.96441e+06	846957	0.00347209	97920	12930.3	8.56707e-05	291662	38513.9	0.000255177	196628	25964.7	0.000172031	0.677061	2.68415e+06	-297138	-393442	-508362	-1.19894e+06	0.056	0.806903	-967430	0.131472	521209	-57698.4
2030	Window apertures/architraves (sealing/draught proofing)	0		1	0		1	0		1	0	0.946953	0.0530474	0	0.841994	0.158006	0	0.893478	0.106522	3.96441e+06	846957	0.00347209	3.96441e+06	846957	0.00347209	3.96441e+06	846957	0.00347209	97920	11366.2	8.28584e-05	291662	33855.2	0.0002468	196628	22823.9	0.000166383	0.677061	2.68415e+06	-297138	-393442	-508362	-1.19894e+06	0	0.806903	-967430	0.131472	521209	-57698.4
2030	Designing and constructing/fitting Heritage Shutters HMR & Front Quad	0		1	0		1	0		1	0	0.946953	0.0530474	0	0.841994	0.158006	0	0.893478	0.106522	3.96441e+06	846957	0.00347209	3.96441e+06	846957	0.00347209	3.96441e+06	846957	0.00347209	97920	11366.2	8.28584e-05	291662	33855.2	0.0002468	196628	22823.9	0.000166383	0.677061	2.68415e+06	-297138	-393442	-508362	-1.19894e+06	0	0.806903	-967430	0.131472	521209	-57698.4
2030	External Doors (Glass)	0		1	0		1	0		1	0	0.946953	0.0530474	0	0.841994	0.158006	0	0.893478	0.106522	3.96441e+06	846957	0.00347209	3.96441e+06	846957	0.00347209	3.96441e+06	846957	0.00347209	97920	11366.2	8.28584e-05	291662	33855.2	0.0002468	196628	22823.9	0.000166383	0.677061	2.68415e+06	-297138	-393442	-508362	-1.19894e+06	0	0.806903	-967430	0.131472	521209	-57698.4
2031	PV (Solar Panels) small arrays some to generate electricity most to generate hot water	0		1	0		1	0		1	0.041	0.908128	0.0918724	0.08	0.774635	0.225365	0.0605	0.839423	0.160577	3.96441e+06	846957	0.00347209	3.96441e+06	846957	0.00347209	3.96441e+06	846957	0.00347209	169587	16976.3	0.000138631	416001	41643.3	0.000340066	296409	29671.7	0.000242304	0.677061	2.68415e+06	-297138	-393442	-508362	-1.19894e+06	0	0.806903	-967430	0.131472	521209	-57698.4
2031	Upgrade of Love Lane Transformer by SSE should it be required	0		1	0		1	0		1	0.0052	0.903405	0.0965947	0.0052	0.770607	0.229393	0.0052	0.835058	0.164942	3.96441e+06	846957	0.00347209	3.96441e+06	846957	0.00347209	3.96441e+06	846957	0.00347209	178304	17848.9	0.000145757	423436	42387.6	0.000346144	304466	30478.2	0.00024889	0.677061	2.68415e+06	-297138	-393442	-508362	-1.19894e+06	0	0.806903	-967430	0.131472	521209	-57698.4
2031	Upgrading Ovens	0		1	0		1	0		1	0.00272	0.900948	0.099052	0.0027	0.768526	0.231474	0.00271	0.832795	0.167205	3.96441e+06	846957	0.00347209	3.96441e+06	846957	0.00347209	3.96441e+06	846957	0.00347209	182840	18303	0.000149465	427277	42772.1	0.000349284	308643	30896.4	0.000252305	0.677061	2.68415e+06	-297138	-393442	-508362	-1.19894e+06	0	0.806903	-967430	0.131472	521209	-57698.4
2031	Upgrade HVAC units	0		1	0		1	0		1	0	0.900948	0.099052	0	0.768526	0.231474	0	0.832795	0.167205	3.96441e+06	846957	0.00347209	3.96441e+06	846957	0.00347209	3.96441e+06	846957	0.00347209	182840	18303	0.000149465	427277	42772.1	0.000349284	308643	30896.4	0.000252305	0.677061	2.68415e+06	-297138	-393442	-508362	-1.19894e+06	0	0.806903	-967430	0.131472	521209	-57698.4
2031	TREND BMS upgrade	0		1	0		1	0		1	0	0.900948	0.099052	0	0.768526	0.231474	0	0.832795	0.167205	3.96441e+06	846957	0.00347209	3.96441e+06	846957	0.00347209	3.96441e+06	846957	0.00347209	182840	18303	0.000149465	427277	42772.1	0.000349284	308643	30896.4	0.000252305	0.677061	2.68415e+06	-297138	-393442	-508362	-1.19894e+06	0	0.806903	-967430	0.131472	521209	-57698.4
2032	Upgrading of services pipework (Electric, Water, Gas pipe and meter removal and changes to Sewerage system			1	0		1	0		1	0	0.900948	0.099052	0	0.768526	0.231474	0	0.832795	0.167205	3.96441e+06	846957	0.00347209	3.96441e+06	846957	0.00347209	3.96441e+06	846957	0.00347209	182840	15382.5	0.000144214	427277	35947.2	0.000337012	308643	25966.5	0.000243441	0.677061	2.68415e+06	-297138	-393442	-508362	-1.19894e+06	0	0.806903	-967430	0.131472	521209	-57698.4
2033	Extrapolated	0		1	0		1	0		1	0	0.900948	0.099052	0	0.768526	0.231474	0	0.832795	0.167205	3.96441e+06	846957	0.00347209	3.96441e+06	846957	0.00347209	3.96441e+06	846957	0.00347209	182840	12462	0.000138963	427277	29122.4	0.000324741	308643	21036.5	0.000234576	0.677061	2.68415e+06	-297138	-393442	-508362	-1.19894e+06	0	0.806903	-967430	0.131472	521209	-57698.4
2034	Extrapolated	0		1	0		1	0		1	0	0.900948	0.099052	0	0.768526	0.231474	0	0.832795	0.167205	3.96441e+06	846957	0.00347209	3.96441e+06	846957	0.00347209	3.96441e+06	846957	0.00347209	182840	9541.53	0.000133711	427277	22297.5	0.000312469	308643	16106.6	0.000225712	0.677061	2.68415e+06	-297138	-393442	-508362	-1.19894e+06	0	0.806903	-967430	0.131472	521209	-57698.4
2035	Extrapolated	0		1	0		1	0		1	0	0.900948	0.099052	0	0.768526	0.231474	0	0.832795	0.167205	3.96441e+06	846957	0.00347209	3.96441e+06	846957	0.00347209	3.96441e+06	846957	0.00347209	182840	6621.05	0.00012846	427277	15472.7	0.000300198	308643	11176.7	0.000216848	0.677061	2.68415e+06	-297138	-393442	-508362	-1.19894e+06	0	0.806903	-967430	0.131472	521209	-57698.4
Table 2: Additional electricity requirements for sustainable energy generation methods
		Percentage fuel savings (%)			Efficiency of sustainable energy generation solutions
	Name	lower bound	upper bound	median
	Electric boiler	0.25	0.25	0.25	-0.757576
	GSHP	0.45	0.45	0.45	-0.325733
	ASHP	0.3	0.3	0.3	-0.369004
Table 3: Carbon/biodiversity intensities per KwH per year
	Year	Total KwH	Carbon	biodiversity	change in total BAU Carbon	change in total BAU biodiv
electricity	2022	1845897	0.24386	1.07595e-09	0	0
	2023	1845897	0.227887	1.04723e-09	29484.3	5.30144e-05
	2024	1845897	0.211914	1.01851e-09	58968.7	0.000106029
	2025	1845897	0.195941	9.89785e-10	88453	0.000159043
	2026	1845897	0.179968	9.61065e-10	117937	0.000212058
	2027	1845897	0.163995	9.32345e-10	147422	0.000265072
	2028	1845897	0.148023	9.03625e-10	176906	0.000318086
	2029	1845897	0.13205	8.74905e-10	206390	0.000371101
	2030	1845897	0.116077	8.46184e-10	235875	0.000424115
	2031	1845897	0.100104	8.17464e-10	265359	0.00047713
	2032	1845897	0.084131	7.88744e-10	294843	0.000530144
	2033	1845897	0.0681581	7.60024e-10	324328	0.000583158
	2034	1845897	0.0521852	7.31304e-10	353812	0.000636173
	2035	1845897	0.0362123	7.02584e-10	383296	0.000689187
	Fuel	3.96441e+06	0.21364	8.75814e-10
[truncated: 40 more columns]
